# Supplementary material for: High-resolution stable isotope signature of a land-fallingAtmospheric River in southern Norway
Source: Copernicus journal article supplement (doi:10.5194/wcd-2020-58), 2020-12-09
Supplement: Supplementary file 1 [file data_AR20161207_isotope_Weng2020.xlsx]

## Sheet: AWS2700
time	air_temperature_C	pressure	RH_%	wind_gust_m/s	wind_direction_degree	wind_speed_m/s
736671	5.4	1016.2	75	12.2	162	7.5
736671	5.6	1016.2	75	12.2	161	6.7
736671	5.4	1015.9	76	10.2	162	7.2
736671	5.4	1015.7	76	10.4	164	7.2
736671	5.4	1015.9	76	10.7	166	7.7
736671	5.4	1015.5	76	11	164	7.2
736671	5.1	1015.4	78	10.4	164	7.1
736671	5.1	1015.2	79	9.2	160	6.2
736671	5.1	1015.2	79	9.6	165	6.6
736671	5.1	1014.7	79	10.7	164	7.5
736671	5.2	1014.5	79	11.3	166	7.8
736671	5.1	1014.2	80	8.7	164	6.3
736671	5.2	1014	79	10.7	162	7.1
736671	5.2	1013.7	79	11.9	168	7.7
736671	5.3	1013.5	79	11	163	6.9
736671	5.4	1013.5	78	11.9	161	7.4
736671	5.2	1013.2	78	10.7	159	7.1
736671	5.1	1013	80	11	163	6.9
736671	5.1	1012.8	80	11.9	161	7.3
736671	5.1	1012.7	81	10.2	157	6.6
736671	5.1	1012.3	80	10.7	159	7
736671	5.1	1012.2	80	10.2	160	7.2
736671	5.2	1011.6	80	11	160	7.5
736671	5.2	1011.5	79	10.2	161	7.3
736671	5.3	1011.1	78	12.5	163	7.7
736671	5.4	1011	77	11	163	8.3
736671	5.4	1010.6	77	12.8	165	8.4
736671	5.5	1010.3	77	13.1	169	8.2
736671	5.2	1010.3	78	11	164	7.8
736671	5.2	1009.8	79	11.9	164	8.3
736671	5.2	1009.6	78	13.1	170	9.1
736671	5.3	1009.3	79	14	170	9.7
736671	5.4	1009	79	14	170	10.7
736671	5.2	1008.8	81	14.6	167	9.9
736671	5.2	1008.6	83	13.1	164	8.6
736671	5	1008.3	83	11.9	166	8.8
736671	5	1007.8	84	12.5	166	8.3
736671	5.1	1007.6	85	12.8	164	8.7
736671	5.1	1007.4	85	12.8	163	8.1
736671	5.2	1007.3	85	10.7	167	7.8
736671	5.4	1007.3	86	11.9	167	7.2
736671	5.4	1007.1	87	8.9	169	6.2
736671	5.5	1006.6	88	9.2	167	5.8
736671	5.6	1006.6	88	9.2	168	6
736671	5.7	1006.3	88	8.7	164	5.7
736671	5.9	1006.1	89	8.7	162	5.8
736671	6	1005.9	89	9.2	156	6.2
736671	5.9	1006.1	89	10.2	164	6.5
736671	6	1005.9	90	10.2	164	6.4
736671	6.1	1006.1	90	11	165	7.1
736671	6.1	1005.9	91	9.2	162	5.7
736671	6.2	1005.9	91	8.7	162	6.3
736671	6.3	1005.8	91	8.1	156	5.5
736671	6.3	1005.6	92	9.6	161	5.9
736671	6.4	1005.2	91	8.4	162	5.9
736671	6.5	1005.2	92	8.7	160	5.5
736671	6.6	1005.2	92	8.7	163	5.7
736671	6.7	1004.9	92	8.7	160	5.5
736671	6.8	1004.7	91	8.7	163	6.1
736671	6.9	1004.7	92	10.2	166	6.9
736671	6.9	1004.9	91	9.8	167	6.6
736671	7	1004.7	91	10.2	168	7.2
736671	7	1004.6	92	9.6	164	6.5
736671	7	1004.6	92	9.2	161	5.9
736671	7	1004.4	92	8.7	165	5.7
736671	7.1	1004.2	92	8.9	166	6
736671	7.2	1004.1	92	10.4	166	7
736671	7.2	1003.9	93	9.6	167	6.7
736671	7.3	1003.7	92	10.4	170	7.7
736671	7.3	1003.4	92	11.3	169	7.9
736671	7.4	1003.2	92	9.8	168	7.2
736671	7.5	1003.1	92	11.6	170	8.7
736671	7.5	1002.9	92	11	170	8.5
736671	7.6	1002.7	91	12.2	172	9.1
736671	7.7	1002.4	91	12.2	173	9.6
736671	7.6	1002.4	91	12.2	173	9.2
736671	7.7	1002.4	91	11.6	174	8.9
736671	7.8	1002.2	91	11.9	177	8.7
736672	7.8	1002	91	11	176	8.5
736672	7.9	1001.9	90	10.2	176	8
736672	7.9	1001.9	91	9.2	174	6.9
736672	8	1001.7	91	8.9	172	6.9
736672	8	1001.7	91	10.2	171	7.8
736672	8	1001.7	91	9.6	170	7.2
736672	8	1001.5	92	9.6	166	6.9
736672	8	1001.2	92	9.6	167	6.8
736672	8	1001.4	92	8.9	167	6.9
736672	8.1	1001	92	9.2	168	7
736672	8.1	1001	92	10.2	169	6.8
736672	8.3	1001.2	91	11.3	169	8.4
736672	8.2	1000.9	91	10.7	169	7.4
736672	8.3	1001.2	92	9.2	173	6.9
736672	8.4	1001	91	10.7	171	8.1
736672	8.4	1001.2	91	10.2	170	8
736672	8.4	1001.2	92	9.8	170	7.2
736672	8.4	1001	92	9.8	167	7.2
736672	8.3	1001	92	9.6	167	7.2
736672	8.4	1000.9	93	7.8	165	5.8
736672	8.4	1000.7	93	8.7	166	6.4
736672	8.4	1000.5	93	8.7	167	6.6
736672	8.4	1000.2	93	8.4	165	6
736672	8.6	1000.2	93	9.8	171	7.5
736672	8.7	1000	93	9.8	172	7.8
736672	8.6	1000	93	9.8	164	6.4
736672	8.7	1000.2	93	8.9	170	7
736672	8.7	1000.2	93	8.7	166	6.3
736672	8.6	999.9	93	8.4	165	6.7
736672	8.6	999.7	94	8.7	167	6.4
736672	8.7	999.5	94	8.7	165	6.4
736672	8.7	999.4	94	8.4	164	5.8
736672	8.8	999.4	94	8.4	170	6.6
736672	8.9	999.5	94	8.9	165	6.6
736672	8.8	999.4	94	8.7	165	6.3
736672	8.9	999.2	94	8.1	168	6.1
736672	8.9	999.4	94	8.1	164	5.8
736672	8.9	999.2	94	9.2	169	6.7
736672	8.8	999.4	94	8.9	170	6.9
736672	8.8	999.2	94	8.7	169	6.1
736672	8.8	999.4	94	8.7	164	6
736672	8.8	999.4	94	7.5	156	4.9
736672	8.9	999.2	94	7.5	157	5.3
736672	8.9	999.2	94	6.6	160	4.8
736672	8.9	999.2	95	6.6	154	4.5
736672	9.2	999.2	95	6	154	4.1
736672	9.3	999.2	94	6.9	150	4.4
736672	9.3	998.7	95	6	146	3.5
736672	9.3	998.7	94	6	150	4
736672	9.4	998.8	94	6	165	4.5
736672	9.5	998.7	94	7.8	164	4.8
736672	9.5	998.3	95	6.3	161	4.4
736672	9.6	998.2	95	8.9	162	5.5
736672	9.6	998.2	95	8.7	161	5.6
736672	9.5	998	95	8.1	153	5.5
736672	9.5	998	95	6.9	157	4.9
736672	9.6	997.8	95	7.5	153	4.4
736672	9.6	997.8	95	7.2	157	4.6
736672	9.7	997.7	95	6.3	158	3.4
736672	9.8	997.7	95	9.2	156	4.9
736672	9.8	997.5	95	8.1	163	6
736672	9.8	997.3	95	8.1	156	5.2
736672	9.9	997.3	95	6.9	149	4.6
736672	10	997.2	95	7.8	147	4.6
736672	9.9	997	95	7.8	153	4.2
736672	10	997	95	9.8	146	5.6
736672	10.2	997.2	95	8.1	150	5.2
736672	10.2	996.8	95	8.7	143	5.4
736672	10.3	996.8	95	11.3	141	6.2
736672	10.3	997	95	8.9	144	5
736672	10.4	996.8	94	8.7	142	5.4
736672	10.4	997	95	8.1	144	5
736672	10.9	997	94	9.2	143	5.2
736672	11.1	996.8	94	7.2	140	4.1
736672	11	997.2	93	7.2	154	4
736672	10.8	997	93	7.2	140	4.5
736672	10.8	997	92	7.2	140	4.2
736672	10.9	997.3	91	6.9	148	3.7
736672	11	997.2	90	5.7	141	2.5

## Sheet: TPS3100
time_10min	rain_rate_10min_mm/h
736671	0.72
736671	0.427
736671	0.532
736671	0.495
736671	0.322
736671	0.313
736671	0.401
736671	0.357
736671	0.309
736671	0.411
736671	0.835
736671	0.627778
736671	0.622
736671	0.444
736671	0.474
736671	0.583
736671	0.502
736671	0.52
736671	0.493
736671	0.544
736671	0.612
736671	0.675
736671	0.761
736671	0.91
736671	1.04778
736671	1.056
736671	0.99
736671	1.259
736671	1.288
736671	1.276
736671	1.577
736671	1.661
736671	1.729
736671	1.608
736671	1.801
736671	2.333
736671	2.00556
736671	2.045
736671	2.262
736671	2.716
736671	2.649
736671	3.344
736671	3.657
736671	5.358
736671	4.598
736671	2.83
736671	2.408
736671	3.542
736671	3.84667
736671	3.845
736671	4.284
736671	2.798
736671	3.718
736671	4.132
736671	3.715
736671	5.154
736671	5.081
736671	5.466
736671	4.62
736671	2.77
736671	1.81111
736671	2.49
736671	2.956
736671	3.01
736671	2.557
736671	2.978
736671	2.962
736671	2.096
736671	1.925
736671	1.782
736671	2.664
736671	2.08
736671	1.73444
736672	0.726
736672	1.287
736672	1.926
736672	2.095
736672	2.94
736672	3.207
736672	3.124
736672	2.742
736672	3.212
736672	3.532
736672	3.955
736672	3.68778
736672	3.275
736672	3.222
736672	3.679
736672	1.803
736672	2.413
736672	3.113
736672	1.645
736672	2.027
736672	4.261
736672	3.057
736672	2.583
736672	1.93222
736672	4.184
736672	2.599
736672	3.127
736672	3.468
736672	2.402
736672	2.019
736672	3.45
736672	2.804
736672	2.158
736672	2.256
736672	2.419
736672	3.79444
736672	2.329
736672	3.317
736672	3.68
736672	4.47
736672	1.886
736672	7.572
736672	3.131
736672	5.215
736672	5.94
736672	1.263
736672	3.446
736672	4.52778
736672	5.048
736672	2.704
736672	2.089
736672	3.021
736672	3.43
736672	4.644
736672	2.589
736672	3.22
736672	8.166
736672	3.136
736672	1.361
736672	0.33
736672	0.289
736672	2.81
736672	1.314
736672	1.895
736672	7.588
736672	2.674
736672	0.103
736672	0.232
736672	0
736672	0
736672	0
736672	0

## Sheet: Parsivel2_time
736671
736671
736671
736671
736671
736671
736671
736671
736671
736671
736671
736671
736671
736671
736671
736671
736671
736671
736671
736671
736671
736671
736671
736671
736671
736671
736671
736671
736671
736671
736671
736671
736671
736671
736671
736671
736671
736671
736671
736671
736671
736671
736671
736671
736671
736671
736671
736671
736671
736671
736671
736671
736671
736671
736671
736671
736671
736671
736671
736671
736671
736671
736671
736671
736671
736671
736671
736671
736671
736671
736671
736671
736671
736671
736671
736671
736671
736671
736671
736671
736671
736671
736671
736671
736671
736671
736671
736671
736671
736671
736671
736671
736671
736671
736671
736671
736671
736671
736671
736671
736671
736671
736671
736671
736671
736671
736671
736671
736671
736671
736671
736671
736671
736671
736671
736671
736671
736671
736671
736671
736671
736671
736671
736671
736671
736671
736671
736671
736671
736671
736671
736671
736671
736671
736671
736671
736671
736671
736671
736671
736671
736671
736671
736671
736671
736671
736671
736671
736671
736671
736671
736671
736671
736671
736671
736671
736671
736671
736671
736671
736671
736671
736671
736671
736671
736671
736671
736671
736671
736671
736671
736671
736671
736671
736671
736671
736671
736671
736671
736671
736671
736671
736671
736671
736671
736671
736671
736671
736671
736671
736671
736671
736671
736671
736671
736671
736671
736671
736671
736671
736671
736671
736671
736671
736671
736671
736671
736671
736671
736671
736671
736671
736671
736671
736671
736671
736671
736671
736671
736671
736671
736671
736671
736671
736671
736671
736671
736671
736671
736671
736671
736671
736671
736671
736671
736671
736671
736671
736671
736671
736671
736671
736671
736671
736671
736671
736671
736671
736671
736671
736671
736671
736671
736671
736671
736671
736671
736671
736671
736671
736671
736671
736671
736671
736671
736671
736671
736671
736671
736671
736671
736671
736671
736671
736671
736671
736671
736671
736671
736671
736671
736671
736671
736671
736671
736671
736671
736671
736671
736671
736671
736671
736671
736671
736671
736671
736671
736671
736671
736671
736671
736671
736671
736671
736671
736671
736671
736671
736671
736671
736671
736671
736671
736671
736671
736671
736671
736671
736671
736671
736671
736671
736671
736671
736671
736671
736671
736671
736671
736671
736671
736671
736671
736671
736671
736671
736671
736671
736671
736671
736671
736671
736671
736671
736671
736671
736671
736671
736671
736671
736671
736671
736671
736671
736671
736671
736671
736671
736671
736671
736671
736671
736671
736671
736671
736671
736671
736671
736671
736671
736671
736671
736671
736671
736671
736671
736671
736671
736671
736671
736671
736671
736671
736671
736671
736671
736671
736671
736671
736671
736671
736671
736671
736671
736671
736671
736671
736671
736671
736671
736671
736671
736671
736671
736671
736671
736671
736671
736671
736671
736671
736671
736671
736671
736671
736671
736671
736671
736671
736671
736671
736671
736671
736671
736671
736671
736671
736671
736671
736671
736671
736671
736671
736671
736671
736671
736671
736671
736671
736671
736671
736671
736671
736671
736671
736671
736671
736671
736671
736671
736671
736671
736671
736671
736671
736671
736671
736671
736671
736671
736671
736671
736671
736671
736671
736671
736671
736671
736671
736671
736671
736671
736671
736671
736671
736671
736671
736671
736671
736671
736671
736671
736671
736671
736671
736671
736671
736671
736671
736671
736671
736671
736671
736671
736671
736671
736671
736671
736671
736671
736671
736671
736671
736671
736671
736671
736671
736671
736671
736671
736671
736671
736671
736671
736671
736671
736671
736671
736671
736671
736671
736671
736671
736671
736671
736671
736671
736671
736671
736671
736671
736671
736671
736671
736671
736671
736671
736671
736671
736671
736671
736671
736671
736671
736671
736671
736671
736671
736671
736671
736671
736671
736671
736671
736671
736671
736671
736671
736671
736671
736671
736671
736671
736671
736671
736671
736671
736671
736671
736671
736671
736671
736671
736671
736671
736671
736671
736671
736671
736671
736671
736671
736671
736671
736671
736671
736671
736671
736671
736671
736671
736671
736671
736671
736671
736671
736671
736671
736671
736671
736671
736671
736671
736671
736671
736671
736671
736671
736671
736671
736671
736671
736671
736671
736671
736671
736671
736671
736671
736671
736671
736671
736671
736671
736671
736671
736671
736671
736671
736671
736671
736671
736671
736671
736671
736671
736671
736671
736671
736671
736671
736671
736671
736671
736671
736671
736671
736671
736671
736671
736671
736671
736671
736671
736671
736671
736671
736671
736671
736671
736671
736671
736671
736671
736671
736671
736671
736671
736671
736671
736671
736671
736671
736671
736671
736671
736671
736671
736671
736671
736671
736671
736671
736671
736671
736671
736671
736671
736671
736671
736671
736671
736671
736671
736671
736671
736671
736671
736671
736671
736671
736671
736671
736671
736671
736671
736671
736671
736671
736671
736671
736671
736671
736671
736671
736671
736671
736671
736671
736671
736671
736671
736671
736671
736671
736671
736671
736671
736671
736671
736671
736671
736671
736671
736671
736671
736671
736671
736671
736671
736671
736671
736671
736671
736671
736671
736671
736671
736671
736671
736671
736671
736671
736671
736671
736671
736671
736671
736671
736671
736671
736671
736671
736671
736671
736671
736671
736671
736671
736671
736671
736671
736671
736671
736671
736671
736671
736671
736671
736671
736672
736672
736672
736672
736672
736672
736672
736672
736672
736672
736672
736672
736672
736672
736672
736672
736672
736672
736672
736672
736672
736672
736672
736672
736672
736672
736672
736672
736672
736672
736672
736672
736672
736672
736672
736672
736672
736672
736672
736672
736672
736672
736672
736672
736672
736672
736672
736672
736672
736672
736672
736672
736672
736672
736672
736672
736672
736672
736672
736672
736672
736672
736672
736672
736672
736672
736672
736672
736672
736672
736672
736672
736672
736672
736672
736672
736672
736672
736672
736672
736672
736672
736672
736672
736672
736672
736672
736672
736672
736672
736672
736672
736672
736672
736672
736672
736672
736672
736672
736672
736672
736672
736672
736672
736672
736672
736672
736672
736672
736672
736672
736672
736672
736672
736672
736672
736672
736672
736672
736672
736672
736672
736672
736672
736672
736672
736672
736672
736672
736672
736672
736672
736672
736672
736672
736672
736672
736672
736672
736672
736672
736672
736672
736672
736672
736672
736672
736672
736672
736672
736672
736672
736672
736672
736672
736672
736672
736672
736672
736672
736672
736672
736672
736672
736672
736672
736672
736672
736672
736672
736672
736672
736672
736672
736672
736672
736672
736672
736672
736672
736672
736672
736672
736672
736672
736672
736672
736672
736672
736672
736672
736672
736672
736672
736672
736672
736672
736672
736672
736672
736672
736672
736672
736672
736672
736672
736672
736672
736672
736672
736672
736672
736672
736672
736672
736672
736672
736672
736672
736672
736672
736672
736672
736672
736672
736672
736672
736672
736672
736672
736672
736672
736672
736672
736672
736672
736672
736672
736672
736672
736672
736672
736672
736672
736672
736672
736672
736672
736672
736672
736672
736672
736672
736672
736672
736672
736672
736672
736672
736672
736672
736672
736672
736672
736672
736672
736672
736672
736672
736672
736672
736672
736672
736672
736672
736672
736672
736672
736672
736672
736672
736672
736672
736672
736672
736672
736672
736672
736672
736672
736672
736672
736672
736672
736672
736672
736672
736672
736672
736672
736672
736672
736672
736672
736672
736672
736672
736672
736672
736672
736672
736672
736672
736672
736672
736672
736672
736672
736672
736672
736672
736672
736672
736672
736672
736672
736672
736672
736672
736672
736672
736672
736672
736672
736672
736672
736672
736672
736672
736672
736672
736672
736672
736672
736672
736672
736672
736672
736672
736672
736672
736672
736672
736672
736672
736672
736672
736672
736672
736672
736672
736672
736672
736672
736672
736672
736672
736672
736672
736672
736672
736672
736672
736672
736672
736672
736672
736672
736672
736672
736672
736672
736672
736672
736672
736672
736672
736672
736672
736672
736672
736672
736672
736672
736672
736672
736672
736672
736672
736672
736672
736672
736672
736672
736672
736672
736672
736672
736672
736672
736672
736672
736672
736672
736672
736672
736672
736672
736672
736672
736672
736672
736672
736672
736672
736672
736672
736672
736672
736672
736672
736672
736672
736672
736672
736672
736672
736672
736672
736672
736672
736672
736672
736672
736672
736672
736672
736672
736672
736672
736672
736672
736672
736672
736672
736672
736672
736672
736672
736672
736672
736672
736672
736672
736672
736672
736672
736672
736672
736672
736672
736672
736672
736672
736672
736672
736672
736672
736672
736672
736672
736672
736672
736672
736672
736672
736672
736672
736672
736672
736672
736672
736672
736672
736672
736672
736672
736672
736672
736672
736672
736672
736672
736672
736672
736672
736672
736672
736672
736672
736672
736672
736672
736672
736672
736672
736672
736672
736672
736672
736672
736672
736672
736672
736672
736672
736672
736672
736672
736672
736672
736672
736672
736672
736672
736672
736672
736672
736672
736672
736672
736672
736672
736672
736672
736672
736672
736672
736672
736672
736672
736672
736672
736672
736672
736672
736672
736672
736672
736672
736672
736672
736672
736672
736672
736672
736672
736672
736672
736672
736672
736672
736672
736672
736672
736672
736672
736672
736672
736672
736672
736672
736672
736672
736672
736672
736672
736672
736672
736672
736672
736672
736672
736672
736672
736672
736672
736672
736672
736672
736672
736672
736672
736672
736672
736672
736672
736672
736672
736672
736672
736672
736672
736672
736672
736672
736672
736672
736672
736672
736672
736672
736672
736672
736672
736672
736672
736672
736672
736672
736672
736672
736672
736672
736672
736672
736672
736672
736672
736672
736672
736672
736672
736672
736672
736672
736672
736672
736672
736672
736672
736672
736672
736672
736672
736672
736672
736672
736672
736672
736672
736672
736672
736672
736672
736672
736672
736672
736672
736672
736672
736672
736672
736672
736672
736672
736672
736672
736672
736672
736672
736672
736672
736672
736672
736672
736672
736672
736672
736672
736672
736672
736672
736672
736672
736672
736672
736672
736672
736672
736672
736672
736672
736672
736672
736672
736672
736672
736672
736672
736672
736672
736672
736672
736672
736672
736672
736672
736672
736672
736672
736672
736672
736672
736672
736672
736672
736672
736672
736672
736672
736672
736672
736672
736672
736672
736672
736672
736672
736672
736672
736672
736672
736672
736672
736672
736672
736672
736672
736672
736672
736672
736672
736672
736672
736672
736672
736672
736672
736672
736672
736672
736672
736672
736672
736672
736672
736672
736672
736672
736672
736672
736672
736672
736672
736672
736672
736672
736672
736672

## Sheet: Parsivel2_size_mm
0.062
0.187
0.312
0.437
0.562
0.687
0.812
0.937
1.062
1.187
1.375
1.625
1.875
2.125
2.375
2.75
3.25
3.75
4.25
4.75
5.5
6.5
7.5
8.5
9.5
11
13
15
17
19
21.5
24.5

## Sheet: Parsivel2_number_distribution
NaN	NaN	NaN	NaN	NaN	NaN	NaN	NaN	NaN	NaN	NaN	NaN	NaN	NaN	NaN	NaN	NaN	NaN	NaN	NaN	NaN	NaN	NaN	NaN	NaN	NaN	NaN	NaN	NaN	NaN	NaN	NaN	NaN	NaN	NaN	NaN	NaN	NaN	NaN	NaN	NaN	NaN	NaN	NaN	NaN	NaN	NaN	NaN	NaN	NaN
NaN	NaN	NaN	NaN	NaN	NaN	NaN	NaN	NaN	NaN	NaN	NaN	NaN	NaN	NaN	NaN	NaN	NaN	NaN	NaN	NaN	NaN	NaN	NaN	NaN	NaN	NaN	NaN	NaN	NaN	NaN	NaN	NaN	NaN	NaN	NaN	NaN	NaN	NaN	NaN	NaN	NaN	NaN	NaN	NaN	NaN	NaN	NaN	NaN	NaN
0	0	0	0	0	0	0	0	0	0	0	0	0	0	0	0	0	154.989	0	0	138.959	144.291	173.681	150.134	183.723	0	0	0	0	14.6002	0	0	0	0	0	0	0	0	NaN	NaN	NaN	0	NaN	0	0	0	0	0	0	0
NaN	NaN	0	0	0	0	0	0	0	0	0	0	NaN	0	0	0	NaN	102.641	0	0	86.2589	125.795	157.729	107.429	142.845	0	0	0	0	165.635	0	0	0	0	0	0	0	NaN	NaN	NaN	NaN	0	NaN	0	0	0	0	NaN	0	0
NaN	NaN	NaN	NaN	NaN	0	NaN	NaN	0	NaN	NaN	NaN	NaN	0	0	NaN	0	100.537	0	0	53.7711	45.376	24.4478	81.2523	183.899	0	0	0	0	162.57	0	0	0	NaN	0	0	NaN	NaN	NaN	NaN	NaN	NaN	NaN	NaN	NaN	NaN	0	0	0	0
NaN	NaN	NaN	NaN	NaN	NaN	NaN	NaN	NaN	NaN	NaN	NaN	NaN	NaN	NaN	NaN	0	NaN	NaN	0	38.9918	NaN	74.2334	154.41	205.508	0	0	0	0	96.7859	0	0	0	0	0	0	0	NaN	NaN	NaN	NaN	NaN	NaN	NaN	NaN	NaN	NaN	NaN	0	0
NaN	NaN	NaN	NaN	NaN	NaN	NaN	NaN	NaN	NaN	NaN	NaN	NaN	NaN	NaN	NaN	NaN	NaN	NaN	NaN	NaN	29.4472	45.8216	14.7236	38.5078	0	0	0	0	373.626	0	0	NaN	NaN	0	0	0	0	NaN	NaN	NaN	NaN	NaN	NaN	NaN	NaN	NaN	NaN	NaN	0
NaN	NaN	NaN	NaN	NaN	NaN	NaN	NaN	NaN	NaN	NaN	NaN	NaN	NaN	NaN	NaN	NaN	NaN	NaN	NaN	NaN	33.4441	11.4014	NaN	NaN	NaN	0	0	0	NaN	0	0	NaN	NaN	NaN	0	NaN	NaN	NaN	NaN	NaN	NaN	NaN	NaN	NaN	NaN	NaN	NaN	NaN	NaN
NaN	NaN	NaN	NaN	NaN	NaN	NaN	NaN	NaN	NaN	NaN	NaN	NaN	NaN	NaN	0	0	NaN	NaN	0	NaN	16.7575	NaN	NaN	13.2296	NaN	NaN	NaN	NaN	NaN	NaN	NaN	NaN	NaN	NaN	NaN	NaN	NaN	NaN	NaN	NaN	NaN	NaN	NaN	NaN	NaN	NaN	NaN	NaN	NaN
NaN	NaN	NaN	NaN	NaN	NaN	NaN	NaN	NaN	NaN	NaN	NaN	NaN	NaN	0	NaN	NaN	NaN	NaN	NaN	26.5155	NaN	NaN	NaN	33.5863	0	NaN	NaN	NaN	NaN	NaN	NaN	NaN	NaN	NaN	NaN	NaN	NaN	NaN	NaN	NaN	NaN	NaN	NaN	NaN	NaN	NaN	NaN	NaN	NaN
NaN	NaN	NaN	NaN	NaN	NaN	NaN	NaN	NaN	NaN	NaN	NaN	NaN	NaN	NaN	NaN	NaN	NaN	NaN	0	5.74329	14.865	4.21175	NaN	11.5098	NaN	NaN	NaN	NaN	NaN	NaN	NaN	NaN	NaN	NaN	NaN	0	NaN	NaN	NaN	NaN	NaN	NaN	NaN	NaN	NaN	NaN	NaN	NaN	NaN
NaN	NaN	NaN	NaN	NaN	NaN	NaN	NaN	NaN	NaN	NaN	NaN	NaN	NaN	NaN	0	NaN	3.73216	NaN	NaN	15.4263	3.73216	3.73216	7.07146	NaN	NaN	NaN	NaN	NaN	NaN	NaN	NaN	NaN	NaN	NaN	NaN	NaN	NaN	NaN	NaN	NaN	NaN	NaN	NaN	NaN	NaN	NaN	NaN	NaN	NaN
NaN	NaN	NaN	NaN	NaN	NaN	NaN	NaN	NaN	NaN	NaN	NaN	NaN	NaN	NaN	NaN	NaN	3.35366	NaN	NaN	NaN	NaN	NaN	NaN	NaN	NaN	NaN	NaN	NaN	NaN	NaN	NaN	NaN	NaN	NaN	NaN	NaN	NaN	NaN	NaN	NaN	NaN	NaN	NaN	NaN	NaN	NaN	NaN	NaN	NaN
NaN	NaN	NaN	NaN	NaN	NaN	NaN	NaN	NaN	NaN	NaN	NaN	NaN	NaN	NaN	NaN	NaN	NaN	NaN	NaN	4.26633	NaN	NaN	NaN	NaN	NaN	NaN	NaN	NaN	NaN	NaN	NaN	NaN	NaN	NaN	NaN	NaN	NaN	NaN	NaN	NaN	NaN	NaN	NaN	NaN	NaN	NaN	NaN	NaN	NaN
NaN	NaN	NaN	NaN	NaN	NaN	NaN	NaN	NaN	NaN	NaN	NaN	NaN	NaN	NaN	NaN	NaN	NaN	NaN	NaN	NaN	NaN	NaN	NaN	NaN	NaN	NaN	NaN	NaN	NaN	NaN	NaN	NaN	NaN	NaN	NaN	NaN	NaN	NaN	NaN	NaN	NaN	NaN	NaN	NaN	NaN	NaN	NaN	NaN	NaN
NaN	NaN	NaN	NaN	NaN	NaN	NaN	NaN	NaN	NaN	NaN	NaN	NaN	NaN	NaN	NaN	NaN	NaN	NaN	NaN	NaN	NaN	NaN	NaN	NaN	NaN	NaN	NaN	NaN	NaN	NaN	NaN	NaN	NaN	NaN	NaN	NaN	NaN	NaN	NaN	NaN	NaN	NaN	NaN	NaN	NaN	NaN	NaN	NaN	NaN
NaN	NaN	NaN	NaN	NaN	NaN	NaN	NaN	NaN	NaN	NaN	NaN	NaN	NaN	NaN	NaN	NaN	NaN	NaN	NaN	NaN	NaN	NaN	NaN	NaN	NaN	NaN	NaN	NaN	NaN	NaN	NaN	NaN	NaN	NaN	NaN	NaN	NaN	NaN	NaN	NaN	NaN	NaN	NaN	NaN	NaN	NaN	NaN	NaN	NaN
NaN	NaN	NaN	NaN	NaN	NaN	NaN	NaN	NaN	NaN	NaN	NaN	NaN	NaN	NaN	NaN	NaN	NaN	NaN	NaN	NaN	NaN	NaN	NaN	NaN	NaN	NaN	NaN	NaN	NaN	NaN	NaN	NaN	NaN	NaN	NaN	NaN	NaN	NaN	NaN	NaN	NaN	NaN	NaN	NaN	NaN	NaN	NaN	NaN	NaN
NaN	NaN	NaN	NaN	NaN	NaN	NaN	NaN	NaN	NaN	NaN	NaN	NaN	NaN	NaN	NaN	NaN	NaN	NaN	NaN	NaN	NaN	NaN	NaN	NaN	NaN	NaN	NaN	NaN	NaN	NaN	NaN	NaN	NaN	NaN	NaN	NaN	NaN	NaN	NaN	NaN	NaN	NaN	NaN	NaN	NaN	NaN	NaN	NaN	NaN
NaN	NaN	NaN	NaN	NaN	NaN	NaN	NaN	NaN	NaN	NaN	NaN	NaN	NaN	NaN	NaN	NaN	NaN	NaN	NaN	NaN	NaN	NaN	NaN	NaN	NaN	NaN	NaN	NaN	NaN	NaN	NaN	NaN	NaN	NaN	NaN	NaN	NaN	NaN	NaN	NaN	NaN	NaN	NaN	NaN	NaN	NaN	NaN	NaN	NaN
NaN	NaN	NaN	NaN	NaN	NaN	NaN	NaN	NaN	NaN	NaN	NaN	NaN	NaN	NaN	NaN	NaN	NaN	NaN	NaN	NaN	NaN	NaN	NaN	NaN	NaN	NaN	NaN	NaN	NaN	NaN	NaN	NaN	NaN	NaN	NaN	NaN	NaN	NaN	NaN	NaN	NaN	NaN	NaN	NaN	NaN	NaN	NaN	NaN	NaN
NaN	NaN	NaN	NaN	NaN	NaN	NaN	NaN	NaN	NaN	NaN	NaN	NaN	NaN	NaN	NaN	NaN	NaN	NaN	NaN	NaN	NaN	NaN	NaN	NaN	NaN	NaN	NaN	NaN	NaN	NaN	NaN	NaN	NaN	NaN	NaN	NaN	NaN	NaN	NaN	NaN	NaN	NaN	NaN	NaN	NaN	NaN	NaN	NaN	NaN
NaN	NaN	NaN	NaN	NaN	NaN	NaN	NaN	NaN	NaN	NaN	NaN	NaN	NaN	NaN	NaN	NaN	NaN	NaN	NaN	NaN	NaN	NaN	NaN	NaN	NaN	NaN	NaN	NaN	NaN	NaN	NaN	NaN	NaN	NaN	NaN	NaN	NaN	NaN	NaN	NaN	NaN	NaN	NaN	NaN	NaN	NaN	NaN	NaN	NaN
NaN	NaN	NaN	NaN	NaN	NaN	NaN	NaN	NaN	NaN	NaN	NaN	NaN	NaN	NaN	NaN	NaN	NaN	NaN	NaN	NaN	NaN	NaN	NaN	NaN	NaN	NaN	NaN	NaN	NaN	NaN	NaN	NaN	NaN	NaN	NaN	NaN	NaN	NaN	NaN	NaN	NaN	NaN	NaN	NaN	NaN	NaN	NaN	NaN	NaN
NaN	NaN	NaN	NaN	NaN	NaN	NaN	NaN	NaN	NaN	NaN	NaN	NaN	NaN	NaN	NaN	NaN	NaN	NaN	NaN	NaN	NaN	NaN	NaN	NaN	NaN	NaN	NaN	NaN	NaN	NaN	NaN	NaN	NaN	NaN	NaN	NaN	NaN	NaN	NaN	NaN	NaN	NaN	NaN	NaN	NaN	NaN	NaN	NaN	NaN
NaN	NaN	NaN	NaN	NaN	NaN	NaN	NaN	NaN	NaN	NaN	NaN	NaN	NaN	NaN	NaN	NaN	NaN	NaN	NaN	NaN	NaN	NaN	NaN	NaN	NaN	NaN	NaN	NaN	NaN	NaN	NaN	NaN	NaN	NaN	NaN	NaN	NaN	NaN	NaN	NaN	NaN	NaN	NaN	NaN	NaN	NaN	NaN	NaN	NaN
NaN	NaN	NaN	NaN	NaN	NaN	NaN	NaN	NaN	NaN	NaN	NaN	NaN	NaN	NaN	NaN	NaN	NaN	NaN	NaN	NaN	NaN	NaN	NaN	NaN	NaN	NaN	NaN	NaN	NaN	NaN	NaN	NaN	NaN	NaN	NaN	NaN	NaN	NaN	NaN	NaN	NaN	NaN	NaN	NaN	NaN	NaN	NaN	NaN	NaN
NaN	NaN	NaN	NaN	NaN	NaN	NaN	NaN	NaN	NaN	NaN	NaN	NaN	NaN	NaN	NaN	NaN	NaN	NaN	NaN	NaN	NaN	NaN	NaN	NaN	NaN	NaN	NaN	NaN	NaN	NaN	NaN	NaN	NaN	NaN	NaN	NaN	NaN	NaN	NaN	NaN	NaN	NaN	NaN	NaN	NaN	NaN	NaN	NaN	NaN
NaN	NaN	NaN	NaN	NaN	NaN	NaN	NaN	NaN	NaN	NaN	NaN	NaN	NaN	NaN	NaN	NaN	NaN	NaN	NaN	NaN	NaN	NaN	NaN	NaN	NaN	NaN	NaN	NaN	NaN	NaN	NaN	NaN	NaN	NaN	NaN	NaN	NaN	NaN	NaN	NaN	NaN	NaN	NaN	NaN	NaN	NaN	NaN	NaN	NaN
NaN	NaN	NaN	NaN	NaN	NaN	NaN	NaN	NaN	NaN	NaN	NaN	NaN	NaN	NaN	NaN	NaN	NaN	NaN	NaN	NaN	NaN	NaN	NaN	NaN	NaN	NaN	NaN	NaN	NaN	NaN	NaN	NaN	NaN	NaN	NaN	NaN	NaN	NaN	NaN	NaN	NaN	NaN	NaN	NaN	NaN	NaN	NaN	NaN	NaN
NaN	NaN	NaN	NaN	NaN	NaN	NaN	NaN	NaN	NaN	NaN	NaN	NaN	NaN	NaN	NaN	NaN	NaN	NaN	NaN	NaN	NaN	NaN	NaN	NaN	NaN	NaN	NaN	NaN	NaN	NaN	NaN	NaN	NaN	NaN	NaN	NaN	NaN	NaN	NaN	NaN	NaN	NaN	NaN	NaN	NaN	NaN	NaN	NaN	NaN
NaN	NaN	NaN	NaN	NaN	NaN	NaN	NaN	NaN	NaN	NaN	NaN	NaN	NaN	NaN	NaN	NaN	NaN	NaN	NaN	NaN	NaN	NaN	NaN	NaN	NaN	NaN	NaN	NaN	NaN	NaN	NaN	NaN	NaN	NaN	NaN	NaN	NaN	NaN	NaN	NaN	NaN	NaN	NaN	NaN	NaN	NaN	NaN	NaN	NaN
[truncated: 974 more columns]

## Sheet: MRR2_time
736671
736671
736671
736671
736671
736671
736671
736671
736671
736671
736671
736671
736671
736671
736671
736671
736671
736671
736671
736671
736671
736671
736671
736671
736671
736671
736671
736671
736671
736671
736671
736671
736671
736671
736671
736671
736671
736671
736671
736671
736671
736671
736671
736671
736671
736671
736671
736671
736671
736671
736671
736671
736671
736671
736671
736671
736671
736671
736671
736671
736671
736671
736671
736671
736671
736671
736671
736671
736671
736671
736671
736671
736671
736671
736671
736671
736671
736671
736671
736671
736671
736671
736671
736671
736671
736671
736671
736671
736671
736671
736671
736671
736671
736671
736671
736671
736671
736671
736671
736671
736671
736671
736671
736671
736671
736671
736671
736671
736671
736671
736671
736671
736671
736671
736671
736671
736671
736671
736671
736671
736671
736671
736671
736671
736671
736671
736671
736671
736671
736671
736671
736671
736671
736671
736671
736671
736671
736671
736671
736671
736671
736671
736671
736671
736671
736671
736671
736671
736671
736671
736671
736671
736671
736671
736671
736671
736671
736671
736671
736671
736671
736671
736671
736671
736671
736671
736671
736671
736671
736671
736671
736671
736671
736671
736671
736671
736671
736671
736671
736671
736671
736671
736671
736671
736671
736671
736671
736671
736671
736671
736671
736671
736671
736671
736671
736671
736671
736671
736671
736671
736671
736671
736671
736671
736671
736671
736671
736671
736671
736671
736671
736671
736671
736671
736671
736671
736671
736671
736671
736671
736671
736671
736671
736671
736671
736671
736671
736671
736671
736671
736671
736671
736671
736671
736671
736671
736671
736671
736671
736671
736671
736671
736671
736671
736671
736671
736671
736671
736671
736671
736671
736671
736671
736671
736671
736671
736671
736671
736671
736671
736671
736671
736671
736671
736671
736671
736671
736671
736671
736671
736671
736671
736671
736671
736671
736671
736671
736671
736671
736671
736671
736671
736671
736671
736671
736671
736671
736671
736671
736671
736671
736671
736671
736671
736671
736671
736671
736671
736671
736671
736671
736671
736671
736671
736671
736671
736671
736671
736671
736671
736671
736671
736671
736671
736671
736671
736671
736671
736671
736671
736671
736671
736671
736671
736671
736671
736671
736671
736671
736671
736671
736671
736671
736671
736671
736671
736671
736671
736671
736671
736671
736671
736671
736671
736671
736671
736671
736671
736671
736671
736671
736671
736671
736671
736671
736671
736671
736671
736671
736671
736671
736671
736671
736671
736671
736671
736671
736671
736671
736671
736671
736671
736671
736671
736671
736671
736671
736671
736671
736671
736671
736671
736671
736671
736671
736671
736671
736671
736671
736671
736671
736671
736671
736671
736671
736671
736671
736671
736671
736671
736671
736671
736671
736671
736671
736671
736671
736671
736671
736671
736671
736671
736671
736671
736671
736671
736671
736671
736671
736671
736671
736671
736671
736671
736671
736671
736671
736671
736671
736671
736671
736671
736671
736671
736671
736671
736671
736671
736671
736671
736671
736671
736671
736671
736671
736671
736671
736671
736671
736671
736671
736671
736671
736671
736671
736671
736671
736671
736671
736671
736671
736671
736671
736671
736671
736671
736671
736671
736671
736671
736671
736671
736671
736671
736671
736671
736671
736671
736671
736671
736671
736671
736671
736671
736671
736671
736671
736671
736671
736671
736671
736671
736671
736671
736671
736671
736671
736671
736671
736671
736671
736671
736671
736671
736671
736671
736671
736671
736671
736671
736671
736671
736671
736671
736671
736671
736671
736671
736671
736671
736671
736671
736671
736671
736671
736671
736671
736671
736671
736671
736671
736671
736671
736671
736671
736671
736671
736671
736671
736671
736671
736671
736671
736671
736671
736671
736671
736671
736671
736671
736671
736671
736671
736671
736671
736671
736671
736671
736671
736671
736671
736671
736671
736671
736671
736671
736671
736671
736671
736671
736671
736671
736671
736671
736671
736671
736671
736671
736671
736671
736671
736671
736671
736671
736671
736671
736671
736671
736671
736671
736671
736671
736671
736671
736671
736671
736671
736671
736671
736671
736671
736671
736671
736671
736671
736671
736671
736671
736671
736671
736671
736671
736671
736671
736671
736671
736671
736671
736671
736671
736671
736671
736671
736671
736671
736671
736671
736671
736671
736671
736671
736671
736671
736671
736671
736671
736671
736671
736671
736671
736671
736671
736671
736671
736671
736671
736671
736671
736671
736671
736671
736671
736671
736671
736671
736671
736671
736671
736671
736671
736671
736671
736671
736671
736671
736671
736671
736671
736671
736671
736671
736671
736671
736671
736671
736671
736671
736671
736671
736671
736671
736671
736671
736671
736671
736671
736671
736671
736671
736671
736671
736671
736671
736671
736671
736671
736671
736671
736671
736671
736671
736671
736671
736671
736671
736671
736671
736671
736671
736671
736671
736671
736671
736671
736671
736671
736671
736671
736671
736671
736671
736671
736671
736671
736671
736671
736671
736671
736671
736671
736671
736671
736671
736671
736671
736671
736671
736671
736671
736671
736671
736671
736671
736671
736671
736671
736671
736671
736671
736671
736671
736671
736671
736671
736671
736671
736671
736671
736671
736671
736671
736671
736671
736671
736671
736671
736671
736671
736671
736671
736671
736671
736671
736671
736671
736671
736671
736671
736671
736671
736671
736671
736671
736671
736671
736671
736671
736671
736671
736671
736671
736671
736671
736671
736671
736671
736671
736671
736671
736671
736671
736671
736671
736671
736671
736671
736671
736671
736671
736671
736671
736671
736671
736671
736671
736671
736671
736671
736671
736671
736671
736671
736671
736671
736671
736671
736671
736671
736671
736671
736671
736671
736671
736671
736671
736671
736671
736671
736671
736671
736671
736671
736671
736671
736671
736671
736671
736671
736671
736671
736671
736671
736671
736671
736671
736671
736671
736671
736671
736671
736671
736671
736671
736671
736671
736671
736671
736671
736671
736671
736671
736671
736671
736671
736671
736671
736671
736671
736671
736671
736671
736671
736671
736671
736671
736671
736671
736671
736671
736671
736671
736671
736671
736671
736671
736671
736671
736671
736671
736671
736671
736671
736671
736671
736671
736671
736671
736671
736671
736671
736671
736671
736671
736671
736671
736671
736671
736671
736671
736671
736671
736671
736671
736671
736671
736671
736671
736671
736671
736671
736671
736671
736671
736671
736671
736671
736671
736671
736671
736671
736671
736671
736671
736671
736671
736671
736671
736671
736671
736671
736671
736671
736671
736671
736671
736671
736671
736671
736671
736671
736671
736671
736671
736671
736671
736671
736671
736671
736671
736671
736671
736671
736671
736671
736671
736671
736671
736671
736671
736671
736671
736671
736671
736671
736671
736671
736671
736671
736671
736671
736671
736671
736671
736671
736671
736671
736671
736671
736671
736671
736671
736671
736671
736671
736671
736671
736671
736671
736671
736671
736671
736671
736671
736671
736671
736671
736671
736671
736671
736671
736671
736671
736671
736671
736671
736671
736671
736671
736671
736671
736671
736671
736671
736671
736671
736671
736671
736671
736671
736671
736671
736671
736671
736671
736671
736671
736671
736671
736671
736671
736671
736671
736671
736671
736671
736671
736671
736671
736671
736671
736671
736671
736671
736671
736671
736671
736671
736671
736671
736671
736671
736671
736671
736671
736671
736671
736671
736671
736671
736671
736671
736671
736671
736671
736671
736671
736671
736671
736671
736671
736671
736671
736671
736671
736671
736671
736671
736671
736671
736671
736671
736671
736671
736671
736671
736671
736671
736671
736671
736671
736671
736671
736671
736671
736671
736671
736671
736671
736671
736671
736671
736671
736671
736671
736671
736671
736671
736671
736671
736671
736671
736671
736671
736671
736671
736671
736671
736671
736671
736671
736671
736671
736671
736671
736671
736671
736671
736671
736671
736671
736671
736671
736671
736671
736671
736671
736671
736671
736671
736671
736671
736671
736671
736671
736671
736671
736671
736671
736671
736671
736671
736671
736671
736671
736671
736671
736671
736671
736671
736671
736671
736671
736671
736671
736671
736671
736671
736671
736671
736671
736671
736671
736671
736671
736671
736671
736671
736671
736671
736671
736671
736671
736671
736671
736671
736671
736671
736671
736671
736671
736671
736671
736671
736671
736671
736671
736671
736671
736671
736671
736671
736671
736671
736671
736671
736671
736671
736671
736671
736671
736671
736671
736671
736671
736671
736671
736671
736671
736671
736671
736671
736671
736671
736671
736671
736671
736671
736671
736671
736671
736671
736671
736671
736671
736671
736671
736671
736671
736671
736671
736671
736671
736671
736671
736671
736671
736671
736671
736671
736671
736671
736671
736671
736671
736671
736671
736671
736671
736671
736671
736671
736671
736671
736671
736671
736671
736671
736671
736671
736671
736671
736671
736671
736671
736671
736671
736671
736671
736671
736671
736671
736671
736671
736671
736671
736671
736671
736671
736671
736671
736671
736671
736671
736671
736671
736671
736671
736671
736671
736671
736671
736671
736671
736671
736671
736671
736671
736671
736671
736671
736671
736671
736671
736671
736671
736671
736671
736671
736671
736671
736671
736671
736671
736671
736671
736671
736671
736671
736671
736671
736671
736671
736671
736671
736671
736671
736671
736671
736671
736671
736671
736671
736671
736671
736671
736671
736671
736671
736671
736671
736671
736671
736671
736671
736671
736671
736671
736671
736671
736671
736671
736671
736671
736671
736671
736671
736671
736671
736671
736671
736671
736671
736671
736671
736671
736671
736671
736671
736671
736671
736671
736671
736671
736671
736671
736671
736671
736671
736671
736671
736671
736671
736671
736671
736671
736671
736671
736671
736671
736671
736671
736671
736671
736671
736671
736671
736671
736671
736671
736671
736671
736671
736671
736671
736671
736671
736671
736671
736671
736671
736671
736671
736671
736671
736671
736671
736671
736671
736671
736671
736671
736671
736671
736671
736671
736671
736671
736671
736671
736671
736671
736671
736671
736671
736671
736671
736671
736671
736671
736671
736671
736671
736671
736671
736671
736671
736671
736671
736671
736671
736671
736671
736671
736671
736671
736671
736671
736671
736671
736671
736671
736671
736671
736671
736671
736671
736671
736671
736671
736671
736671
736671
736671
736671
736671
736671
736671
736671
736671
736671
736671
736671
736671
736671
736671
736671
736671
736671
736671
736671
736671
736671
736671
736671
736671
736671
736671
736671
736671
736671
736671
736671
736671
736671
736671
736671
736671
736671
736671
736671
736671
736671
736671
736671
736671
736671
736671
736671
736671
736671
736671
736671
736671
736671
736671
736671
736671
736671
736671
736671
736671
736671
736671
736671
736671
736671
736671
736671
736671
736671
736671
736671
736671
736671
736671
736671
736671
736671
736671
736671
736671
736671
736671
736671
736671
736671
736671
736671
736671
736671
736671
736671
736671
736671
736671
736671
736671
736671
736671
736671
736671
736671
736671
736671
736671
736671
736671
736671
736671
736671
736671
736671
736671
736671
736671
736671
736671
736671
736671
736671
736671
736671
736671
736671
736671
736671
736671
736671
736671
736671
736671
736671
736671
736671
736671
736671
736671
736671
736671
736671
736671
736671
736671
736671
736671
736671
736671
736671
736671
736671
736671
736671
736671
736671
736671
736671
736671
736671
736671
736671
736671
736671
736671
736671
736671
736671
736671
736671
736671
736671
736671
736671
736671
736671
736671
736671
736671
736671
736671
736671
736671
736671
736671
736671
736671
736671
736671
736671
736671
736671
736671
736671
736671
736671
736671
736671
736671
736671
736671
736671
736671
736671
736671
736671
736671
736671
736671
736671
736671
736671
736671
736671
736671
736671
736671
736671
736671
736671
736671
736671
736671
736671
736671
736671
736671
736671
736671
736671
736671
736671
736671
736671
736671
736671
736671
736671
736671
736671
736671
736671
736671
736671
736671
736671
736671
736671
736671
736671
736671
736671
736671
736671
736671
736671
736671
736671
736671
736671
736671
736671
736671
736671
736671
736671
736671
736671
736671
736671
736671
736671
736671
736671
736671
736671
736671
736671
736671
736671
736671
736671
736671
736671
736671
736671
736671
736671
736671
736671
736671
736671
736671
736671
736671
736671
736671
736671
736671
736671
736671
736671
736671
736671
736671
736671
736671
736671
736671
736671
736671
736671
736671
736671
736671
736671
736671
736671
736671
736671
736671
736671
736671
736671
736671
736671
736671
736671
736671
736671
736671
736671
736671
736671
736671
736671
736671
736671
736671
736671
736671
736671
736671
736671
736671
736671
736671
736671
736671
736671
736671
736671
736671
736671
736671
736671
736671
736671
736671
736671
736671
736671
736671
736671
736671
736671
736671
736671
736671
736671
736671
736671
736671
736671
736671
736671
736671
736671
736671
736671
736671
736671
736671
736671
736671
736671
736671
736671
736671
736671
736671
736671
736671
736671
736671
736671
736671
736671
736671
736671
736671
736671
736671
736671
736671
736671
736671
736671
736671
736671
736671
736671
736671
736671
736671
736671
736671
736671
736671
736671
736671
736671
736671
736671
736671
736671
736671
736671
736671
736671
736671
736671
736671
736671
736671
736671
736671
736671
736671
736671
736671
736671
736671
736671
736671
736671
736671
736671
736671
736671
736671
736671
736671
736671
736671
736671
736671
736671
736671
736671
736671
736671
736671
736671
736671
736671
736671
736671
736671
736671
736671
736671
736671
736671
736671
736671
736671
736671
736671
736671
736671
736671
736671
736671
736671
736671
736671
736671
736671
736671
736671
736671
736671
736671
736671
736671
736671
736671
736671
736671
736671
736671
[truncated: 3,796 more rows]

## Sheet: MRR2_levels_m
100
200
300
400
500
600
700
800
900
1000
1100
1200
1300
1400
1500
1600
1700
1800
1900
2000
2100
2200
2300
2400
2500
2600
2700
2800
2900
3000
3100

## Sheet: MRR2_Z_reflectivity
		NaN	NaN	NaN	NaN	NaN	NaN	NaN	NaN	NaN	NaN	NaN	NaN	NaN	NaN	NaN	NaN	NaN	NaN	NaN	NaN	NaN	NaN	NaN	NaN	NaN	NaN	NaN	NaN	11.58	12.71	10.13	2.75	NaN	NaN	NaN	NaN	NaN	NaN	0.69	NaN	1.64	3.49	4.38	11.51	10.97	12.59	15.61	8.43
		NaN	NaN	NaN	NaN	NaN	NaN	NaN	NaN	NaN	NaN	NaN	NaN	NaN	NaN	NaN	NaN	NaN	NaN	NaN	NaN	NaN	3.42	2.01	NaN	2.99	NaN	3.86	2.81	15.65	13.87	9.12	3.97	NaN	NaN	NaN	NaN	2.07	3.83	6.14	3.53	4.64	7.82	8.15	12.83	13.85	15.51	17.4	10.17
		NaN	NaN	NaN	NaN	NaN	NaN	NaN	NaN	NaN	NaN	NaN	NaN	NaN	NaN	NaN	NaN	NaN	NaN	NaN	NaN	5.72	5.95	5.92	NaN	4.3	2.25	5.15	3.84	13.74	8.96	NaN	4.04	NaN	NaN	1.19	3.98	5.1	7.16	8.34	5.8	5.55	8.73	10.23	12.41	14.71	14.88	16.72	9.88
		NaN	NaN	NaN	NaN	NaN	NaN	NaN	NaN	NaN	NaN	NaN	NaN	NaN	NaN	NaN	NaN	NaN	NaN	NaN	NaN	7.84	5.85	7.13	3.29	4.12	5.4	6.66	5.23	6.85	NaN	NaN	3.72	NaN	NaN	3.76	6.12	4.92	6.6	8.33	7.49	6.56	10.43	11.33	12.8	11.77	11.1	14.89	8.63
		NaN	NaN	NaN	NaN	NaN	NaN	NaN	NaN	NaN	NaN	NaN	NaN	NaN	NaN	NaN	NaN	NaN	NaN	NaN	NaN	6.19	8.11	10.82	6.56	5.38	7.27	7.52	6.93	NaN	NaN	NaN	2.93	NaN	NaN	3.22	5.27	2.85	5.88	8.07	9.02	8.8	11.75	11.98	12.01	7.6	7.24	12.26	5.88
		NaN	NaN	NaN	NaN	NaN	NaN	NaN	NaN	NaN	NaN	NaN	NaN	NaN	NaN	NaN	NaN	NaN	NaN	NaN	NaN	7.09	10.46	11.59	7.51	6.21	8.58	7.76	9.86	NaN	NaN	NaN	0.99	NaN	NaN	1.86	2.92	5.77	5.16	10.35	10.38	10.97	12.74	12.9	9.7	6.98	7.01	9.67	0.99
		NaN	NaN	NaN	NaN	NaN	NaN	NaN	NaN	NaN	NaN	NaN	NaN	NaN	2.57	4.77	NaN	NaN	NaN	NaN	NaN	7.98	11.45	10.7	7.97	7.14	9.08	9.81	14.52	NaN	NaN	NaN	NaN	NaN	NaN	1.74	4.03	7.75	6.48	11.48	10.57	11.37	12.87	13.44	8.02	5.7	5.02	7.47	NaN
		NaN	NaN	NaN	NaN	NaN	NaN	NaN	NaN	NaN	NaN	NaN	NaN	NaN	3.88	5.71	NaN	NaN	NaN	NaN	NaN	8.41	10.94	7.75	7.88	8.63	10.38	13.49	18.11	NaN	NaN	NaN	NaN	NaN	NaN	2.03	4.12	7.6	6.99	10.75	10.1	11.21	12.6	13.05	8.88	7.07	2.29	5.04	NaN
		NaN	NaN	NaN	NaN	3.5	NaN	NaN	NaN	NaN	NaN	NaN	NaN	NaN	NaN	3.27	NaN	NaN	NaN	NaN	2.16	9.32	8.62	3.49	9.31	10.53	12.79	16.94	19.3	NaN	NaN	NaN	NaN	NaN	NaN	1.36	7.41	9.17	8.75	9.4	10.35	12.28	12.7	12.22	10.49	7.93	4.1	1.56	NaN
		NaN	NaN	NaN	NaN	NaN	NaN	NaN	NaN	NaN	NaN	NaN	NaN	NaN	NaN	2.45	NaN	NaN	NaN	NaN	3.95	8.93	7.93	NaN	11.39	11.95	14.52	19.4	19.05	NaN	NaN	NaN	NaN	NaN	NaN	3.04	6.25	9.5	9.35	8.67	10.39	13.07	12.31	11.81	11.11	8.17	4.89	NaN	NaN
		NaN	NaN	NaN	NaN	NaN	NaN	NaN	NaN	NaN	NaN	NaN	NaN	NaN	NaN	2.95	NaN	NaN	NaN	NaN	5.66	7.95	6.13	NaN	12.8	13.71	15.87	20.24	18.13	NaN	NaN	2.24	NaN	NaN	0.26	0.97	NaN	7.32	8.4	9.5	10.47	13.19	12.87	11.04	10.87	9.26	6.41	0.34	NaN
		NaN	NaN	NaN	NaN	NaN	NaN	NaN	NaN	NaN	NaN	NaN	NaN	NaN	NaN	NaN	NaN	NaN	NaN	4.03	7.75	4.19	6.32	NaN	12.82	14.86	17.38	19.69	15.38	NaN	NaN	NaN	NaN	NaN	1.32	NaN	NaN	2.69	7.74	7.13	10.7	11.95	13.01	10.12	10.21	9.57	7.18	1.6	NaN
		NaN	NaN	NaN	NaN	NaN	NaN	NaN	NaN	NaN	NaN	NaN	NaN	NaN	NaN	NaN	NaN	NaN	NaN	6.11	8.36	1.97	6.46	NaN	12.26	14.73	18.43	17.64	12.7	NaN	NaN	NaN	NaN	NaN	0.5	NaN	NaN	NaN	4.17	2.98	10.74	11.35	12.21	9.84	8.83	8.19	4.45	1.2	1.61
		NaN	NaN	NaN	NaN	NaN	NaN	NaN	NaN	NaN	NaN	NaN	NaN	NaN	NaN	NaN	NaN	NaN	NaN	7.27	9.1	3.38	5.75	NaN	12.31	14.37	18.63	14.16	9.76	NaN	NaN	NaN	NaN	NaN	NaN	NaN	NaN	NaN	NaN	NaN	10.86	11.34	10.88	10.06	8.85	5.5	8.92	1.24	4.89
		NaN	NaN	NaN	NaN	NaN	NaN	NaN	NaN	NaN	NaN	NaN	NaN	NaN	NaN	NaN	NaN	NaN	2.19	7.23	9.79	0.07	5.02	NaN	11.96	14.43	17.56	11.67	7.14	NaN	NaN	NaN	NaN	NaN	1.1	NaN	6.45	NaN	NaN	NaN	11.39	10.93	9.19	9.48	8.01	1.19	9.36	0.56	5.79
		NaN	NaN	NaN	NaN	NaN	NaN	NaN	NaN	NaN	NaN	NaN	NaN	NaN	NaN	NaN	NaN	1.19	3.59	6.88	9.28	NaN	NaN	NaN	11.36	13.84	15.09	9.62	4.26	NaN	NaN	NaN	NaN	NaN	2.17	NaN	1.27	0.44	NaN	NaN	11.96	10.15	9	9.41	1.87	NaN	NaN	1.69	5.51
		NaN	NaN	NaN	NaN	NaN	NaN	NaN	NaN	NaN	NaN	NaN	NaN	NaN	NaN	NaN	3.53	4.31	5.47	7.17	8.57	NaN	NaN	NaN	10.83	11.97	12.07	7.34	NaN	NaN	NaN	NaN	NaN	NaN	0.44	NaN	NaN	NaN	NaN	NaN	11.91	9.39	9.22	9.71	NaN	3.47	NaN	5.53	4.22
		NaN	NaN	NaN	NaN	NaN	NaN	NaN	NaN	NaN	NaN	NaN	NaN	NaN	NaN	NaN	6.41	5.36	7.14	6.8	7.5	NaN	NaN	NaN	9.37	10.21	8.53	2.46	NaN	NaN	NaN	NaN	NaN	NaN	NaN	NaN	NaN	NaN	NaN	NaN	11.37	8.08	9.12	9.9	NaN	5.39	NaN	8.22	4.32
		NaN	NaN	NaN	NaN	NaN	NaN	NaN	NaN	NaN	NaN	NaN	NaN	NaN	NaN	NaN	7.16	6.06	7.38	6.58	6.06	NaN	NaN	NaN	7.51	8.05	1.92	NaN	NaN	NaN	NaN	1.06	NaN	NaN	1.83	NaN	NaN	NaN	0.27	3.87	10.71	6.3	9.79	9.45	NaN	NaN	0.97	9.77	4.7
		NaN	NaN	NaN	NaN	NaN	NaN	NaN	NaN	NaN	NaN	NaN	NaN	NaN	NaN	NaN	6.39	4.9	7.32	8.05	3.03	NaN	NaN	NaN	6.23	3.81	NaN	NaN	NaN	NaN	NaN	NaN	NaN	NaN	NaN	NaN	NaN	NaN	NaN	NaN	9.71	7.29	9.67	9.56	NaN	NaN	NaN	10.6	5.56
		NaN	NaN	NaN	NaN	NaN	NaN	1.54	NaN	NaN	NaN	NaN	NaN	NaN	NaN	NaN	4.23	5.17	6.07	9.04	1.43	NaN	NaN	NaN	4.78	NaN	NaN	NaN	NaN	NaN	NaN	NaN	NaN	NaN	2.62	NaN	NaN	1.23	NaN	5.96	9.53	8.47	8.57	9.08	NaN	NaN	NaN	10.2	9.95
		NaN	NaN	NaN	NaN	NaN	2.32	2.26	NaN	NaN	NaN	NaN	2.84	NaN	NaN	NaN	2.36	3.79	4.8	7.72	1.45	NaN	NaN	NaN	2.83	NaN	NaN	NaN	NaN	NaN	0.07	NaN	1.26	NaN	2.19	NaN	NaN	NaN	NaN	NaN	8.23	9.14	9.29	8.56	NaN	0.61	NaN	9.47	11.09
		NaN	NaN	NaN	NaN	NaN	4.31	NaN	1.59	NaN	NaN	NaN	NaN	NaN	NaN	NaN	4.39	4.07	4.21	7.26	NaN	NaN	4.26	NaN	NaN	NaN	NaN	NaN	NaN	NaN	5.64	NaN	NaN	2.95	2.58	NaN	NaN	NaN	NaN	NaN	7.22	7.79	10.43	9.23	NaN	0.47	NaN	10.73	10.78
		NaN	NaN	NaN	NaN	NaN	NaN	NaN	NaN	NaN	NaN	NaN	NaN	NaN	NaN	2.46	4.56	2.7	3.05	3.82	NaN	NaN	NaN	NaN	NaN	NaN	NaN	NaN	NaN	NaN	NaN	0.45	NaN	NaN	2.13	NaN	NaN	NaN	NaN	NaN	6.97	9.35	9.14	8.5	NaN	NaN	NaN	12.25	10.13
		NaN	NaN	NaN	NaN	0.09	NaN	NaN	NaN	NaN	NaN	NaN	NaN	NaN	2.76	NaN	5.76	2.59	4.52	NaN	NaN	NaN	NaN	NaN	0.67	NaN	NaN	NaN	NaN	NaN	NaN	8.21	NaN	0.74	0.61	NaN	NaN	NaN	1.55	2.89	6.38	8.38	10.16	9.2	NaN	NaN	NaN	12.82	7.99
		NaN	NaN	NaN	NaN	NaN	NaN	NaN	NaN	NaN	NaN	NaN	NaN	0.33	NaN	NaN	3.92	NaN	3.93	NaN	1.23	NaN	3.64	NaN	0.75	NaN	NaN	NaN	NaN	NaN	2.88	NaN	NaN	NaN	NaN	NaN	NaN	4.66	1.43	NaN	6.57	8.7	9.51	10.19	NaN	NaN	NaN	12.43	7.02
		NaN	NaN	NaN	NaN	4.28	NaN	NaN	NaN	NaN	NaN	NaN	NaN	2.53	NaN	NaN	4.01	3.12	1.57	NaN	4.19	NaN	2.53	2.73	0.03	3.68	NaN	3.44	NaN	NaN	NaN	4.86	NaN	NaN	1.19	1.1	NaN	NaN	NaN	NaN	6.11	8.86	8.55	10.68	1.83	NaN	2.42	13	9.69
		0.08	NaN	NaN	NaN	0.52	NaN	NaN	NaN	NaN	NaN	NaN	NaN	14.07	NaN	12.38	5.59	5.43	NaN	0.57	4.37	0.02	NaN	2.41	2	NaN	NaN	0.51	NaN	5.88	NaN	NaN	NaN	NaN	8.31	0.82	NaN	0.53	NaN	NaN	4.05	9.57	8.43	10.5	NaN	5.77	1.28	13.54	12.74
		1.01	NaN	NaN	NaN	5.74	1.92	2.87	NaN	0.1	NaN	NaN	1.29	NaN	6.49	5.25	5.49	5.69	NaN	NaN	4.84	NaN	NaN	2.43	NaN	NaN	NaN	NaN	NaN	NaN	5.36	4.81	NaN	NaN	NaN	NaN	3.41	10.04	NaN	NaN	4.43	10.77	8.72	12.31	NaN	NaN	NaN	13.65	13.83
		NaN	NaN	NaN	NaN	7.61	NaN	NaN	NaN	NaN	NaN	NaN	0.67	NaN	6.9	7.07	4.04	5.46	0.06	NaN	1.84	4.79	3.92	5.59	NaN	NaN	0.23	NaN	0.71	NaN	5.77	NaN	NaN	0.51	1.74	NaN	NaN	7.92	0.06	5.38	6.41	12.03	10.74	12.71	NaN	NaN	NaN	13.49	14.7
		0.55	7.22	4.49	2.91	6.45	NaN	NaN	8.19	1.57	3.16	1.25	0.53	5.16	6.51	9.88	4.58	10.83	9.69	4.36	1.25	13.45	3.66	3.4	0.29	NaN	4.88	NaN	NaN	NaN	8.22	NaN	NaN	NaN	NaN	3.1	7.31	13.93	NaN	0.12	6.95	10.49	10.31	13.12	NaN	0.48	5.39	13.43	15.49
[truncated: 974 more columns]

## Sheet: isotope_vapour
time_10min	delta_18O_10min	delta_D_10min	d_10min	q_10min	P_hPa_10min	delta_18O_10min_SD	delta_D_10min_SD	d_10min_SD	q_10min_SD	P_hPa_10min_SD
17142	-16.8215	-123.89	10.6827	4.20591	1016.71	0.10326	0.435738	0.852872	0.018348	0.0322147
17142	-16.6867	-122.96	10.5339	4.25816	1016.56	0.107121	0.55285	0.866554	0.0137036	0.0674159
17142	-16.5303	-121.842	10.4001	4.2792	1016.42	0.0989077	0.454496	0.86945	0.00724994	0.0527538
17142	-16.4758	-121.284	10.522	4.29735	1016.1	0.0998683	0.385178	0.895076	0.0127355	0.102916
17142	-16.3981	-120.77	10.4149	4.33249	1015.87	0.0958436	0.378106	0.891105	0.0087574	0.0417162
17142	-16.3856	-120.741	10.3443	4.35133	1015.67	0.0979633	0.401022	0.842647	0.014381	0.0827947
17142	-16.3254	-120.249	10.3541	4.35284	1015.38	0.0989488	0.388387	0.912983	0.0135343	0.0568022
17142	-16.3302	-120.246	10.3956	4.32995	1015.19	0.0954387	0.433316	0.85567	0.011783	0.0814644
17142.1	-16.2902	-120.017	10.3048	4.33061	1015.07	0.101185	0.387527	0.87609	0.0167862	0.0600404
17142.1	-16.4096	-120.732	10.5452	4.27856	1014.91	0.105233	0.386025	0.913432	0.00944588	0.0595554
17142.1	-16.4332	-120.897	10.5682	4.25662	1014.7	0.101107	0.47289	0.870677	0.017564	0.0803069
17142.1	-16.2907	-119.935	10.3909	4.30381	1014.57	0.101673	0.468729	0.870432	0.0169307	0.0438437
17142.1	-16.2051	-119.276	10.3647	4.33671	1014.42	0.103328	0.433211	0.90841	0.0127615	0.0846562
17142.1	-16.1126	-118.69	10.2103	4.34947	1014.18	0.0990907	0.413461	0.879816	0.0144968	0.100538
17142.1	-16.089	-118.462	10.2497	4.32068	1013.92	0.0952781	0.400055	0.901628	0.0110122	0.0497891
17142.1	-16.1244	-118.557	10.4384	4.31616	1013.76	0.101434	0.405809	0.896209	0.0107689	0.0627582
17142.1	-16.2113	-118.848	10.8424	4.30327	1013.46	0.101177	0.384517	0.927676	0.0128322	0.121223
17142.1	-16.2484	-118.939	11.0489	4.27266	1013.1	0.101368	0.420808	0.932457	0.00797581	0.0973011
17142.1	-16.3353	-119.307	11.376	4.25327	1012.87	0.112754	0.518867	0.896805	0.0175227	0.0645684
17142.1	-16.5216	-120.482	11.69	4.21861	1012.62	0.127234	0.632944	0.925604	0.0164105	0.0909932
17142.1	-16.8154	-122.169	12.3544	4.19252	1012.37	0.124785	0.596507	0.879802	0.00642505	0.0594702
17142.1	-17.1683	-124.233	13.1131	4.19425	1012.19	0.195555	1.0344	1.02738	0.0188766	0.0783055
17142.2	-17.4813	-126.475	13.3759	4.22759	1012.01	0.13472	0.731854	0.920677	0.0216612	0.0661788
17142.2	-17.8871	-129.361	13.7356	4.26316	1011.71	0.208594	1.39468	0.952746	0.0168774	0.0946677
17142.2	-18.5647	-134.355	14.1628	4.28189	1011.41	0.284289	1.79885	1.01283	0.0165085	0.131968
17142.2	-19.0816	-138.219	14.4333	4.3253	1011.13	0.250415	1.44827	0.999864	0.024491	0.0766476
17142.2	-19.7559	-142.847	15.2	4.32763	1010.83	0.217337	1.38823	0.918707	0.0121129	0.0813517
17142.2	-20.177	-146.071	15.3452	4.39528	1010.64	0.121879	0.734534	0.908098	0.0303724	0.0836866
17142.2	-20.3875	-147.967	15.1331	4.50386	1010.42	0.142414	0.752305	0.894656	0.0310229	0.0662722
17142.2	-20.7044	-150.255	15.3802	4.56012	1010.15	0.134302	0.801408	0.945679	0.0152101	0.0792385
17142.2	-21.0046	-152.901	15.1356	4.63352	1009.88	0.156475	1.04524	0.912666	0.0215518	0.0796764
17142.2	-21.456	-156.368	15.2807	4.68674	1009.59	0.164647	1.15345	0.912743	0.0139797	0.0668274
17142.2	-21.9383	-160.207	15.2994	4.73474	1009.36	0.142368	1.03909	0.847197	0.019029	0.0688316
17142.2	-22.3348	-163.571	15.1067	4.79907	1009.19	0.140747	1.00246	0.88154	0.0231207	0.0694638
17142.2	-22.7002	-166.778	14.823	4.86905	1009.08	0.134033	0.982068	0.846523	0.024803	0.0558299
17142.2	-23.114	-170.246	14.6661	4.95005	1009.08	0.152288	1.14375	0.832858	0.020592	0.0760543
17142.2	-23.4983	-173.351	14.6357	5.02722	1008.84	0.163956	1.01609	0.844171	0.0240099	0.101549
17142.3	-23.983	-177.017	14.8466	5.10012	1008.65	0.177193	1.04941	0.830139	0.02581	0.088112
17142.3	-24.4189	-180.141	15.21	5.18108	1008.38	0.136639	0.794193	0.827769	0.0237958	0.0868092
17142.3	-24.7565	-182.823	15.2286	5.26656	1008.13	0.126304	0.820242	0.836965	0.0252683	0.0730914
17142.3	-24.9788	-184.684	15.1467	5.34282	1007.93	0.0973967	0.517432	0.837533	0.0243967	0.0327359
17142.3	-25.11	-185.626	15.2539	5.38926	1008.01	0.0983125	0.447194	0.823582	0.00701964	0.0485011
17142.3	-25.0797	-185.466	15.1714	5.43467	1008.01	0.0938977	0.445253	0.819932	0.0190599	0.0382375
17142.3	-24.8912	-183.856	15.273	5.50616	1008.02	0.10025	0.599751	0.808646	0.019373	0.0367618
17142.3	-24.7222	-182.255	15.5229	5.55312	1008.01	0.115739	0.62247	0.829366	0.0131917	0.0397412
17142.3	-24.4451	-179.974	15.587	5.60828	1007.87	0.114982	0.795045	0.833604	0.0176089	0.0724595
17142.3	-24.1703	-177.882	15.4801	5.64916	1007.74	0.117012	0.609651	0.786602	0.00936886	0.0290521
17142.3	-23.816	-175.271	15.2577	5.69086	1007.65	0.155896	1.00319	0.84956	0.0117828	0.0554133
17142.3	-23.3852	-172.067	15.0142	5.71763	1007.47	0.135125	0.912986	0.780339	0.00458475	0.0754026
17142.3	-23.0454	-169.484	14.8784	5.73627	1007.34	0.121881	0.707978	0.81431	0.00790562	0.0481782
17142.3	-22.6711	-166.972	14.3965	5.78026	1007.29	0.148199	0.860303	0.847998	0.019889	0.0492263
17142.4	-22.3705	-164.728	14.2361	5.82067	1007.11	0.0994187	0.504657	0.769508	0.00590617	0.0900138
17142.4	-22.1941	-163.383	14.1691	5.83771	1007.01	0.0962613	0.464287	0.792973	0.00571038	0.0376545
17142.4	-22.0019	-162.063	13.9523	5.86721	1006.92	0.106415	0.547481	0.830864	0.0106478	0.0508936
17142.4	-21.7477	-160.386	13.5949	5.91653	1006.88	0.111309	0.57044	0.820367	0.0138092	0.0363791
17142.4	-21.5319	-158.939	13.3165	5.96774	1006.86	0.0995997	0.519471	0.804348	0.0143124	0.0520324
17142.4	-21.3698	-157.891	13.0675	6.0123	1006.77	0.0897843	0.371984	0.782826	0.00821742	0.0370343
17142.4	-21.2843	-157.314	12.9608	6.04476	1006.74	0.085275	0.361554	0.770936	0.0111517	0.0443981
17142.4	-21.2134	-156.985	12.7221	6.07792	1006.57	0.0896326	0.342235	0.836495	0.00913437	0.0825012
17142.4	-21.1285	-156.641	12.3874	6.10764	1006.41	0.102047	0.449043	0.801803	0.0136306	0.0523779
17142.4	-20.9784	-155.605	12.2216	6.13353	1006.26	0.0975051	0.456875	0.801334	0.00629787	0.0489098
17142.4	-20.8963	-155.141	12.0292	6.1207	1006.12	0.0865684	0.337581	0.784532	0.00612072	0.0532308
17142.4	NaN	NaN	NaN	NaN	1005.95	NaN	NaN	NaN	NaN	0.0523058
17142.4	NaN	NaN	NaN	NaN	1005.76	NaN	NaN	NaN	NaN	0.0646106
17142.4	NaN	NaN	NaN	NaN	1005.63	NaN	NaN	NaN	NaN	0.0544813
17142.5	NaN	NaN	NaN	NaN	1005.48	NaN	NaN	NaN	NaN	0.0756061
17142.5	NaN	NaN	NaN	NaN	1005.33	NaN	NaN	NaN	NaN	0.0465325
17142.5	NaN	NaN	NaN	NaN	1005.13	NaN	NaN	NaN	NaN	0.0664139
17142.5	-20.4313	-152.398	11.0517	6.17996	1004.98	0.0843047	0.35021	0.802905	0.00251037	0.058741
17142.5	-20.4048	-152.215	11.0227	6.18587	1004.86	0.0893427	0.36885	0.81499	0.00721296	0.0514698
17142.5	-20.3438	-151.878	10.8726	6.22049	1004.75	0.0878283	0.362047	0.797356	0.0146225	0.040369
17142.5	-20.3101	-151.747	10.7335	6.24447	1004.63	0.0897873	0.356806	0.843177	0.00351426	0.0586789
17142.5	-20.2726	-151.715	10.4664	6.24666	1004.47	0.0892486	0.34691	0.806985	0.00422076	0.0706427
17142.5	-20.1792	-151.236	10.1975	6.2587	1004.31	0.0892225	0.357768	0.772424	0.00777605	0.0471335
17142.5	-20.1789	-151.282	10.1495	6.27094	1004.28	0.0816754	0.36975	0.720818	0.0034961	0.028799
17142.5	-20.2562	-151.921	10.1283	6.2869	1004.19	0.0916978	0.402987	0.815223	0.0063715	0.0417723
17142.5	-20.3723	-152.777	10.202	6.31612	1004.12	0.0878973	0.404774	0.782729	0.00992647	0.0287674
17142.5	-20.4462	-153.381	10.1888	6.3445	1004.1	0.0831002	0.366606	0.782653	0.00996669	0.0418828
17142.5	-20.4188	-153.513	9.83678	6.37609	1003.98	0.0828959	0.326216	0.769884	0.00890656	0.0476242
17142.5	-20.3972	-153.511	9.66674	6.40889	1003.8	0.0869037	0.336581	0.808264	0.0090837	0.0375048
17142.6	-20.3807	-153.517	9.52901	6.42289	1003.71	0.0846529	0.359977	0.782623	0.00523243	0.0479596
17142.6	-20.474	-154.267	9.5248	6.43351	1003.66	0.0928544	0.431404	0.815282	0.00533505	0.0281085
17142.6	-20.6457	-155.832	9.33337	6.44455	1003.65	0.10328	0.624747	0.808087	0.0102533	0.0372316
17142.6	-20.8787	-157.873	9.15702	6.47355	1003.61	0.110936	0.714225	0.816863	0.00621489	0.0367639
17142.6	-21.1017	-159.818	8.99581	6.46035	1003.42	0.0865383	0.491469	0.797466	0.00363067	0.0970329
17142.6	-21.2044	-160.975	8.66002	6.47751	1003.33	0.087826	0.477991	0.797147	0.010542	0.101305
17142.6	-21.2397	-161.7	8.21697	6.5167	1003.56	0.0851755	0.35787	0.779861	0.00989511	0.0842325
17142.6	-21.2277	-161.885	7.93645	6.52139	1003.68	0.11478	0.613129	0.786068	0.00307375	0.0998835
17142.6	-20.9072	-159.851	7.40664	6.53601	1003.72	0.126167	0.647668	0.818808	0.0117029	0.0863906
17142.6	-20.5271	-157.234	6.98305	6.57566	1003.59	0.109244	0.717457	0.812929	0.00513637	0.075883
17142.6	-20.1283	-154.255	6.77109	6.60351	1003.5	0.171385	1.12526	0.795422	0.0116348	0.0528958
17142.6	-19.7476	-151.541	6.43941	6.62617	1003.41	0.147251	0.833144	0.861316	0.011427	0.0278887
17142.6	-19.3111	-148.487	6.00242	6.6617	1003.28	0.165609	1.0441	0.832607	0.0103144	0.0864751
17142.6	-18.76	-144.381	5.69957	6.70476	1003.07	0.1979	1.40084	0.791604	0.0144793	0.0611645
17142.7	-18.1231	-139.552	5.43355	6.75717	1002.8	0.174205	1.22425	0.790567	0.0113472	0.0779876
17142.7	-17.5229	-135.048	5.13485	6.83253	1002.65	0.215713	1.57243	0.800095	0.029658	0.0951935
17142.7	-17.039	-131.321	4.99133	6.91013	1002.73	0.122927	0.739841	0.7815	0.0123399	0.0589397
17142.7	-16.9481	-130.331	5.25368	6.89146	1002.61	0.0885737	0.397989	0.798684	0.0199838	0.0510245
17142.7	-16.5935	-127.775	4.97314	6.8987	1002.65	0.186641	1.30381	0.764487	0.0125346	0.0333253
17142.7	-16.0482	-123.691	4.69431	6.94034	1002.71	0.140898	0.943085	0.766142	0.00708235	0.0430761
17142.7	-15.7674	-121.395	4.74432	6.94664	1002.58	0.104447	0.619856	0.749435	0.00715757	0.0641058
17142.7	-15.5923	-120.168	4.57014	6.9479	1002.32	0.0958092	0.467822	0.793014	0.00561436	0.0734047
17142.7	-15.44	-119.061	4.45956	6.9587	1002.16	0.112279	0.615327	0.851482	0.017656	0.080304
17142.7	-15.2218	-117.63	4.14442	6.98425	1001.91	0.0967453	0.472201	0.766109	0.0084822	0.0428814
17142.7	-15.0891	-116.604	4.10931	7.01428	1001.94	0.111201	0.642104	0.778189	0.0199522	0.0627647
17142.7	-14.8576	-114.859	4.0023	7.05604	1001.94	0.0990061	0.536171	0.779923	0.0161449	0.0632439
17142.7	-14.7184	-113.764	3.98393	7.08147	1001.94	0.0896119	0.364648	0.81732	0.00873763	0.0535183
17142.7	-14.6515	-113.233	3.97862	7.09368	1001.89	0.0834939	0.372632	0.764267	0.0151247	0.0610536
17142.8	-14.6118	-113.025	3.8695	7.09283	1001.81	0.0828978	0.32606	0.772552	0.0121135	0.0451826
17142.8	-14.4536	-111.853	3.7765	7.12025	1001.85	0.105039	0.564202	0.804999	0.0125193	0.0336159
17142.8	-14.3177	-110.875	3.66672	7.1157	1001.98	0.0889624	0.34966	0.819028	0.0100682	0.0416027
17142.8	-14.237	-110.39	3.50578	7.10964	1001.87	0.0859767	0.388166	0.761796	0.00917443	0.0461642
17142.8	-14.2143	-110.277	3.4371	7.11024	1001.94	0.0922089	0.39137	0.839133	0.012071	0.0525642
17142.8	-14.1435	-109.988	3.15937	7.10296	1001.87	0.0855165	0.345214	0.77249	0.0110563	0.0523275
17142.8	-14.0823	-109.588	3.07004	7.10859	1001.79	0.0947465	0.453198	0.799816	0.00864316	0.0572861
17142.8	-13.9135	-108.457	2.85108	7.12393	1001.78	0.0957949	0.474599	0.800505	0.00760376	0.0452624
17142.8	-13.8766	-107.929	3.08332	7.13761	1001.69	0.094537	0.347672	0.843193	0.00775871	0.0704742
17142.8	-13.9818	-108.566	3.2882	7.15627	1001.67	0.0911907	0.397042	0.79456	0.0238481	0.0371947
17142.8	-13.8433	-107.832	2.91406	7.21786	1001.69	0.0859674	0.369037	0.795002	0.0156685	0.030439
17142.8	-13.8431	-107.627	3.1176	7.2655	1001.45	0.0862702	0.341508	0.820311	0.0141057	0.146069
17142.8	-13.8679	-107.47	3.47298	7.32988	1001.21	0.0841517	0.350347	0.766622	0.0152649	0.0619586
17142.8	-13.8129	-106.816	3.68716	7.38179	1001.42	0.129091	0.727987	0.782257	0.0338538	0.0689981
17142.8	-13.4608	-104.655	3.03151	7.44098	1001.3	0.140649	0.764383	0.807582	0.0159698	0.0326654
17142.9	-13.1714	-102.764	2.60781	7.47194	1001.13	0.102787	0.523415	0.793886	0.0134981	0.0968628
17142.9	-12.9953	-101.699	2.26311	7.49388	1000.93	0.0967907	0.465551	0.750273	0.0201727	0.0403663
17142.9	-12.8325	-100.573	2.08624	7.53333	1000.91	0.0875598	0.390755	0.809831	0.0215977	0.0354997
17142.9	-12.8343	-100.466	2.2084	7.53676	1000.69	0.0887376	0.350291	0.817983	0.0108792	0.10234
17142.9	-12.89	-100.695	2.42442	7.53556	1000.75	0.0853803	0.373502	0.786873	0.0105043	0.0502508
17142.9	-12.9343	-100.844	2.62977	7.53385	1000.6	0.086588	0.349784	0.773395	0.00933501	0.0845552
17142.9	-13.3051	-102.923	3.51757	7.55865	1000.5	0.130722	0.791857	0.745343	0.0213361	0.0310842
17142.9	-13.1459	-101.78	3.38705	7.59936	1000.49	0.112674	0.587925	0.813552	0.0166476	0.0384832
17142.9	-12.8966	-100.278	2.89457	7.62691	1000.31	0.113055	0.558152	0.789775	0.0132194	0.0664669
17142.9	-12.6391	-98.9123	2.20068	7.66404	1000.29	0.109467	0.490057	0.83863	0.0141282	0.0407158
17142.9	-12.5394	-98.4077	1.90733	7.66834	1000.25	0.0896691	0.378734	0.795704	0.0156071	0.0600491
17142.9	-12.5044	-98.4584	1.57686	7.69334	1000.08	0.0854016	0.334861	0.78581	0.0178308	0.0905834
17142.9	-12.4406	-98.209	1.31577	7.71797	999.889	0.0930512	0.402522	0.828314	0.0226753	0.0500982
17142.9	-12.3489	-97.8761	0.914994	7.74766	999.895	0.149883	0.950845	0.82484	0.0162845	0.0661719
17143	-13.0154	-103.012	1.11106	7.75824	999.742	0.131961	0.850283	0.847988	0.0156539	0.0648379
17143	-12.9308	-102.868	0.578993	7.77519	999.765	0.152095	0.914931	0.770345	0.0131023	0.0661213
17143	NaN	NaN	NaN	NaN	999.661	NaN	NaN	NaN	NaN	0.0924876
17143	NaN	NaN	NaN	NaN	999.578	NaN	NaN	NaN	NaN	0.067411
17143	NaN	NaN	NaN	NaN	999.64	NaN	NaN	NaN	NaN	0.0554397
17143	NaN	NaN	NaN	NaN	999.653	NaN	NaN	NaN	NaN	0.0512273
17143	NaN	NaN	NaN	NaN	999.648	NaN	NaN	NaN	NaN	0.0567804
17143	-11.8587	-95.5932	-0.7236	8.00236	999.549	0.077846	0.365093	0.745269	0.0237009	0.0862365
17143	-12.0371	-96.8402	-0.543441	7.96876	999.664	0.11342	0.716614	0.804813	0.0471913	0.0475533
17143	-12.1758	-98.3861	-0.979511	7.81409	999.767	0.0821798	0.408783	0.772038	0.0315587	0.0787657
17143	-12.1856	-98.7873	-1.30267	7.71374	999.765	0.0881596	0.391386	0.841465	0.0330006	0.0706865
17143	-12.3002	-99.7541	-1.3523	7.65074	999.788	0.109133	0.602889	0.796891	0.0093725	0.067324
17143	-12.5442	-101.349	-0.99509	7.62059	999.933	0.0999244	0.514346	0.781626	0.00963732	0.0951204
17143	-13.2524	-105.979	0.0401417	7.57994	1000.05	0.267443	1.79778	0.935824	0.0250907	0.0658234
17143	-14.4591	-113.912	1.76147	7.542	999.956	1.01593	6.41573	1.92497	0.00454255	0.125719
17143.1	-16.9675	-131.881	3.85941	7.56899	999.966	0.227826	1.69659	0.889449	0.0316496	0.0717857
17143.1	-17.7315	-137.372	4.48035	7.62693	1000.06	0.651646	4.18933	1.32109	0.019206	0.104839
17143.1	-19.1067	-147.26	5.59354	7.6347	1000.13	0.17894	1.12563	0.8341	0.0130749	0.0733542
17143.1	-19.6378	-151.117	5.98607	7.63013	1000.05	0.171823	1.09532	0.816828	0.0105372	0.070403
17143.1	-20.4121	-156.346	6.95116	7.5949	1000.08	0.393558	2.57187	1.01746	0.0284564	0.113439
17143.1	-20.6127	-158.209	6.69274	7.51158	1000.16	0.246672	1.40951	0.981146	0.0255049	0.0829861
17143.1	-19.8821	-153.27	5.78757	7.48647	1000.27	0.181754	1.21597	0.80981	0.0109205	0.0971826
17143.1	-19.5003	-150.322	5.68077	7.46042	1000.45	0.17636	1.13067	0.820811	0.0131283	0.0913899
17143.1	-19.1394	-147.667	5.44762	7.42314	1000.57	0.14085	0.774536	0.848597	0.0262656	0.102891
17143.1	-18.7646	-144.887	5.22973	7.38196	1000.6	0.154632	0.967825	0.817025	0.0121956	0.0845993
17143.1	-18.4016	-142.151	5.06201	7.42358	1000.64	0.0991973	0.63314	0.804464	0.0215216	0.0690643
17143.1	-18.361	-141.518	5.36973	7.4244	1000.68	0.0896492	0.373203	0.846702	0.0159991	0.0790639
17143.1	-18.5493	-142.744	5.65044	7.40575	1000.78	0.191435	1.14091	0.852496	0.00744624	0.0721052
17143.1	-18.9393	-145.519	5.99485	7.43615	1000.79	0.125393	0.705142	0.825661	0.0198246	0.0562752
17143.2	-19.0947	-146.737	6.02016	7.45245	1000.85	0.0870345	0.338131	0.79	0.0229891	0.0686249
17143.2	-19.2501	-147.836	6.1652	7.37173	1000.89	0.146273	0.906621	0.786544	0.0305583	0.0605087
17143.2	-19.6936	-150.998	6.55123	7.31606	1000.98	0.140173	0.843751	0.806936	0.00785404	0.0581779
17143.2	-20.0088	-153.372	6.69857	7.33152	1001.05	0.120298	0.704093	0.804949	0.00628784	0.0680931
17143.2	-20.104	-154.251	6.58118	7.33261	1001.11	0.115576	0.662464	0.822094	0.0123087	0.0638456
17143.2	-20.1021	-154.406	6.41123	7.36182	1001.23	0.0911286	0.433931	0.791892	0.00835837	0.0742196
17143.2	-20.0912	-154.158	6.57169	7.31937	1001.32	0.0919638	0.38175	0.772446	0.0187376	0.0553706
17143.2	-20.2393	-155.103	6.81101	7.35157	1001.39	0.165621	0.985866	0.815346	0.0234402	0.0789018
17143.2	-20.4668	-156.727	7.00813	7.36538	1001.47	0.0917534	0.412763	0.797708	0.0192714	0.0749406
17143.2	-20.5295	-157.239	6.99706	7.36067	1001.69	0.125459	0.645902	0.835161	0.00872036	0.0734152
17143.2	-20.7353	-158.802	7.08004	7.31912	1001.84	0.129561	0.655719	0.821513	0.0171746	0.068248
17143.2	-20.492	-157.35	6.58572	7.29221	1002.01	0.203904	1.25367	0.844052	0.0125395	0.0791154
17143.2	-19.9845	-153.976	5.89953	7.33465	1002	0.160249	1.0317	0.802716	0.016849	0.0494532
17143.2	-19.5653	-150.991	5.53188	7.33745	1002.15	0.133522	0.790781	0.817855	0.0173497	0.0899239
17143.2	-20.1431	-154.645	6.49978	7.22624	1002.13	0.19286	1.26752	0.89706	0.0449726	0.0797948
17143.3	-20.0753	-154.258	6.34404	7.27575	1002.39	0.10727	0.545765	0.791901	0.0226622	0.0933067
17143.3	-20.1656	-155.204	6.12101	7.24219	1002.52	0.107957	0.455386	0.823307	0.0328017	0.0541233
17143.3	-19.9952	-154.317	5.6446	7.18797	1002.66	0.114561	0.521276	0.774863	0.0239979	0.0641008
17143.3	-19.5925	-151.676	5.06384	7.19617	1002.87	0.219862	1.29906	0.858484	0.0174306	0.0786062
17143.3	-19.324	-149.79	4.80147	7.22858	1003.02	0.118783	0.520456	0.839742	0.0195775	0.0632807
17143.3	-19.0814	-148.236	4.41506	7.2574	1003.12	0.108498	0.554621	0.815572	0.0186979	0.0577361
17143.3	-18.8009	-146.533	3.87409	7.2129	1003.3	0.196151	1.19719	0.837397	0.0127164	0.0724902
17143.3	-18.2889	-143.098	3.21332	7.21678	1003.53	0.204296	1.33028	0.796915	0.0167805	0.0799695
17143.3	-17.8838	-140.164	2.90599	7.25423	1003.74	0.163375	0.965259	0.803836	0.00881308	0.0612258
17143.3	-17.7117	-138.613	3.08048	7.26604	1003.96	0.194926	0.934667	1.01387	0.0344902	0.0852964
17143.3	-18.4443	-142.804	4.75046	7.19924	1004.18	0.247145	1.43374	0.93734	0.0149259	0.0718236
17143.3	-19.1375	-147.37	5.72969	7.22062	1004.45	0.118405	0.747945	0.788642	0.00791702	0.079942
17143.3	-19.1989	-148.408	5.18331	7.23321	1004.56	0.105553	0.471299	0.800033	0.00937793	0.0389287
17143.3	-18.3594	-143.489	3.38629	7.29477	1004.75	0.550289	3.40032	1.25673	0.0404429	0.0679875
17143.4	-17.0828	-134.65	2.01282	7.43078	1004.84	0.182154	1.29274	0.796368	0.018678	0.0538103
17143.4	-16.2689	-128.485	1.66604	7.48622	1004.97	0.293125	2.22147	0.765978	0.0127774	0.0417571
17143.4	-15.4651	-122.068	1.65235	7.51791	1005.17	0.254217	1.83922	0.82385	0.011788	0.050389
17143.4	-14.6328	-115.538	1.52452	7.54159	1005.29	0.199968	1.46129	0.774789	0.00968135	0.0543456
17143.4	-14.1243	-111.408	1.58682	7.54936	1005.42	0.1786	1.2296	0.762006	0.0094659	0.0507795
17143.4	-13.5431	-106.425	1.92021	7.53385	1005.5	0.209671	1.88131	0.86554	0.0110421	0.0440979
17143.4	-13.1739	-102.879	2.51268	7.51207	1005.52	0.0952261	0.71115	0.842904	0.0066375	0.0301466
17143.4	-13.0514	-101.596	2.81541	7.4861	1005.58	0.0957467	0.665255	0.770552	0.00885613	0.051475
17143.4	-12.8275	-99.9085	2.71132	7.46476	1005.71	0.109151	0.620523	0.787996	0.0049727	0.0512275
17143.4	-12.5754	-97.7907	2.81217	7.4766	1005.74	0.106448	0.766065	0.785299	0.00960393	0.0465936
17143.4	-12.3931	-96.0657	3.07889	7.49419	1005.73	0.0901593	0.399152	0.802763	0.00811134	0.0399374
17143.4	-12.4651	-96.2223	3.49819	7.45774	1005.9	0.112239	0.559722	0.827729	0.0279128	0.0572674
17143.4	-12.6808	-97.5048	3.9417	7.37311	1006.05	0.0933424	0.476639	0.783902	0.0251862	0.079061
17143.4	-12.6143	-97.2388	3.67552	7.32384	1006.22	0.0916455	0.409981	0.79893	0.0053237	0.0440237
17143.5	-12.5841	-97.1572	3.5158	7.30798	1006.35	0.0963806	0.423679	0.804912	0.0101775	0.059336
17143.5	-12.5417	-96.3801	3.95383	7.30898	1006.52	0.0833244	0.412986	0.761771	0.0111414	0.0597302
17143.5	-12.5506	-96.6313	3.77313	7.25654	1006.69	0.086518	0.392208	0.789396	0.015649	0.0788168
17143.5	-12.5222	-96.697	3.48088	7.27383	1006.77	0.0943148	0.400279	0.801151	0.0131562	0.0320963
17143.5	-12.521	-96.5176	3.65044	7.26664	1006.86	0.0848036	0.38798	0.820002	0.00719108	0.0358233
17143.5	-12.5439	-96.3619	3.98933	7.28363	1006.93	0.0827765	0.34355	0.781801	0.0209064	0.0306817
17143.5	-12.5247	-96.1145	4.08318	7.3098	1007.02	0.0856748	0.365501	0.775107	0.00690558	0.0497855
17143.5	NaN	NaN	NaN	NaN	1007.13	NaN	NaN	NaN	NaN	0.0369783
17143.5	NaN	NaN	NaN	NaN	1007.22	NaN	NaN	NaN	NaN	0.0590211
17143.5	NaN	NaN	NaN	NaN	1007.26	NaN	NaN	NaN	NaN	0.0317154
17143.5	NaN	NaN	NaN	NaN	1007.3	NaN	NaN	NaN	NaN	0.0420397
17143.5	NaN	NaN	NaN	NaN	1007.37	NaN	NaN	NaN	NaN	0.0559588
17143.5	NaN	NaN	NaN	NaN	1007.47	NaN	NaN	NaN	NaN	0.0357688
17143.5	-12.7887	-98.8615	3.44828	7.29357	1007.44	0.0869289	0.38255	0.781148	0.0173806	0.0296079
17143.5	-12.8428	-99.591	3.1512	7.27056	1007.43	0.11339	0.62673	0.835664	0.0114472	0.0466843
17143.6	-13.0168	-100.663	3.47166	7.24891	1007.51	0.0858593	0.343523	0.770079	0.00572154	0.0526372
17143.6	-12.791	-99.4091	2.91859	7.28007	1007.6	0.119872	0.679585	0.81275	0.0104937	0.0432988
17143.6	-12.7085	-98.7945	2.87346	7.27459	1007.64	0.0904948	0.38268	0.801315	0.00503364	0.0291107
17143.6	-12.5666	-97.9111	2.62171	7.24419	1007.69	0.0979508	0.440034	0.818745	0.0113863	0.040908
17143.6	-12.5033	-97.3866	2.63972	7.24577	1007.73	0.0946269	0.531028	0.780225	0.0179835	0.064328
17143.6	-12.541	-97.708	2.6201	7.20191	1007.86	0.0944115	0.441776	0.81851	0.0113711	0.0414026
17143.6	-12.7377	-98.7343	3.16727	7.20536	1008.03	0.145488	0.828079	0.802468	0.0171399	0.0541086
17143.6	-12.6256	-98.18	2.82507	7.22033	1008.11	0.17439	1.0613	0.808008	0.0100807	0.0540687
17143.6	-12.4739	-97.0988	2.69218	7.19724	1008.21	0.0879199	0.396939	0.814498	0.0220338	0.0301381
17143.6	-12.486	-97.3488	2.53952	7.16377	1008.24	0.0838687	0.355937	0.78399	0.00630954	0.0385912
17143.6	-12.7115	-98.3678	3.32418	7.14523	1008.26	0.156301	0.706278	0.894414	0.0148991	0.0371749
17143.6	-13.3932	-102.247	4.89898	6.92782	1008.3	0.143018	1.10754	0.779007	0.0706215	0.0324907
17143.6	-13.49	-103.337	4.58318	6.86212	1008.41	0.110464	0.510925	0.83711	0.0209766	0.0609522
17143.6	-13.5742	-104.048	4.54564	6.86916	1008.43	0.101693	0.489158	0.801564	0.0177911	0.0600056
17143.7	-13.5432	-103.796	4.55008	6.89755	1008.33	0.15217	0.789389	0.846614	0.0145583	0.0293112
17143.7	-13.1117	-101.336	3.55731	6.95141	1008.28	0.103929	0.564167	0.810164	0.022151	0.0535552
17143.7	-12.8755	-99.7472	3.25699	6.98655	1008.36	0.0874684	0.377394	0.768359	0.00577967	0.0374089
17143.7	-12.8063	-99.1173	3.33325	6.99943	1008.5	0.0886366	0.377318	0.820136	0.00617356	0.0645128
17143.7	-12.8657	-99.4517	3.47362	7.00795	1008.52	0.0955593	0.406541	0.799507	0.00728157	0.0410476
17143.7	-12.8174	-98.8971	3.64246	7.00311	1008.51	0.0867964	0.362191	0.791028	0.0152726	0.0430043
17143.7	-12.8378	-99.1035	3.59866	6.96184	1008.49	0.0869755	0.413714	0.844009	0.012692	0.0437151
17143.7	-12.8741	-99.2933	3.69984	6.94239	1008.58	0.0884537	0.47055	0.803536	0.0175297	0.0455618
17143.7	-12.8999	-99.3235	3.8756	6.90279	1008.66	0.0875775	0.426555	0.763592	0.0140136	0.0496649
17143.7	-12.9189	-99.578	3.77279	6.85451	1008.61	0.0857864	0.421488	0.786959	0.0117247	0.0302392
17143.7	-12.929	-99.6596	3.77258	6.83924	1008.69	0.0817853	0.34886	0.769399	0.00926364	0.0401983
17143.7	-12.9111	-99.6848	3.60434	6.82446	1008.73	0.0900886	0.427508	0.779056	0.0100732	0.0421957
17143.7	-12.8558	-99.4018	3.44454	6.84394	1008.76	0.0877616	0.509994	0.800486	0.0164381	0.0473246
17143.7	-12.8585	-99.3389	3.52899	6.86356	1008.72	0.0953692	0.544878	0.800236	0.0148648	0.0430634
17143.8	-12.8424	-99.2257	3.51329	6.83403	1008.77	0.0854864	0.367904	0.773006	0.00996343	0.0702958
17143.8	-12.8347	-99.0942	3.58356	6.84023	1008.61	0.0823537	0.346105	0.759869	0.00874428	0.0294437
17143.8	-12.9494	-99.3992	4.19593	6.79285	1008.46	0.104482	0.452871	0.831084	0.0343786	0.0452407
17143.8	-12.9652	-99.8514	3.87003	6.75484	1008.42	0.0888051	0.345014	0.807348	0.0115478	0.0545431
17143.8	-12.9108	-99.6598	3.62658	6.78836	1008.37	0.0879321	0.403922	0.848709	0.0162064	0.0500045
17143.8	-12.81	-99.0944	3.38585	6.84477	1008.53	0.087783	0.406233	0.775816	0.0135902	0.046123
17143.8	-12.7401	-98.3254	3.59543	6.87759	1008.52	0.0877573	0.460736	0.833212	0.0149826	0.034715
17143.8	-12.6841	-98.3616	3.11085	6.87506	1008.52	0.0870003	0.340389	0.790553	0.00882057	0.0268217
17143.8	-12.5683	-97.441	3.1057	6.89771	1008.5	0.0936389	0.54982	0.825348	0.00943715	0.0466669
17143.8	-12.5012	-96.9033	3.10643	6.90047	1008.44	0.101382	0.596754	0.797028	0.00443576	0.0492666
17143.8	-12.5208	-96.6727	3.49333	6.87071	1008.58	0.0880946	0.475864	0.770773	0.0166339	0.0311799
17143.8	-12.5234	-96.9228	3.26448	6.83494	1008.72	0.0916321	0.456741	0.80015	0.00448831	0.0666365
17143.8	-12.5255	-97.1494	3.05465	6.80145	1008.67	0.0923741	0.522827	0.832577	0.00983689	0.0566409
17143.8	-12.5203	-97.3031	2.8596	6.80729	1008.66	0.0875656	0.369412	0.811414	0.00386536	0.0588851
17143.8	-12.4865	-96.9577	2.93422	6.81804	1008.73	0.0864782	0.461583	0.779481	0.00455522	0.0297058
17143.9	-12.4558	-96.717	2.92959	6.79819	1008.61	0.0902755	0.381255	0.829408	0.0135039	0.0346173
17143.9	-12.4314	-96.5764	2.87507	6.74254	1008.66	0.088851	0.385113	0.823182	0.0227744	0.047989
17143.9	-12.5149	-97.1265	2.99308	6.68296	1008.77	0.0853387	0.369749	0.773335	0.0124949	0.0286912
17143.9	-12.8452	-99.2088	3.55266	6.67818	1008.76	0.145006	0.97351	0.789744	0.0277862	0.0464068
17143.9	-12.8412	-98.908	3.82127	6.75556	1008.67	0.0890268	0.434531	0.791291	0.00680134	0.0264966
17143.9	-12.7605	-98.376	3.70809	6.76206	1008.71	0.0947955	0.425262	0.826757	0.0140893	0.0317207
17143.9	-12.8096	-98.7221	3.75483	6.78748	1008.66	0.0940364	0.435067	0.82218	0.0117767	0.0570554
17143.9	-12.6205	-97.5828	3.38102	6.80035	1008.79	0.0939472	0.426935	0.787891	0.00421994	0.0493617
17143.9	-12.6619	-97.7652	3.53009	6.79846	1008.9	0.0822213	0.396215	0.762651	0.00546548	0.0297464
17143.9	-12.6843	-98.0754	3.39859	6.80714	1008.85	0.0858717	0.331382	0.776203	0.0103373	0.0342665
17143.9	-12.5949	-97.6309	3.12817	6.82784	1008.79	0.090767	0.342076	0.816524	0.00492164	0.0563496
17143.9	-12.5739	-97.4596	3.13181	6.83657	1008.78	0.0892188	0.371468	0.785298	0.00544246	0.0444699
17143.9	-12.6804	-97.7982	3.64483	6.82773	1008.69	0.195578	0.898868	0.988179	0.0271223	0.118341
17143.9	-12.9959	-99.9316	4.0359	6.73763	1008.69	0.119343	0.428425	0.938062	0.0188772	0.0937375
17144	-13.3646	-101.838	5.07867	6.61655	1008.83	0.110207	0.785827	0.888622	0.0429581	0.0415569
17144	-13.4532	-102.999	4.6264	6.60677	1008.64	0.0922439	0.391282	0.833391	0.0117465	0.0571025
17144	-13.5391	-103.685	4.62769	6.62322	1008.66	0.0949489	0.4184	0.812894	0.018853	0.0391301
17144	-13.3179	-102.65	3.89296	6.71523	1008.62	0.126928	0.828878	0.762656	0.0329996	0.0609271
17144	-13.2627	-102.273	3.82885	6.74319	1008.52	0.0904821	0.383292	0.81937	0.0114765	0.0323382
17144	-13.1858	-101.843	3.64271	6.75933	1008.52	0.0939067	0.384681	0.794363	0.005622	0.0315201
17144	-13.1211	-101.388	3.58027	6.75249	1008.53	0.0902718	0.387235	0.800427	0.0131346	0.043199
17144	-13.1785	-101.85	3.57828	6.72384	1008.64	0.0849838	0.347399	0.769737	0.00633383	0.0359878
17144	-13.1882	-101.837	3.66932	6.71296	1008.53	0.0864314	0.383895	0.776017	0.00958844	0.0754937
17144	-13.237	-102.188	3.70785	6.68944	1008.45	0.0956241	0.448105	0.828413	0.0129975	0.0386698
17144	-13.219	-102.107	3.64506	6.7006	1008.46	0.0933864	0.468569	0.811761	0.0122048	0.0444232
17144	-13.1778	-101.731	3.69134	6.65281	1008.39	0.102927	0.415502	0.924332	0.0159467	0.0319344
17144	NaN	NaN	NaN	NaN	1008.26	NaN	NaN	NaN	NaN	0.0749152
17144	NaN	NaN	NaN	NaN	1008.29	NaN	NaN	NaN	NaN	0.0658377
17144	NaN	NaN	NaN	NaN	1008.11	NaN	NaN	NaN	NaN	0.0422902
17144.1	NaN	NaN	NaN	NaN	1007.99	NaN	NaN	NaN	NaN	0.0752357
17144.1	NaN	NaN	NaN	NaN	1007.91	NaN	NaN	NaN	NaN	0.0642401
17144.1	NaN	NaN	NaN	NaN	1007.88	NaN	NaN	NaN	NaN	0.0467341
17144.1	-14.2403	-108.465	5.45734	6.68477	1007.95	0.135045	0.725509	0.868442	0.0212114	0.0481872
17144.1	-14.508	-110.41	5.65368	6.64417	1007.93	0.170007	0.870059	0.930079	0.0155132	0.0453892
17144.1	NaN	NaN	NaN	NaN	NaN	NaN	NaN	NaN	NaN	NaN
17144.1	NaN	NaN	NaN	NaN	NaN	NaN	NaN	NaN	NaN	NaN
17144.1	NaN	NaN	NaN	NaN	NaN	NaN	NaN	NaN	NaN	NaN
17144.1	-14.6047	-110.526	6.31154	6.3804	1008.12	0.217326	1.35199	0.953623	0.039822	0.116271
17144.1	-14.8756	-112.793	6.2113	6.21117	1008.08	0.103028	0.511847	0.829993	0.0467494	0.0461234
17144.1	-14.906	-113.104	6.14393	6.22688	1008.1	0.133395	0.643748	0.861583	0.0195919	0.0815053
17144.1	-15.0092	-113.616	6.45765	6.15966	1008.06	0.142713	1.03494	0.958811	0.121389	0.0435003
17144.1	-14.9712	-113.814	5.95585	6.07166	1008.02	0.123185	0.502099	0.878259	0.0795223	0.0397879
17144.1	-14.6658	-111.902	5.42428	6.26996	1007.85	0.164237	0.933335	0.824217	0.044909	0.0602061
17144.2	-14.4051	-109.946	5.29443	6.3447	1007.84	0.0888149	0.382089	0.796803	0.0150171	0.0412324
17144.2	-14.1583	-108.499	4.76771	6.43465	1008	0.157764	0.89013	0.831722	0.0293311	0.127859
17144.2	-13.7923	-106.127	4.21156	6.50346	1007.99	0.135242	0.830996	0.812002	0.0141938	0.0637515
17144.2	-13.6295	-104.778	4.25857	6.47196	1007.94	0.103449	0.474137	0.812094	0.0191473	0.0671251
17144.2	-13.4595	-103.634	4.04177	6.45496	1007.9	0.0960429	0.583587	0.830468	0.036548	0.0610659
17144.2	-13.3816	-103.163	3.89032	6.46618	1007.86	0.141014	0.946482	0.901771	0.0327473	0.0347721
17144.2	-13.5447	-103.76	4.59783	6.41556	1007.84	0.138273	0.715651	0.937462	0.0360793	0.0443225
17144.2	-13.3082	-102.431	4.03463	6.47839	1007.87	0.122863	0.662092	0.799994	0.0395087	0.0314394
17144.2	-13.3455	-102.803	3.96105	6.29274	1007.9	0.126742	0.728265	0.827987	0.0654806	0.0323541
17144.2	-13.3786	-103.215	3.81385	6.2271	1008	0.0937662	0.43305	0.80297	0.0203689	0.0403092
17144.2	-13.4377	-103.706	3.79614	6.19073	1008.09	0.100401	0.477176	0.834818	0.0184808	0.0295928
17144.2	-13.5709	-104.64	3.92711	6.12547	1008.03	0.100664	0.545268	0.79565	0.0359606	0.0357449
17144.2	-13.4719	-104.205	3.57052	6.18544	1008.02	0.101395	0.539519	0.795737	0.0357954	0.0268034
17144.2	-13.3869	-103.633	3.46196	6.2575	1008.18	0.0907647	0.394746	0.817661	0.0231973	0.0717277
17144.2	-13.4086	-103.625	3.64381	6.29392	1008.17	0.0863514	0.373934	0.793545	0.0177376	0.0410575
17144.3	-13.1791	-102.076	3.35723	6.40813	1008.26	0.100304	0.580456	0.791654	0.0249706	0.0557109
17144.3	-13.2039	-101.929	3.70236	6.4774	1008.26	0.125178	0.785011	0.798856	0.0285676	0.0439566
17144.3	-13.1078	-101.016	3.84666	6.47069	1008.35	0.109172	0.575301	0.811441	0.0363427	0.0636587
17144.3	-13.1982	-101.823	3.76188	6.39134	1008.39	0.096931	0.408055	0.828939	0.0211742	0.0411417
17144.3	-13.128	-101.453	3.57089	6.38806	1008.53	0.0866663	0.396372	0.762046	0.0173748	0.0450428
17144.3	-13.0604	-101.096	3.38711	6.39405	1008.5	0.0980579	0.45013	0.777979	0.0141845	0.0721244
17144.3	-13.1022	-101.215	3.60202	6.34998	1008.41	0.102923	0.583755	0.789498	0.0288156	0.0269985
17144.3	-13.2075	-101.905	3.75529	6.2968	1008.53	0.109238	0.484186	0.832564	0.0306072	0.0521469
17144.3	-13.2543	-102.179	3.85525	6.29562	1008.71	0.111847	0.630655	0.802357	0.029922	0.047312
17144.3	-13.0401	-100.782	3.53884	6.37263	1008.79	0.102743	0.48428	0.804069	0.0250504	0.0317841
17144.3	-13.0863	-100.856	3.83467	6.36189	1008.78	0.0930715	0.45712	0.772242	0.0143576	0.033081
17144.3	-13.2092	-101.599	4.07409	6.33523	1008.76	0.152831	0.705603	0.898681	0.0333609	0.030864
17144.3	-13.6794	-104.901	4.5344	6.25311	1008.9	0.0974781	0.602634	0.825061	0.0285864	0.0611208
17144.3	-14.0547	-107.496	4.94131	6.32749	1008.91	0.306199	1.61332	1.11651	0.0141114	0.0618211
17144.4	-14.6711	-111.767	5.60159	6.26229	1008.85	0.117753	0.411306	1.00588	0.0144051	0.0390372
17144.4	-14.5104	-110.543	5.54073	6.32863	1009.05	0.195209	1.24359	0.878863	0.0203239	0.100325
17144.4	-13.6248	-104.563	4.43551	6.3889	1009.26	0.285107	1.83768	0.920302	0.0315966	0.0789815
17144.4	NaN	NaN	NaN	NaN	1009.37	NaN	NaN	NaN	NaN	0.0294257
17144.4	NaN	NaN	NaN	NaN	1009.46	NaN	NaN	NaN	NaN	0.0367713
17144.4	NaN	NaN	NaN	NaN	1009.53	NaN	NaN	NaN	NaN	0.0278004
17144.4	NaN	NaN	NaN	NaN	1009.59	NaN	NaN	NaN	NaN	0.0234645
17144.4	NaN	NaN	NaN	NaN	1009.56	NaN	NaN	NaN	NaN	0.0364514
17144.4	NaN	NaN	NaN	NaN	1009.67	NaN	NaN	NaN	NaN	0.0727037
17144.4	-13.0274	-100.261	3.95795	6.5083	1009.75	0.0994186	0.450188	0.848797	0.00841718	0.0386594
17144.4	-13.006	-100.434	3.61464	6.5034	1009.66	0.0878008	0.387333	0.790934	0.00667151	0.0376566
17144.4	-12.9734	-100.494	3.29295	6.49557	1009.56	0.0902581	0.37083	0.837586	0.00526423	0.0578727
17144.4	-12.9258	-100.629	2.77732	6.53115	1009.42	0.0932023	0.410417	0.763889	0.0171976	0.0423413
17144.4	-12.8078	-99.7374	2.72535	6.56569	1009.26	0.0840319	0.348924	0.765933	0.00499706	0.107228
17144.5	-12.8486	-99.8715	2.91733	6.56242	1009.06	0.0856761	0.450284	0.782668	0.00356231	0.0632572
17144.5	-12.8348	-99.8234	2.8548	6.58359	1009.11	0.0912456	0.393251	0.839103	0.00770814	0.0831737
17144.5	-12.8576	-99.53	3.33071	6.56037	1009.26	0.0862172	0.376486	0.790042	0.0196407	0.0349627
17144.5	-13.0177	-100.778	3.36401	6.4552	1009.19	0.093969	0.561989	0.812252	0.0251952	0.0343769
17144.5	-13.0181	-101.107	3.03843	6.46402	1009.14	0.0918558	0.3522	0.841966	0.0254376	0.0474248
17144.5	-12.9686	-100.849	2.89959	6.52802	1009.04	0.0822258	0.352543	0.765292	0.0088296	0.0359333
17144.5	-12.9151	-100.545	2.77611	6.55057	1009.02	0.0900418	0.373285	0.79002	0.00804466	0.0751355
17144.5	-12.9171	-100.63	2.70616	6.55689	1008.82	0.0861871	0.478387	0.80888	0.00742062	0.0926621
17144.5	-12.9386	-100.766	2.74324	6.54682	1008.89	0.0863192	0.40528	0.778176	0.00833659	0.0775065
17144.5	-12.9392	-100.367	3.14713	6.52589	1008.97	0.105974	0.49954	0.807968	0.0408507	0.044781
17144.5	-13.1079	-101.435	3.42886	6.42881	1008.92	0.0853079	0.354875	0.772304	0.00618116	0.0457678
17144.5	-13.1241	-101.788	3.20488	6.44538	1008.81	0.0844739	0.333411	0.755975	0.00818868	0.0622952
17144.5	-13.1321	-101.881	3.1754	6.46013	1008.7	0.0887678	0.340608	0.804146	0.00768039	0.0247544
17144.5	-13.0383	-101.206	3.1001	6.49577	1008.58	0.102962	0.645282	0.782336	0.0126145	0.0734977
17144.5	-13.0538	-101.017	3.41318	6.45587	1008.49	0.0927497	0.393355	0.854643	0.0119411	0.057198
17144.6	-13.0692	-100.768	3.78578	6.41769	1008.43	0.0852342	0.376421	0.782523	0.0242778	0.0299125
17144.6	-13.0905	-100.961	3.76246	6.43326	1008.45	0.0894593	0.405032	0.796911	0.0416599	0.0281357
17144.6	-12.9573	-100.085	3.57378	6.53121	1008.32	0.095609	0.377438	0.847081	0.0143912	0.0692367
17144.6	-12.8851	-99.6141	3.46651	6.56736	1008.22	0.0887261	0.356424	0.796181	0.0107206	0.0276334
17144.6	-12.7936	-98.8198	3.52881	6.60074	1008.11	0.0924476	0.512748	0.810758	0.00857105	0.0377606
17144.6	-12.7311	-98.1786	3.67008	6.61679	1008.15	0.0919148	0.319552	0.829144	0.00605753	0.0478741
17144.6	-12.752	-98.2836	3.73263	6.58848	1008.02	0.0928631	0.377008	0.812044	0.0117437	0.0986153
17144.6	-12.8298	-98.4796	4.15852	6.54552	1007.81	0.0851613	0.348324	0.810041	0.0125702	0.0486341
17144.6	-12.896	-98.9294	4.23861	6.51873	1007.84	0.0896035	0.374023	0.829289	0.00614209	0.0483007
17144.6	-12.8934	-98.6365	4.51034	6.53327	1007.98	0.0902474	0.367171	0.838851	0.00434118	0.0310159
17144.6	-12.8942	-98.2989	4.85472	6.53871	1007.72	0.0883501	0.337893	0.835166	0.00312385	0.116144
17144.6	-12.8923	-97.865	5.27298	6.5497	1007.59	0.0864975	0.400413	0.802331	0.0069056	0.0554294
17144.6	-12.8606	-97.308	5.57716	6.55921	1007.52	0.0883244	0.365216	0.81127	0.00960481	0.0331511
17144.6	-12.8699	-97.0677	5.89146	6.56292	1007.34	0.0827146	0.355149	0.769145	0.00801802	0.0499605
17144.7	-12.905	-97.278	5.96202	6.55088	1007.14	0.0827425	0.350912	0.73526	0.00840637	0.0504149
17144.7	-12.9919	-97.9571	5.97807	6.51574	1006.96	0.0882355	0.397288	0.794446	0.010565	0.0512198
17144.7	-12.9855	-98.0666	5.81718	6.52509	1006.71	0.0826668	0.342128	0.759637	0.0101102	0.143461
17144.7	-12.9639	-98.0116	5.6997	6.53358	1006.45	0.0923841	0.407185	0.813604	0.0126499	0.0522745
17144.7	-13.0404	-98.5918	5.73144	6.50146	1006.39	0.0929133	0.371244	0.837892	0.00967149	0.0830794
17144.7	-13.1328	-99.3644	5.69801	6.46118	1006.19	0.0921063	0.385119	0.819632	0.0146104	0.0296998
17144.7	-13.229	-100.062	5.77008	6.42338	1006.07	0.0903231	0.386353	0.772126	0.00750633	0.0761956
17144.7	-13.3604	-100.653	6.23036	6.37729	1005.83	0.100845	0.53643	0.806281	0.0273642	0.0301791
17144.7	-13.4676	-101.444	6.29691	6.33682	1005.75	0.0962933	0.429944	0.850745	0.00861231	0.0582756
17144.7	-13.55	-101.8	6.59967	6.31491	1005.63	0.0981452	0.384097	0.800992	0.0166121	0.0376569
17144.7	-13.637	-102.478	6.61803	6.28424	1005.56	0.0892748	0.329543	0.814193	0.00504831	0.0471092
17144.7	-13.6646	-102.602	6.71475	6.27982	1005.39	0.0874686	0.348469	0.796488	0.00648442	0.0378454
17144.7	-13.784	-103.203	7.06882	6.23813	1005.41	0.0906739	0.389313	0.814997	0.00865017	0.0399915
17144.7	-13.835	-103.522	7.15839	6.21994	1005.43	0.0860722	0.358633	0.776966	0.00794962	0.0348974
17144.8	-13.7758	-103.243	6.96309	6.24944	1005.47	0.0862532	0.332843	0.801996	0.0118668	0.0290212
17144.8	-13.7814	-103.155	7.09624	6.27992	1005.43	0.0879979	0.349533	0.802525	0.0081982	0.0352081
17144.8	-13.9259	-103.939	7.46759	6.3219	1005.45	0.117985	0.569866	0.829143	0.013559	0.0325145
17144.8	-13.9909	-104.65	7.27722	6.37494	1005.31	0.0908814	0.341925	0.829147	0.0176148	0.0580815
17144.8	-13.9653	-104.496	7.22665	6.41774	1005.19	0.0920791	0.375427	0.811701	0.0113067	0.0323562
17144.8	-13.9458	-104.381	7.18564	6.44131	1005.2	0.0867376	0.321174	0.797202	0.00855265	0.0355553
17144.8	-14.0132	-104.832	7.27347	6.44344	1005.08	0.0890986	0.408112	0.787265	0.00592801	0.0661607
17144.8	-14.2383	-106.521	7.38548	6.43658	1004.91	0.139907	0.873831	0.814415	0.00628667	0.0769075
17144.8	-14.8533	-110.794	8.03176	6.43574	1004.58	0.246274	1.63338	0.836511	0.00710675	0.0551963
17144.8	-15.291	-114.342	7.98585	6.4505	1004.63	0.106824	0.48384	0.842736	0.00566753	0.0554001
17144.8	-15.3524	-115.05	7.76935	6.46687	1004.69	0.104672	0.625904	0.765575	0.00454836	0.0419409
17144.8	-15.5607	-116.703	7.78242	6.47377	1004.62	0.108451	0.591	0.79702	0.00661176	0.0300049
17144.8	-15.9017	-119.126	8.08787	6.44803	1004.65	0.141219	0.955573	0.794103	0.0148114	0.0482878
17144.8	-16.3242	-122.355	8.23871	6.40107	1004.67	0.185259	1.31806	0.797151	0.0149715	0.0360294
17144.8	-16.6974	-125.301	8.2787	6.35331	1004.54	0.0954235	0.574128	0.78104	0.00951942	0.0723468
17144.9	-16.9183	-127.238	8.10791	6.33229	1004.4	0.110449	0.587609	0.781956	0.0092334	0.0356251
17144.9	-17.0253	-128.059	8.14354	6.34964	1004.23	0.12061	0.632176	0.809323	0.00673277	0.0402641
17144.9	-17.0798	-128.34	8.29816	6.31139	1004.36	0.0990252	0.39467	0.826394	0.0147109	0.0438079
17144.9	-17.4887	-131.228	8.6819	6.22238	1004.28	0.144673	0.931432	0.798396	0.025727	0.0458129
17144.9	-17.2504	-129.815	8.18799	6.27031	1004.19	0.124322	0.647955	0.811611	0.019114	0.0424838
17144.9	-17.8727	-134.28	8.70167	6.26583	1004.22	0.231306	1.78333	0.799851	0.012619	0.0308273
17144.9	-18.0971	-136.192	8.58437	6.2923	1004.3	0.0925702	0.42128	0.78378	0.0099503	0.0346098
17144.9	-18.2244	-137.09	8.70514	6.30635	1004.31	0.116423	0.636303	0.808715	0.00535467	0.0250316
17144.9	NaN	NaN	NaN	NaN	1004.28	NaN	NaN	NaN	NaN	0.0282446
17144.9	NaN	NaN	NaN	NaN	1004.31	NaN	NaN	NaN	NaN	0.0432457
17144.9	NaN	NaN	NaN	NaN	1004.26	NaN	NaN	NaN	NaN	0.0310648
17144.9	NaN	NaN	NaN	NaN	1004.24	NaN	NaN	NaN	NaN	0.0489212
17144.9	NaN	NaN	NaN	NaN	1004.32	NaN	NaN	NaN	NaN	0.0552381
17144.9	NaN	NaN	NaN	NaN	1004.39	NaN	NaN	NaN	NaN	0.0279514
17145	-18.1185	-136.328	8.6208	6.48516	1004.41	0.0891497	0.341549	0.826355	0.00476633	0.0314992
17145	-18.1054	-136.382	8.46083	6.49925	1004.39	0.08431	0.348676	0.753402	0.00803982	0.0223384
17145	-18.0984	-136.386	8.40124	6.51663	1004.26	0.0806791	0.328567	0.74913	0.008374	0.0672662
17145	-18.0396	-135.941	8.37591	6.53074	1004.2	0.0896476	0.390258	0.774283	0.00809646	0.0335668
17145	-17.9513	-135.312	8.29892	6.5549	1004.06	0.0848768	0.364104	0.760832	0.00829472	0.0735351
17145	-17.8821	-135	8.05647	6.55165	1003.96	0.0840895	0.338743	0.772239	0.00898138	0.0421954
17145	-17.8706	-135.06	7.9051	6.50666	1003.81	0.0859543	0.337331	0.80192	0.0166304	0.0590893
17145	-17.737	-134.602	7.29334	6.48098	1003.76	0.0916114	0.335034	0.851422	0.00632119	0.0287216
17145	-17.6679	-134.406	6.93642	6.46924	1003.79	0.0964263	0.351476	0.818465	0.00566166	0.0540533
17145	-17.4981	-133.569	6.41551	6.4778	1003.81	0.0887121	0.351886	0.767012	0.00524061	0.0337142
17145	-17.4772	-133.306	6.51195	6.46054	1003.79	0.0807718	0.340794	0.756896	0.00456356	0.0446949
17145	-17.4757	-133.214	6.59178	6.46298	1003.82	0.0873722	0.326703	0.786516	0.00286143	0.0346433
17145	-17.4186	-132.793	6.55626	6.47597	1003.74	0.0830413	0.350025	0.768141	0.00879841	0.0361525
17145	-17.3709	-132.333	6.63403	6.49382	1003.79	0.0876312	0.357283	0.813984	0.00450427	0.0374006
17145	-17.3855	-132.42	6.66401	6.50476	1003.67	0.081032	0.335034	0.769889	0.00528367	0.043357
17145.1	-17.3863	-132.476	6.61462	6.48889	1003.64	0.0852175	0.347953	0.80584	0.00345505	0.0272096
17145.1	-17.3375	-132.244	6.45644	6.497	1003.64	0.0858393	0.328958	0.787006	0.00484942	0.0306712
17145.1	-17.2986	-131.981	6.40785	6.51157	1003.54	0.0832627	0.340169	0.777703	0.00510551	0.0624831
17145.1	-17.2529	-131.684	6.33886	6.52173	1003.34	0.085616	0.353072	0.790771	0.0052087	0.0531345
17145.1	-17.2071	-131.383	6.27342	6.54225	1003.23	0.0886096	0.373911	0.802383	0.00829413	0.0315629
17145.1	-17.1336	-130.855	6.21428	6.56907	1003.1	0.0884523	0.383294	0.803953	0.0101539	0.0599545
17145.1	-17.038	-130.154	6.14985	6.60691	1002.97	0.102104	0.461138	0.793101	0.0175504	0.0645331
17145.1	-17.0534	-130.04	6.38667	6.60723	1002.95	0.105572	0.43014	0.797209	0.0130613	0.0887645
17145.1	-17.153	-130.461	6.76259	6.5856	1002.88	0.0824578	0.321544	0.760201	0.00521411	0.0430452
17145.1	-17.1677	-130.524	6.81801	6.57714	1002.72	0.084384	0.328755	0.776424	0.00746844	0.0599563
17145.1	-17.1141	-130.094	6.81868	6.58418	1002.62	0.0870957	0.348525	0.788924	0.00758607	0.0300481
17145.1	-17.1096	-129.923	6.95387	6.58652	1002.51	0.0844349	0.319003	0.797854	0.00455855	0.0466478
17145.1	-17.0546	-129.47	6.96744	6.59965	1002.39	0.090217	0.415866	0.793122	0.00901563	0.0310335
17145.1	-16.8968	-128.488	6.68596	6.62625	1002.3	0.091658	0.440432	0.767422	0.00650896	0.0435043
17145.2	-16.8806	-128.329	6.715	6.61999	1002.26	0.0871646	0.382639	0.775137	0.0123796	0.0301568
17145.2	-17.0421	-129.349	6.98779	6.56856	1002.21	0.102654	0.471149	0.794104	0.00947643	0.038416
17145.2	-17.2426	-130.839	7.10241	6.54862	1002.08	0.0930335	0.46058	0.769243	0.00725328	0.0412678
17145.2	-17.2387	-130.89	7.02025	6.59173	1001.98	0.0945209	0.34984	0.807884	0.0213631	0.0401427
17145.2	-16.9494	-129.428	6.16744	6.70058	1001.87	0.151745	0.696422	0.897789	0.0317615	0.0366555
17145.2	-16.8547	-128.722	6.11624	6.74112	1001.8	0.0863033	0.33988	0.7773	0.0120667	0.0525316
17145.2	-16.785	-128.215	6.06506	6.74027	1001.71	0.0885728	0.384208	0.7735	0.0176284	0.0319649
17145.2	-16.7587	-128.117	5.95279	6.73025	1001.83	0.101778	0.456067	0.781898	0.0134228	0.0868868
17145.2	-16.7214	-127.438	6.33272	6.75147	1002.04	0.133458	0.491065	0.91595	0.0111652	0.0268435
17145.2	-17.0691	-129.31	7.24256	6.71233	1001.86	0.126612	0.716733	0.839575	0.0265935	0.147552
17145.2	-17.1764	-130.656	6.75569	6.62421	1001.8	0.0906004	0.360163	0.81584	0.0130476	0.0956293
17145.2	-16.9097	-129.131	6.14657	6.65506	1001.82	0.14509	0.889066	0.720914	0.0175135	0.0606782
17145.2	-16.7153	-127.937	5.78589	6.6415	1001.85	0.103195	0.575612	0.786876	0.0137325	0.0305534
17145.2	-16.4441	-126.314	5.23954	6.6385	1001.97	0.11742	0.556289	0.822667	0.00503878	0.0584203
17145.2	-16.3669	-125.847	5.08815	6.63624	1002.08	0.0936465	0.381389	0.796118	0.00492184	0.0631994
17145.3	-16.202	-124.869	4.74733	6.66039	1002.11	0.134377	0.707368	0.781299	0.0139104	0.0326716
17145.3	-15.9601	-123.173	4.5082	6.69165	1002.14	0.0881744	0.381219	0.787019	0.00794326	0.035698
17145.3	-15.869	-122.479	4.47305	6.72317	1002.13	0.100891	0.545076	0.78247	0.0142926	0.0331314
17145.3	-15.6698	-120.971	4.38785	6.74466	1002.14	0.141034	0.972302	0.832326	0.0171309	0.0332004
17145.3	-15.7276	-121.505	4.31537	6.73777	1002.15	0.133577	0.753861	0.804849	0.0117772	0.038013
17145.3	-15.5846	-120.52	4.15598	6.71783	1002.14	0.10001	0.507313	0.785472	0.0190321	0.0285798
17145.3	-15.4417	-119.437	4.0963	6.70174	1002.13	0.104097	0.5467	0.784532	0.0258977	0.0458938
17145.3	-15.4496	-119.431	4.16592	6.71558	1002.03	0.154029	1.15692	0.807245	0.027145	0.064727
17145.3	-15.4385	-119.267	4.2412	6.66499	1002.14	0.113862	0.709154	0.817379	0.0406847	0.050738
17145.3	-15.7298	-121.798	4.04115	6.42181	1002.35	0.210635	1.85176	0.890917	0.143098	0.0522135
17145.3	-15.9892	-124.541	3.37281	6.24829	1002.51	0.104686	0.494873	0.853657	0.0225415	0.0561597
17145.3	-15.8469	-123.158	3.61701	6.40322	1002.63	0.117194	0.786269	0.791795	0.068796	0.0403877
17145.3	-15.5665	-120.863	3.66817	6.50298	1002.65	0.117176	0.640078	0.807297	0.0538201	0.0486229
17145.3	-15.7504	-122.199	3.804	6.35878	1002.8	0.0919124	0.458412	0.765111	0.0166889	0.0318313
17145.4	-15.75	-121.765	4.2345	6.39242	1002.88	0.0918222	0.434976	0.874803	0.00930278	0.0262663
17145.4	-15.7895	-120.802	5.51396	6.4504	1003	0.084872	0.383792	0.800139	0.0226571	0.0939479
17145.4	-15.8076	-120.994	5.46718	6.48122	1003.46	0.0975924	0.443222	0.875378	0.0253073	0.120944
17145.4	-15.7685	-119.053	7.09537	6.57747	1003.39	0.128591	1.02438	0.880363	0.0246844	0.0412766
17145.4	-15.6121	-118.051	6.84531	6.58034	1003.43	0.108337	0.697852	0.851619	0.0320374	0.0280701
17145.4	-15.6984	-118.335	7.25246	6.60893	1003.5	0.0922112	0.456948	0.879533	0.0200272	0.0578048
17145.4	-15.6121	-116.896	8.00096	6.61647	1003.58	0.0904969	0.380153	0.777031	0.0154065	0.0425277
17145.4	-15.522	-115.726	8.45	6.62964	1003.58	0.0908639	0.532943	0.865953	0.0103387	0.0342353
17145.4	-15.4942	-115.727	8.22648	6.60856	1003.61	0.110364	0.69443	0.81542	0.0421222	0.0359204
17145.4	-15.7777	-118.619	7.60244	6.44493	1003.76	0.102346	0.707527	0.812273	0.0299697	0.0411757
17145.4	-15.7995	-119.102	7.294	6.45395	1003.79	0.0918579	0.373965	0.837103	0.013021	0.0312268
17145.4	-15.8088	-119	7.47008	6.4737	1003.86	0.0874153	0.340738	0.763261	0.00516405	0.0492499
17145.4	-15.7158	-117.938	7.78816	6.50542	1003.92	0.111391	0.827384	0.816603	0.0115998	0.0277669
17145.4	-15.6334	-117.291	7.77633	6.51622	1003.95	0.11112	0.3565	0.883813	0.00263356	0.0334576
17145.5	NaN	NaN	NaN	NaN	1004.02	NaN	NaN	NaN	NaN	0.0382366
17145.5	NaN	NaN	NaN	NaN	1004.06	NaN	NaN	NaN	NaN	0.0274268
17145.5	NaN	NaN	NaN	NaN	1004.12	NaN	NaN	NaN	NaN	0.0394457
17145.5	NaN	NaN	NaN	NaN	1004.23	NaN	NaN	NaN	NaN	0.0230198
17145.5	NaN	NaN	NaN	NaN	1004.24	NaN	NaN	NaN	NaN	0.0273393
17145.5	-14.8669	-112.124	6.81085	6.61815	1004.3	0.0789891	0.347048	0.752656	0.00390899	0.0411063
17145.5	-13.8705	-105.742	5.22215	6.62172	1004.31	0.522853	3.42318	1.19326	0.0122344	0.0309762
17145.5	-13.7098	-104.643	5.03586	6.62797	1004.3	0.246651	1.48343	0.980473	0.00915199	0.0239391
17145.5	-13.4689	-103.091	4.66001	6.62899	1004.3	0.210471	1.38856	0.82814	0.0123887	0.0363157
17145.5	-13.1239	-100.473	4.51772	6.55391	1004.37	0.127964	0.826045	0.809968	0.0228267	0.0267378
17145.5	-13.1298	-100.296	4.74227	6.49501	1004.35	0.120949	0.730332	0.787001	0.0251789	0.0248544
17145.5	-13.2637	-100.891	5.21829	6.39926	1004.42	0.092813	0.536919	0.79937	0.0146576	0.0258512
17145.5	-13.394	-101.321	5.83052	6.27468	1004.35	0.11176	0.550533	0.866115	0.042326	0.0514321
17145.5	-13.3245	-101.103	5.49296	6.3069	1004.33	0.112201	0.496782	0.82671	0.036116	0.0330259
17145.5	-13.2172	-100.493	5.24498	6.36573	1004.28	0.104582	0.449898	0.858445	0.0460584	0.0397476
17145.6	-13.4172	-101.393	5.94486	6.22517	1004.21	0.107935	0.480813	0.857055	0.0385165	0.0409024
17145.6	-13.5975	-102.282	6.49848	6.14706	1004.28	0.119712	0.531275	0.880249	0.0403804	0.0524426
17145.6	-13.4771	-101.879	5.9382	6.20722	1004.33	0.166647	0.89587	0.871851	0.0542425	0.026606
17145.6	-13.2526	-100.582	5.4396	6.31673	1004.28	0.102981	0.461088	0.873982	0.0173888	0.0356332
17145.6	-13.2508	-100.415	5.59141	6.29736	1004.38	0.099353	0.482197	0.832802	0.0181216	0.0338746
17145.6	-13.2325	-100.348	5.51226	6.28706	1004.41	0.0908119	0.405407	0.810462	0.0120884	0.0343036
17145.6	-13.2269	-100.489	5.32595	6.27891	1004.31	0.0964965	0.422511	0.801386	0.015509	0.0326218
17145.6	-13.2396	-100.668	5.24883	6.27163	1004.32	0.092902	0.369759	0.823829	0.00620085	0.0382091
17145.6	-13.1932	-100.494	5.0517	6.30994	1004.4	0.0921787	0.430411	0.792025	0.0114935	0.0243495
17145.6	-13.273	-100.796	5.38821	6.29799	1004.42	0.120949	0.600061	0.855878	0.0271014	0.0345546
17145.6	-13.3536	-101.45	5.37948	6.28306	1004.36	0.0996559	0.488244	0.806625	0.0229103	0.0350666
17145.6	-13.298	-101.281	5.1032	6.32878	1004.34	0.114904	0.618813	0.817772	0.0164266	0.0250522
17145.6	-13.1983	-100.654	4.93198	6.34128	1004.36	0.097519	0.484813	0.845823	0.0207552	0.0278775
17145.6	-13.1457	-100.254	4.91155	6.34906	1004.35	0.0947591	0.467077	0.800892	0.0088861	0.0267322
17145.7	-13.0817	-99.907	4.74677	6.35737	1004.31	0.101807	0.531052	0.813527	0.0206849	0.0258121
17145.7	-13.0666	-99.7581	4.7745	6.37882	1004.34	0.0910005	0.427238	0.814926	0.0134885	0.036018
17145.7	-13.0233	-99.7884	4.3983	6.40997	1004.24	0.10636	0.666897	0.807552	0.016454	0.0494286
17145.7	-13.0471	-99.4696	4.90713	6.37241	1004.17	0.0912965	0.437055	0.79167	0.0251973	0.0359083
17145.7	-13.1132	-100.172	4.73338	6.3277	1004.26	0.0922133	0.363036	0.850938	0.00729938	0.0244331
17145.7	-13.0848	-100.009	4.66866	6.3355	1004.27	0.0900443	0.379317	0.814466	0.00882604	0.0415203
17145.7	-13.0509	-100.126	4.28125	6.37357	1004.24	0.0953237	0.372397	0.818348	0.0130933	0.0293851
17145.7	-12.9794	-99.6362	4.19879	6.40795	1004.17	0.1077	0.636238	0.840879	0.00970596	0.0449608
17145.7	-12.908	-99.1528	4.11083	6.38585	1004.1	0.0988397	0.419821	0.823817	0.00761218	0.03577
17145.7	-12.9563	-99.5692	4.0808	6.38985	1004.04	0.10127	0.401712	0.847167	0.0075107	0.05167
17145.7	-12.9606	-99.3456	4.339	6.39941	1003.96	0.100513	0.458932	0.860602	0.0088976	0.025068
17145.7	-13.0053	-99.2276	4.81454	6.37755	1003.89	0.0954512	0.454417	0.812125	0.0194581	0.0443234
17145.7	-13.1652	-99.7591	5.56266	6.27375	1003.89	0.115517	0.695819	0.81009	0.0350401	0.0569214
17145.7	-13.1682	-100.187	5.15864	6.26901	1003.9	0.0997127	0.449843	0.816197	0.0176479	0.0334714
17145.8	-13.1201	-99.9819	4.97856	6.26113	1003.89	0.0870902	0.379082	0.807435	0.00688794	0.0272645
17145.8	-13.1163	-100.174	4.7564	6.25819	1003.9	0.0883639	0.418559	0.801325	0.0125286	0.0329517
17145.8	-13.1266	-100.14	4.87292	6.23492	1003.93	0.0872068	0.353908	0.78793	0.00924833	0.0392087
17145.8	-13.1292	-100.093	4.94021	6.23898	1003.98	0.0834784	0.367374	0.794938	0.00501905	0.0374171
17145.8	-13.0949	-99.9581	4.80115	6.25308	1003.95	0.0934161	0.382782	0.790564	0.00485639	0.0235811
17145.8	-13.0653	-99.7164	4.8061	6.2504	1003.88	0.0881413	0.394963	0.741594	0.0114693	0.0425402
17145.8	-13.0903	-99.8734	4.84931	6.23447	1003.87	0.0979932	0.447903	0.8165	0.00783133	0.028418
17145.8	-13.0981	-100.002	4.78333	6.23729	1003.85	0.0999165	0.49986	0.819961	0.0125013	0.0288155
17145.8	-13.019	-99.5464	4.60554	6.25784	1003.74	0.0866178	0.373645	0.778128	0.00842155	0.0522455
17145.8	-13.0561	-99.8369	4.61166	6.23948	1003.64	0.0896703	0.400157	0.786937	0.00703618	0.0340384
17145.8	-13.0672	-99.9851	4.55276	6.25305	1003.57	0.0841835	0.42097	0.77798	0.00968689	0.0252176
17145.8	-13.054	-99.607	4.82521	6.2409	1003.54	0.0903239	0.375253	0.803911	0.0135058	0.0340883
17145.8	-13.0973	-99.9369	4.84171	6.21491	1003.5	0.0903088	0.419577	0.784223	0.0105458	0.0313212
17145.8	-13.1273	-100.088	4.93081	6.19509	1003.5	0.0907205	0.404383	0.814826	0.0146478	0.0243881
17145.8	-13.1847	-100.464	5.01305	6.16773	1003.43	0.096485	0.452725	0.829223	0.0144832	0.0281087
17145.9	-13.1534	-100.256	4.9708	6.17057	1003.36	0.0883527	0.432513	0.825366	0.00820628	0.0384879
17145.9	-13.0899	-99.986	4.73319	6.19548	1003.26	0.0876392	0.397712	0.781569	0.0147266	0.0278452
17145.9	-13.1173	-100.14	4.7987	6.19107	1003.25	0.102474	0.539703	0.821914	0.0188476	0.03827
17145.9	-13.1292	-100.161	4.87263	6.17054	1003.18	0.0967124	0.454607	0.788591	0.0223171	0.0337913
17145.9	-13.169	-100.482	4.86979	6.13864	1003.07	0.0918602	0.409347	0.788143	0.0160405	0.0368684
17145.9	-13.2456	-100.917	5.04829	6.10039	1003.09	0.0880073	0.37658	0.777021	0.0102771	0.0363592
17145.9	-13.1815	-100.86	4.59159	6.13154	1003.12	0.0990386	0.439366	0.830332	0.0177537	0.0281755
17145.9	-13.1131	-100.456	4.44899	6.17815	1003.12	0.090935	0.418714	0.806487	0.0186992	0.0322339
17145.9	-12.9733	-99.5868	4.19986	6.24106	1003.15	0.0942525	0.528754	0.824763	0.0139912	0.0321477
17145.9	-12.9789	-99.6369	4.19411	6.25858	1003.12	0.10638	0.546934	0.811422	0.0180648	0.0376784
17145.9	-12.9743	-99.4979	4.29619	6.26164	1003.01	0.0944455	0.435492	0.82664	0.0122283	0.0400256
17145.9	-13.0032	-99.6849	4.34102	6.2733	1002.87	0.0855573	0.393113	0.770038	0.0126279	0.0476781
17145.9	-12.9619	-99.3068	4.38815	6.2928	1002.81	0.0960629	0.449259	0.798029	0.00509987	0.0331253
17145.9	-12.9503	-99.3184	4.28438	6.29196	1002.79	0.0911439	0.470262	0.796995	0.0137764	0.0394699
17146	-12.9455	-99.1954	4.36898	6.29395	1002.71	0.090611	0.373902	0.806275	0.00580338	0.0265428
17146	-13.0148	-99.6804	4.43774	6.27062	1002.68	0.0982141	0.450784	0.789497	0.00296878	0.0313944
17146	-13.0139	-99.9145	4.19692	6.28957	1002.68	0.0899008	0.439864	0.813696	0.00742149	0.0321025
17146	-12.9799	-99.5225	4.3171	6.30236	1002.58	0.0965835	0.517085	0.826831	0.0143082	0.0354685
17146	-12.9881	-99.5969	4.30818	6.30919	1002.48	0.0782901	0.347376	0.773461	0.00354748	0.0880132
17146	NaN	NaN	NaN	NaN	1002.35	NaN	NaN	NaN	NaN	0.0326536
17146	NaN	NaN	NaN	NaN	1002.31	NaN	NaN	NaN	NaN	0.0313935
17146	NaN	NaN	NaN	NaN	1002.34	NaN	NaN	NaN	NaN	0.0468606
17146	NaN	NaN	NaN	NaN	1002.32	NaN	NaN	NaN	NaN	0.064121
17146	NaN	NaN	NaN	NaN	1002.37	NaN	NaN	NaN	NaN	0.0650038
17146	-17.2338	-126.457	11.4131	5.39669	1002.38	0.0797406	0.375794	0.761709	0.00419051	0.0552894
17146	-17.0073	-125.894	10.1646	5.43551	1002.24	0.184483	1.25314	1.04415	0.0300645	0.0395912
17146	-16.8579	-124.869	9.99382	5.45133	1002.19	0.147943	1.03682	0.841018	0.0102429	0.0329151
17146	-16.7747	-124.316	9.88178	5.45446	1002.08	0.10259	0.46694	0.834899	0.0294054	0.0410433
17146	-16.6435	-122.739	10.4083	5.47627	1002.01	0.0954953	0.433046	0.864261	0.0268509	0.0219759
17146.1	-16.7271	-123.854	9.96354	5.44706	1001.98	0.0953075	0.443408	0.775416	0.0176111	0.0364726
17146.1	-16.567	-122.664	9.87192	5.47812	1001.89	0.130646	0.853295	0.823877	0.01093	0.0358489
17146.1	-16.4863	-122.363	9.52659	5.45441	1001.81	0.107726	0.403129	0.874904	0.0160824	0.0463993
17146.1	-16.2267	-120.824	8.98972	5.50146	1001.72	0.182082	1.01246	0.964575	0.0238403	0.0340482
17146.1	-15.4214	-115.902	7.46957	5.60656	1001.63	0.281002	1.57286	1.09239	0.0557695	0.0326384
17146.1	-15.3063	-114.707	7.74331	5.7408	1001.56	0.242986	1.20835	1.04464	0.0588037	0.0316465
17146.1	-14.4145	-108.797	6.51893	5.98199	1001.63	0.227187	1.58649	0.823004	0.0610217	0.0459333
17146.1	-13.875	-104.998	6.00208	6.08261	1001.66	0.129243	0.755466	0.791347	0.0184723	0.0321861
17146.1	-13.7895	-104.066	6.25013	6.05906	1001.6	0.100964	0.577902	0.804339	0.0295411	0.0275817
17146.1	-13.904	-104.961	6.27056	6.00269	1001.53	0.0965088	0.584038	0.824094	0.0137452	0.0336812
17146.1	-13.9302	-105.011	6.43086	5.9803	1001.46	0.0949034	0.409131	0.840312	0.00965988	0.0299763
17146.1	-13.884	-105.017	6.05507	5.92286	1001.42	0.0938412	0.461232	0.814137	0.037051	0.0257152
17146.1	-13.911	-105.447	5.84118	5.86657	1001.36	0.106622	0.548547	0.804578	0.0392719	0.0375123
17146.1	-13.7639	-103.986	6.1251	5.91614	1001.27	0.0935388	0.35785	0.847895	0.0117913	0.0346737
17146.2	-13.9408	-104.636	6.88972	5.83702	1001.18	0.127149	0.67088	0.841057	0.0342793	0.0510774
17146.2	-13.9814	-105.116	6.7352	5.83564	1001.13	0.092983	0.374384	0.830371	0.0175888	0.0282969
17146.2	-13.9295	-104.844	6.59195	5.90306	1001.16	0.123431	0.823711	0.841012	0.025141	0.024881
17146.2	-13.7459	-103.402	6.56464	5.96662	1001.16	0.103506	0.476241	0.819006	0.0156264	0.028343
17146.2	-13.6676	-102.778	6.56266	5.97185	1001.13	0.108221	0.632699	0.829769	0.0290608	0.030046
17146.2	-13.7748	-103.889	6.30948	5.95586	1001.13	0.0917102	0.428187	0.804439	0.0208615	0.0384399
17146.2	-13.7414	-103.588	6.34291	5.98599	1001.06	0.090196	0.519604	0.828039	0.0102791	0.0369715
17146.2	-13.7325	-103.382	6.4782	5.97711	1001.11	0.0925946	0.419553	0.806376	0.0126162	0.0227309
17146.2	-13.7874	-103.391	6.9085	5.95305	1001.06	0.100003	0.615095	0.856027	0.0242967	0.021995
17146.2	-13.9343	-104.684	6.7905	5.90659	1001.03	0.0863717	0.454725	0.763827	0.00631167	0.0207791
17146.2	-13.9608	-105.359	6.3274	5.92339	1001	0.0922766	0.461607	0.796367	0.0126052	0.0300889
17146.2	-13.9971	-105.052	6.92424	5.91505	1000.98	0.115278	0.543454	0.823924	0.0181269	0.0248871
17146.2	-14.1544	-106.018	7.21774	5.87733	1001.01	0.0938904	0.385331	0.818229	0.0161483	0.0271587
17146.2	-14.3481	-106.964	7.82106	5.81704	1001.01	0.101382	0.426841	0.837706	0.0143986	0.0275198
17146.2	-14.3538	-107.334	7.49681	5.80357	1001.01	0.0943937	0.439775	0.785942	0.00751577	0.0230908
17146.3	-14.2854	-106.841	7.44141	5.81765	1001.02	0.0918581	0.365418	0.832568	0.00732726	0.0283491
17146.3	-14.3333	-106.983	7.68379	5.8039	1000.98	0.0950609	0.389082	0.817814	0.00539793	0.0260223
17146.3	-14.2761	-106.957	7.25166	5.82872	1000.98	0.0951184	0.442934	0.812495	0.0134072	0.0282084
17146.3	-14.2609	-106.696	7.39106	5.84022	1001.05	0.0865984	0.359248	0.790308	0.006433	0.0263556
17146.3	-14.3136	-106.836	7.67231	5.8257	1001.09	0.0883416	0.427007	0.788788	0.0115775	0.0317651
17146.3	-14.3237	-106.874	7.71527	5.81233	1001.18	0.088736	0.368465	0.819397	0.00802753	0.0501645
17146.3	-14.3731	-107.408	7.57711	5.83669	1001.28	0.0840335	0.398099	0.772873	0.0161255	0.0266529
17146.3	-14.4236	-107.175	8.21326	5.84188	1001.29	0.095341	0.370472	0.86641	0.0219793	0.0255918
17146.3	-14.5215	-107.82	8.35195	5.79332	1001.27	0.0926292	0.388556	0.823915	0.00529571	0.0313287
17146.3	-14.6656	-108.55	8.77462	5.76981	1001.3	0.107277	0.433905	0.865408	0.014495	0.0505677
17146.3	-14.7136	-109.031	8.67809	5.74353	1001.38	0.0891197	0.374695	0.777457	0.00642101	0.0319123
17146.3	-14.7479	-109.368	8.61486	5.72972	1001.52	0.089098	0.45254	0.767879	0.0138628	0.0583542
17146.3	-14.712	-109.427	8.26849	5.76574	1001.69	0.088091	0.412405	0.851495	0.0117044	0.0569728
17146.3	-14.6708	-108.804	8.56229	5.79857	1001.82	0.0938585	0.380501	0.881087	0.00862197	0.0454729
17146.4	-14.7178	-109.261	8.48112	5.77388	1001.88	0.0885985	0.353847	0.795391	0.00698777	0.0311183
17146.4	-14.6684	-109.223	8.12427	5.81006	1001.96	0.0889329	0.348509	0.789692	0.0195306	0.0349103
17146.4	-14.5983	-108.754	8.03224	5.86894	1002.06	0.100954	0.496287	0.820168	0.0106517	0.0274631
17146.4	-14.6885	-108.616	8.89193	5.87185	1002.11	0.142351	0.644019	0.902283	0.0112683	0.0240937
17146.4	-14.9298	-110.323	9.11529	5.8594	1002.18	0.0875818	0.437982	0.779561	0.0136509	0.0415566
17146.4	-14.9596	-110.891	8.78502	5.90513	1002.28	0.0842812	0.354595	0.756869	0.0146307	0.0323836
17146.4	-14.9257	-110.935	8.47087	5.93768	1002.37	0.0960047	0.491103	0.791012	0.00945453	0.026497
17146.4	-14.7289	-109.571	8.25962	5.94681	1002.43	0.103531	0.559333	0.779811	0.00625019	0.0265333
17146.4	-14.6523	-109.15	8.06833	5.91724	1002.49	0.0884564	0.370265	0.8014	0.0111782	0.0349865
17146.4	-14.7606	-109.92	8.16468	5.9101	1002.48	0.110341	0.581313	0.828015	0.00591735	0.0255631
17146.4	-14.9222	-111.33	8.04771	5.87742	1002.55	0.123083	0.711758	0.799685	0.0219587	0.0627598
17146.4	-15.4854	-115.376	8.50651	5.70115	1002.61	0.252976	1.74754	0.84199	0.0759011	0.0285896
17146.4	-15.8156	-118.198	8.32701	5.5642	1002.69	0.114658	0.588175	0.840997	0.0313804	0.0313363
17146.4	-15.9797	-119.793	8.0444	5.47015	1002.72	0.10594	0.570023	0.782329	0.0211419	0.0259566
17146.5	-15.8747	-119.74	7.25722	5.48365	1002.76	0.138364	0.707537	0.878271	0.0283278	0.0255789
17146.5	-15.7434	-119.491	6.45679	5.40168	1002.86	0.164223	1.16355	0.919167	0.0785587	0.0419859
17146.5	-15.6755	-119.261	6.1429	5.52093	1002.97	0.171401	1.12491	0.899461	0.141627	0.0615446
17146.5	-15.1917	-114.072	7.46176	5.93574	1003.06	0.142875	1.14931	0.868429	0.0547447	0.0347885
17146.5	-15.218	-114.847	6.89751	5.93593	1003.22	0.089931	0.566321	0.823647	0.0146165	0.0692113
17146.5	-15.3004	-115.537	6.86647	5.93745	1003.35	0.0891449	0.377094	0.789019	0.03334	0.0362622
17146.5	-15.4268	-116.158	7.25635	5.90468	1003.4	0.106262	0.550849	0.832927	0.0305039	0.0340163
17146.5	-15.4639	-116.313	7.3983	5.92629	1003.53	0.0987014	0.479066	0.818608	0.0257598	0.0336612
17146.5	-15.3684	-115.377	7.57069	5.977	1003.6	0.0904411	0.370126	0.814507	0.0127143	0.0365721
17146.5	-15.3732	-115.144	7.84209	5.98376	1003.79	0.0967756	0.397957	0.803389	0.0138836	0.0662744
17146.5	NaN	NaN	NaN	NaN	1003.96	NaN	NaN	NaN	NaN	0.0518262
17146.5	NaN	NaN	NaN	NaN	1003.96	NaN	NaN	NaN	NaN	0.037502
17146.5	NaN	NaN	NaN	NaN	1004	NaN	NaN	NaN	NaN	0.0484413
17146.5	NaN	NaN	NaN	NaN	1004.16	NaN	NaN	NaN	NaN	0.0530456
17146.5	NaN	NaN	NaN	NaN	1004.32	NaN	NaN	NaN	NaN	0.0576449
17146.6	NaN	NaN	NaN	NaN	1004.49	NaN	NaN	NaN	NaN	0.049098
17146.6	-15.5455	-114.944	9.42046	5.9154	1004.61	0.0920952	0.459272	0.777026	0.0190903	0.037344
17146.6	-15.4997	-114.867	9.13046	5.90296	1004.73	0.0863368	0.375916	0.788842	0.0171232	0.0518202
17146.6	-15.5004	-114.894	9.10982	5.8903	1004.86	0.0941061	0.383573	0.798727	0.00980688	0.0400864
17146.6	-15.523	-115.017	9.16695	5.91041	1004.92	0.0948412	0.411155	0.816018	0.0196258	0.0308237
17146.6	-15.473	-114.591	9.19314	5.93464	1004.93	0.0875536	0.374415	0.813313	0.0132246	0.0221508
17146.6	-15.4827	-114.503	9.35826	5.91957	1005.03	0.0872627	0.36815	0.771199	0.0116627	0.0588325
17146.6	-15.4894	-114.708	9.20748	5.9218	1005.14	0.0961105	0.357561	0.845158	0.0134506	0.0587863
17146.6	-15.7461	-116.809	9.16022	5.85074	1005.35	0.121123	0.730372	0.777593	0.0116292	0.0467316
17146.6	-15.8236	-117.523	9.06629	5.84858	1005.59	0.092234	0.345324	0.811887	0.00863892	0.0881911
17146.6	-15.9405	-118.527	8.99774	5.81792	1005.8	0.0930728	0.483937	0.833683	0.0132522	0.034763
17146.6	-16.0143	-118.902	9.21246	5.76796	1005.88	0.0894353	0.426383	0.801574	0.0119009	0.0496853
17146.6	-16.1116	-119.5	9.3928	5.74191	1006.01	0.10331	0.569807	0.792443	0.0146705	0.0776753
17146.6	-16.232	-120.464	9.39236	5.70895	1006.25	0.0877548	0.386916	0.779745	0.00607538	0.0863466
17146.7	-16.2422	-120.626	9.31178	5.69925	1006.35	0.0957597	0.48895	0.819467	0.00971884	0.0267673
17146.7	-16.385	-122.201	8.87891	5.64642	1006.45	0.0996009	0.561742	0.833151	0.0173984	0.0629887
17146.7	-16.3833	-122.257	8.80915	5.6486	1006.65	0.083994	0.363576	0.774972	0.00633989	0.0762782
17146.7	-16.4372	-122.666	8.83203	5.64894	1006.79	0.0867193	0.361997	0.818395	0.00881965	0.0277719
17146.7	-16.4187	-122.601	8.7486	5.64986	1006.87	0.108	0.580964	0.856776	0.0210011	0.0456695
17146.7	-16.3409	-121.826	8.90108	5.65907	1007.02	0.121348	0.724936	0.821437	0.0120905	0.045513
17146.7	-16.4562	-122.848	8.80141	5.65022	1007.16	0.090015	0.419991	0.806447	0.0106518	0.0577455
17146.7	-16.4364	-122.612	8.87908	5.64456	1007.3	0.0927865	0.457185	0.82782	0.00636766	0.0471155
17146.7	-16.3397	-121.723	8.99454	5.6374	1007.4	0.0936481	0.383256	0.779101	0.0077742	0.0296112
17146.7	-16.4654	-122.995	8.72781	5.619	1007.48	0.09621	0.674285	0.857212	0.0110581	0.0776534
17146.7	-16.36	-122.373	8.50668	5.64278	1007.67	0.0972609	0.474376	0.801803	0.010192	0.0407331
17146.7	-16.1908	-120.841	8.68574	5.67127	1007.88	0.0968656	0.559746	0.797166	0.00682551	0.0600329
17146.7	-16.1949	-120.814	8.74573	5.67979	1007.92	0.0853702	0.341873	0.804679	0.0061596	0.0421647
17146.7	-16.1946	-120.724	8.83301	5.6804	1008.05	0.0864253	0.360779	0.799749	0.00444453	0.0459606
17146.8	-16.2182	-121.046	8.69978	5.68617	1008.34	0.0886892	0.339777	0.810009	0.0103317	0.100229
17146.8	-16.1802	-120.842	8.59981	5.6781	1008.52	0.0864692	0.389613	0.770774	0.00812949	0.0457496
17146.8	-16.1861	-120.585	8.90388	5.68171	1008.73	0.0937725	0.361545	0.817725	0.0082768	0.0836298
17146.8	-16.3082	-121.33	9.1355	5.67584	1008.95	0.0940975	0.382721	0.829442	0.00799364	0.0685812
17146.8	-16.4259	-122.232	9.17443	5.65427	1009.15	0.0909792	0.457021	0.766301	0.00999044	0.0558185
17146.8	-16.5166	-123.196	8.93674	5.62438	1009.25	0.0835979	0.370053	0.761776	0.00776094	0.0370606
17146.8	-16.6255	-123.99	9.01375	5.60583	1009.46	0.0930687	0.520681	0.792625	0.00777756	0.0807683
17146.8	-16.8092	-125.334	9.13978	5.58791	1009.6	0.10553	0.541525	0.814386	0.0100388	0.0354907
17146.8	-17.1421	-127.71	9.42615	5.53858	1009.77	0.131512	0.784507	0.793837	0.0240679	0.0434241
17146.8	-17.3181	-129.12	9.42441	5.48776	1009.78	0.087339	0.354396	0.757828	0.00613458	0.0369027
17146.8	-17.5208	-130.324	9.84303	5.45442	1009.91	0.135936	0.737495	0.787397	0.0194652	0.0431493
17146.8	-17.6869	-131.624	9.87119	5.40965	1009.96	0.1063	0.480444	0.851129	0.00738836	0.0276963
17146.8	-17.8084	-132.613	9.85371	5.37403	1010.06	0.0904047	0.430076	0.791006	0.0124814	0.0368651
17146.8	-17.7915	-132.453	9.87931	5.38243	1010.12	0.0920227	0.372673	0.82512	0.0116163	0.0309437
17146.8	-17.811	-132.59	9.89788	5.39199	1010.14	0.088257	0.36854	0.788497	0.00438107	0.0256252
17146.9	-17.7451	-132.192	9.76885	5.3949	1010.2	0.0953771	0.464291	0.803881	0.00525675	0.043085
17146.9	-17.6112	-131.248	9.64175	5.38416	1010.3	0.114757	0.622273	0.821847	0.0137526	0.038891
17146.9	-17.8117	-132.844	9.64915	5.24631	1010.41	0.199267	1.56161	0.866296	0.0908413	0.0341791
17146.9	-17.9206	-134.347	9.01743	5.18108	1010.61	0.131366	0.877074	0.817073	0.062856	0.0759007
17146.9	-17.7319	-132.587	9.26855	5.29849	1010.81	0.101323	0.571705	0.828326	0.0544772	0.0298377
17146.9	-18.0058	-135.378	8.66761	5.03331	1010.87	0.121018	0.712412	0.930113	0.0892458	0.0357465
17146.9	-18.1749	-137.578	7.82162	4.82943	1010.8	0.159774	0.891692	0.930741	0.0646215	0.0367171
17146.9	-17.464	-131.675	8.03718	5.09455	1010.77	0.21815	1.94782	0.899741	0.0697798	0.0247243
17146.9	-17.2907	-129.93	8.39493	5.07822	1010.9	0.119585	0.683456	0.804686	0.0254432	0.0505879
17146.9	-17.2434	-129.037	8.90995	5.07064	1011.02	0.0983451	0.666981	0.817386	0.0118574	0.0388121
17146.9	-17.1573	-127.969	9.28905	5.07508	1011.09	0.0928414	0.405691	0.774437	0.0170679	0.0305755
17146.9	-17.2122	-128.746	8.95178	5.07316	1011.2	0.102179	0.466277	0.84858	0.0119123	0.0783832
17146.9	-17.0521	-127.919	8.49766	5.10668	1011.48	0.11465	0.547434	0.849523	0.0126109	0.0656302
17146.9	-16.9004	-126.882	8.32067	5.12069	1011.61	0.0953615	0.430949	0.796768	0.0159618	0.0383894
17147	-16.9466	-127.12	8.4535	5.08537	1011.71	0.111491	0.546381	0.805212	0.0116734	0.0744963
17147	-16.9219	-126.955	8.42018	5.0372	1011.94	0.105067	0.53075	0.823021	0.0242151	0.103097
17147	-17.193	-128.563	8.98081	5.00781	1012.2	0.10408	0.457348	0.838419	0.00957854	0.0839104
17147	-17.3804	-129.764	9.27869	5.0371	1012.33	0.104865	0.526653	0.822188	0.00979169	0.0318971
17147	-17.4841	-130.599	9.27423	5.02168	1012.42	0.0942432	0.41516	0.782113	0.0148861	0.0514614
17147	-17.6042	-131.482	9.35208	4.99627	1012.58	0.0928326	0.445838	0.795514	0.00802379	0.0433582
17147	-17.6635	-132.013	9.29489	4.98408	1012.68	0.0900512	0.366829	0.806875	0.00643477	0.0494539
17147	-17.7935	-132.644	9.7041	4.96208	1012.76	0.090818	0.372034	0.851098	0.0049677	0.0421672
17147	-17.8149	-132.627	9.89246	4.9431	1012.86	0.0988847	0.409347	0.870199	0.0153299	0.0482338
17147	-17.84	-133.286	9.43375	4.88239	1013.03	0.0927707	0.384668	0.847544	0.0121199	0.0843293
17147	-17.8505	-133.495	9.30854	4.85425	1013.32	0.0943325	0.386364	0.836778	0.0138771	0.0369996
17147	-17.8754	-133.722	9.28147	4.84059	1013.42	0.0952809	0.366829	0.847672	0.00697714	0.0547495
17147	-17.8405	-133.354	9.36997	4.84595	1013.5	0.0917094	0.369144	0.816134	0.00539271	0.0678501
17147	-17.8103	-133.159	9.3235	4.83479	1013.74	0.0990842	0.42626	0.830735	0.00528925	0.0447139
17147	-17.7714	-132.648	9.52355	4.84373	1013.89	0.0867056	0.366888	0.812392	0.00511376	0.0471096
17147.1	NaN	NaN	NaN	NaN	1014	NaN	NaN	NaN	NaN	0.0304308
17147.1	NaN	NaN	NaN	NaN	1014.01	NaN	NaN	NaN	NaN	0.0323909
17147.1	NaN	NaN	NaN	NaN	1013.93	NaN	NaN	NaN	NaN	0.0393432
17147.1	NaN	NaN	NaN	NaN	1013.93	NaN	NaN	NaN	NaN	0.0595194
17147.1	NaN	NaN	NaN	NaN	1014.1	NaN	NaN	NaN	NaN	0.047519
17147.1	NaN	NaN	NaN	NaN	1014.17	NaN	NaN	NaN	NaN	0.0341365
17147.1	-18.0931	-134.809	9.93519	4.70138	1014.21	0.0939437	0.416526	0.838523	0.0109428	0.0393997
17147.1	-18.1241	-135.137	9.85618	4.68458	1014.17	0.0890843	0.35677	0.816605	0.00357912	0.0575331
17147.1	-18.098	-135.061	9.72271	4.68559	1014.41	0.0942613	0.362203	0.827152	0.00418743	0.0420792
17147.1	-18.0765	-134.991	9.62151	4.69191	1014.35	0.0913303	0.361086	0.829695	0.00305866	0.0408286
17147.1	-18.0973	-135.005	9.77354	4.70969	1014.4	0.0869861	0.369533	0.787467	0.00882082	0.0735322
17147.1	-18.144	-135.225	9.92641	4.73191	1014.49	0.114122	0.59811	0.846629	0.00790093	0.0316691
17147.1	-18.2819	-136.457	9.79842	4.68779	1014.51	0.0951545	0.404558	0.854232	0.012696	0.0318113
17147.1	-18.3324	-136.953	9.7065	4.671	1014.51	0.0944145	0.437553	0.818761	0.00785853	0.0354565
17147.2	-18.2497	-136.464	9.53329	4.6931	1014.58	0.0992635	0.449733	0.827436	0.0120747	0.0252284
17147.2	-18.2014	-136.029	9.58236	4.71783	1014.62	0.0919849	0.35875	0.827124	0.00303162	0.0448126
17147.2	-18.2628	-136.354	9.74849	4.7245	1014.68	0.0916862	0.368594	0.837889	0.00962262	0.0444453
17147.2	-18.3081	-136.659	9.80629	4.72204	1014.74	0.0919782	0.377605	0.820064	0.00458818	0.040287
17147.2	-18.4549	-137.718	9.92128	4.71559	1014.78	0.0977523	0.473487	0.839739	0.0127199	0.027483
17147.2	-18.3545	-137.116	9.72013	4.73152	1014.72	0.0926705	0.365941	0.850379	0.0058115	0.0295806
17147.2	-18.4118	-137.437	9.85704	4.70546	1014.71	0.0970967	0.384963	0.867781	0.00558445	0.03052
17147.2	-18.4135	-137.654	9.65351	4.70571	1014.75	0.0919607	0.342893	0.829429	0.00614762	0.034466
17147.2	-18.454	-138.053	9.57975	4.68619	1014.89	0.0933373	0.363541	0.836714	0.00598326	0.0352689
17147.2	-18.4203	-137.794	9.56834	4.70199	1014.88	0.100927	0.417689	0.851433	0.0171415	0.0273399
17147.2	-18.3452	-137.234	9.52774	4.75744	1014.98	0.0925442	0.414677	0.827539	0.0173216	0.0348581
17147.2	-18.2517	-136.386	9.62793	4.80049	1014.98	0.092987	0.411674	0.86459	0.00684494	0.0482329
17147.2	-18.2526	-136.28	9.74093	4.8078	1015.03	0.094564	0.371071	0.849405	0.00664241	0.0560347
17147.2	-18.2128	-135.945	9.75728	4.82215	1015.18	0.0898468	0.361676	0.820713	0.0052496	0.0455575
17147.2	-18.2373	-136.013	9.88515	4.83363	1015.18	0.0916364	0.369516	0.819355	0.0130155	0.0474408
17147.3	-18.1446	-135.275	9.8813	4.88246	1015.15	0.092233	0.381649	0.84201	0.0130402	0.0501908
17147.3	-18.0817	-134.706	9.94767	4.92544	1015.32	0.0848499	0.386017	0.762337	0.0128556	0.0863803
17147.3	-18.0881	-134.557	10.1479	4.95353	1015.43	0.0915213	0.352071	0.819693	0.00801996	0.0427049
17147.3	-18.1873	-134.701	10.7973	4.97849	1015.49	0.0917488	0.375357	0.834077	0.00861718	0.0915141
17147.3	-18.1803	-134.477	10.9655	5.0051	1015.66	0.0891473	0.389675	0.8004	0.00970678	0.0367141
17147.3	-18.1135	-133.841	11.0672	5.02929	1015.79	0.0944397	0.417717	0.817463	0.00990315	0.0462856
17147.3	-17.9741	-132.663	11.1298	5.05072	1015.89	0.0926161	0.455992	0.81402	0.00961724	0.0316263
17147.3	-17.9049	-131.783	11.4562	5.0636	1015.88	0.0958252	0.446406	0.841817	0.00882465	0.0719577
17147.3	-17.8271	-131.171	11.4465	5.06055	1016.2	0.0951726	0.388008	0.860515	0.00824132	0.0734448
17147.3	-17.8071	-130.852	11.6052	5.05089	1016.3	0.0901441	0.357549	0.813793	0.0067109	0.0403508
17147.3	-17.8099	-130.779	11.7003	5.03227	1016.31	0.0856472	0.34661	0.762432	0.0116152	0.0319692
17147.3	-17.8789	-131.156	11.8752	5.00033	1016.3	0.088774	0.33769	0.810068	0.0110765	0.060391
17147.3	-17.8391	-130.971	11.7421	4.9698	1016.36	0.09088	0.363062	0.818381	0.00886491	0.0412109
17147.3	-17.872	-131.331	11.6445	4.92511	1016.29	0.088317	0.365327	0.819387	0.0165302	0.0489161
17147.4	-17.9086	-131.907	11.3622	4.8958	1016.29	0.0870548	0.345034	0.795619	0.00356566	0.0539177
17147.4	-17.9287	-131.826	11.6042	4.9067	1016.42	0.09044	0.434469	0.792414	0.00695897	0.0658892
17147.4	-17.8566	-131.311	11.5418	4.90694	1016.53	0.0978222	0.379885	0.860726	0.0037354	0.0374083
17147.4	-17.8357	-131.077	11.6083	4.9134	1016.47	0.110399	0.492332	0.82623	0.00484096	0.0401539
17147.4	-17.7553	-130.524	11.5188	4.91313	1016.39	0.0900453	0.361157	0.852519	0.00876084	0.0563181
17147.4	-17.8102	-130.829	11.6526	4.86904	1016.29	0.0930064	0.370935	0.813144	0.0180381	0.0285658
17147.4	-17.9728	-131.995	11.7874	4.80627	1016.37	0.0996063	0.477128	0.791436	0.0116131	0.0494074
17147.4	-18.0029	-132.161	11.8624	4.8081	1016.44	0.0916563	0.402899	0.783572	0.00588102	0.0353247
17147.4	-18.0087	-131.997	12.0734	4.7934	1016.45	0.105861	0.429498	0.860009	0.0197739	0.0327035
17147.4	-18.1909	-133.47	12.0574	4.71066	1016.42	0.101877	0.624981	0.773388	0.0275696	0.0453468
17147.4	-18.3876	-135.147	11.9539	4.65073	1016.37	0.111325	0.652439	0.78751	0.0148142	0.0351626
17147.4	-18.5028	-136.416	11.607	4.63554	1016.28	0.0903501	0.416317	0.821215	0.00581907	0.038721
17147.4	-18.58	-137.144	11.4966	4.62571	1016.36	0.0921352	0.373689	0.842974	0.00269929	0.05339
17147.4	-18.5484	-137.034	11.3534	4.65471	1016.27	0.0924155	0.38568	0.815765	0.0154538	0.0622239
17147.5	-18.5147	-136.907	11.2107	4.68612	1016.16	0.0922379	0.372191	0.803654	0.0100966	0.0548666
17147.5	-18.5371	-137.03	11.2667	4.70253	1016.19	0.0912643	0.346226	0.855355	0.00557592	0.033169
17147.5	-18.597	-137.253	11.5227	4.70808	1016.13	0.0965137	0.394119	0.829867	0.00539423	0.0331785
17147.5	-18.6787	-137.716	11.7142	4.70413	1016.03	0.0974449	0.448154	0.854873	0.00990792	0.0624353
17147.5	-18.8967	-139.137	12.0365	4.64482	1015.84	0.12119	0.596269	0.883258	0.0281122	0.0493202
17147.5	-19.1909	-141.102	12.4256	4.51401	1015.82	0.126772	0.727838	0.83712	0.0375208	0.0465736
17147.5	-19.4675	-142.946	12.7937	4.42233	1015.81	0.121823	0.705652	0.866716	0.0216827	0.0450218
17147.5	-19.5734	-143.861	12.726	4.40024	1015.73	0.0874381	0.368524	0.816979	0.00762128	0.0396037
17147.5	-19.504	-143.518	12.5138	4.43316	1015.75	0.099811	0.468983	0.811463	0.0205177	0.030817
17147.5	-19.4057	-142.617	12.6287	4.50622	1015.74	0.0948349	0.393523	0.861474	0.0234163	0.0438821
17147.5	-19.3658	-142.198	12.7283	4.56812	1015.81	0.0942735	0.390952	0.832904	0.0173346	0.0348143
17147.5	-19.3519	-142.06	12.7547	4.61789	1015.78	0.0978345	0.417163	0.850236	0.0113535	0.0256551
17147.5	-19.5031	-143.145	12.8798	4.64504	1015.66	0.102611	0.539454	0.846954	0.00834297	0.0708822
17147.5	-19.6087	-143.918	12.9518	4.66386	1015.58	0.0988901	0.401843	0.857399	0.00865437	0.0448491
17147.5	-19.7125	-144.626	13.0741	4.6616	1015.41	0.09131	0.403033	0.826425	0.00763342	0.0481314
17147.6	-19.7421	-145.122	12.8142	4.66461	1015.39	0.093292	0.368942	0.851424	0.00748836	0.0289816
17147.6	-19.7254	-145.263	12.54	4.66537	1015.38	0.0933025	0.361796	0.851525	0.0055674	0.0500744
17147.6	-19.7526	-145.9	12.1208	4.65702	1015.23	0.092915	0.385195	0.842651	0.00493533	0.0392533
17147.6	-19.7689	-146.223	11.9278	4.6471	1015.16	0.0977211	0.399981	0.880283	0.0103943	0.0362391
17147.6	-19.7336	-146.275	11.5937	4.64479	1015.15	0.0943558	0.368241	0.835698	0.00648862	0.0298307
17147.6	NaN	NaN	NaN	NaN	1015.17	NaN	NaN	NaN	NaN	0.0516632
17147.6	NaN	NaN	NaN	NaN	1015.26	NaN	NaN	NaN	NaN	0.0266671
17147.6	NaN	NaN	NaN	NaN	1015.18	NaN	NaN	NaN	NaN	0.0520527
17147.6	NaN	NaN	NaN	NaN	1015.1	NaN	NaN	NaN	NaN	0.0293282
17147.6	NaN	NaN	NaN	NaN	1015.07	NaN	NaN	NaN	NaN	0.0257105
17147.6	NaN	NaN	NaN	NaN	1015.07	NaN	NaN	NaN	NaN	0.0250244
17147.6	-19.3387	-142.96	11.75	4.65623	1015.07	0.0917312	0.371686	0.825277	0.00889332	0.0276493
17147.6	-19.3579	-142.776	12.0875	4.65016	1014.93	0.0911196	0.361408	0.834657	0.00883824	0.0388239
17147.6	-19.3533	-142.947	11.8794	4.61759	1014.92	0.0890038	0.417892	0.827675	0.010752	0.0354814
17147.7	-19.3865	-143.308	11.7837	4.6056	1014.9	0.09522	0.36541	0.871337	0.00697395	0.0342604
17147.7	-19.3253	-142.933	11.6688	4.6167	1014.82	0.0949281	0.39939	0.829123	0.00372057	0.0465156
17147.7	-19.2937	-142.816	11.5339	4.62256	1014.74	0.0979694	0.393525	0.868304	0.00328277	0.029291
17147.7	-19.4114	-143.487	11.8036	4.61107	1014.68	0.0947278	0.4053	0.814098	0.00450073	0.0511691
17147.7	-19.5425	-144.18	12.1595	4.61643	1014.58	0.0908334	0.354768	0.827654	0.00991233	0.0249361
17147.7	-19.4408	-143.591	11.9356	4.65071	1014.57	0.102519	0.513615	0.818307	0.012401	0.0282596
17147.7	-19.2545	-142.436	11.6008	4.68863	1014.52	0.103376	0.463335	0.896686	0.00995144	0.0284174
17147.7	-19.2103	-141.959	11.7232	4.70637	1014.53	0.0887728	0.355707	0.801129	0.00421478	0.0325241
17147.7	-19.2174	-141.969	11.7699	4.71442	1014.47	0.0997554	0.368099	0.890204	0.00375065	0.0349872
17147.7	-19.2979	-142.365	12.019	4.71946	1014.33	0.0931771	0.370522	0.83701	0.00493085	0.0756668
17147.7	-19.2702	-142.184	11.9776	4.73204	1014.28	0.092074	0.379055	0.807758	0.00903225	0.0479391
17147.7	-19.1953	-141.466	12.0962	4.75632	1014.21	0.0957532	0.460598	0.833623	0.00728266	0.0338418
17147.7	-19.0961	-140.5	12.2684	4.77771	1014.15	0.102582	0.468811	0.833392	0.00895419	0.025617
17147.7	-18.9596	-139.739	11.9379	4.79755	1014.1	0.0956818	0.402834	0.799537	0.00647051	0.0405467
17147.8	-18.8737	-139.12	11.8697	4.81293	1014.02	0.0986297	0.444546	0.859416	0.00772595	0.0349378
17147.8	-18.8117	-138.449	12.0451	4.83029	1013.91	0.0915299	0.426306	0.832869	0.00641913	0.0346467
17147.8	-18.7103	-137.829	11.8538	4.84476	1013.87	0.0960123	0.396215	0.811299	0.00891943	0.0605096
17147.8	-18.6113	-137.257	11.6334	4.85959	1013.69	0.0930852	0.3831	0.781074	0.00775583	0.0439645
17147.8	-18.5241	-136.605	11.5872	4.88063	1013.65	0.0922836	0.40939	0.81752	0.00705213	0.0277088
17147.8	-18.4757	-136.138	11.6679	4.89785	1013.56	0.0862288	0.399688	0.797172	0.00805329	0.0622187
17147.8	-18.3322	-135.217	11.44	4.9222	1013.44	0.0976069	0.483331	0.791782	0.0123051	0.0307249
17147.8	-18.2668	-134.646	11.4891	4.93237	1013.36	0.0889385	0.387656	0.765256	0.0165208	0.0387702
17147.8	-18.3654	-135.412	11.5118	4.86554	1013.28	0.0896693	0.414486	0.800488	0.0148147	0.0332074
17147.8	-18.359	-135.651	11.2216	4.84506	1013.3	0.0902757	0.350309	0.801744	0.00285417	0.0312013
17147.8	-18.2353	-134.82	11.0626	4.88231	1013.35	0.104992	0.489664	0.839708	0.0171624	0.0418677
17147.8	-18.0708	-133.617	10.949	4.92899	1013.42	0.0924348	0.42153	0.806594	0.00731957	0.031912
17147.8	-18.0658	-133.436	11.0904	4.92646	1013.43	0.093691	0.363864	0.830805	0.00896609	0.025614
17147.8	-18.1088	-133.794	11.076	4.89402	1013.45	0.0894571	0.410293	0.795235	0.0102544	0.0269482
17147.8	-18.1132	-133.888	11.018	4.88874	1013.35	0.0925045	0.355321	0.819826	0.00555627	0.0466429
17147.9	-18.0294	-133.404	10.8316	4.90151	1013.27	0.0886872	0.373885	0.800526	0.00681577	0.0433049
17147.9	-17.9216	-132.436	10.9367	4.94984	1013.17	0.098409	0.509208	0.802282	0.0152425	0.0362503
17147.9	-17.8016	-131.509	10.9033	4.99132	1013.19	0.0911658	0.426872	0.763465	0.0127292	0.0263932
17147.9	-17.6292	-130.238	10.7961	5.03832	1013.19	0.105432	0.588231	0.83541	0.0132805	0.0256401
17147.9	-17.6287	-129.926	11.1033	5.04016	1013.15	0.0940027	0.347609	0.842057	0.00359582	0.0306621
17147.9	-17.5453	-129.627	10.736	5.04117	1013.05	0.0915372	0.439565	0.795862	0.00541225	0.0382626
17147.9	-17.517	-129.261	10.8748	5.04373	1013.01	0.0912287	0.359434	0.848281	0.00320475	0.0569835
17147.9	-17.4305	-128.629	10.8146	5.07773	1012.82	0.0991493	0.5334	0.816123	0.0143817	0.0671789
17147.9	-17.2591	-127.2	10.8734	5.12122	1012.7	0.109984	0.591236	0.789654	0.0144158	0.0378358
17147.9	-17.0472	-125.716	10.6621	5.16099	1012.74	0.0939899	0.425956	0.820441	0.00676743	0.0278755
17147.9	-17.0008	-125.167	10.8395	5.17227	1012.75	0.0883533	0.359433	0.788852	0.00778213	0.0425929
17147.9	-16.9318	-124.731	10.7228	5.17807	1012.78	0.0892873	0.371747	0.781783	0.004958	0.0314318
17147.9	-16.8018	-123.935	10.4799	5.21051	1012.66	0.102189	0.46666	0.830105	0.0119653	0.0385894
17147.9	-16.6925	-123.035	10.5056	5.24018	1012.6	0.0892399	0.396316	0.797283	0.00902414	0.0294117
17148	-16.5794	-122.199	10.4362	5.26909	1012.59	0.0967727	0.4584	0.76731	0.00856512	0.030276
17148	-16.5444	-121.811	10.5444	5.28295	1012.56	0.0844315	0.346758	0.770161	0.00505702	0.0333485
17148	-16.5229	-121.69	10.4934	5.28888	1012.52	0.0894664	0.345869	0.824318	0.00521848	0.0348325
17148	-16.4405	-121.205	10.3188	5.3003	1012.44	0.0856015	0.366585	0.785033	0.0059119	0.0364168
17148	-16.3883	-120.972	10.1338	5.31678	1012.31	0.0893374	0.378388	0.778439	0.01008	0.0551833
17148	-16.2617	-120.173	9.92141	5.35847	1012.31	0.101764	0.427367	0.842079	0.015559	0.0277722
17148	-16.1505	-119.367	9.83716	5.39906	1012.31	0.0967987	0.378571	0.828927	0.0122211	0.0287831
17148	-16.064	-118.664	9.84796	5.43973	1012.15	0.0955708	0.364095	0.852031	0.00575399	0.0316444
17148	-16.1091	-119.018	9.85473	5.41939	1012.19	0.0933967	0.45387	0.80698	0.0186765	0.0403098
17148	-16.1929	-119.72	9.82299	5.38843	1012.13	0.0847123	0.350458	0.793105	0.00472178	0.0278623
17148	-16.1507	-119.356	9.8496	5.40425	1012.21	0.0967318	0.385586	0.840713	0.0105047	0.025549
17148	-16.04	-118.615	9.70514	5.43439	1012.24	0.0928051	0.357617	0.794071	0.00977684	0.046645
17148	-15.9129	-117.814	9.48999	5.47335	1012.2	0.0978779	0.407212	0.813879	0.00963704	0.0502083
17148	-15.8495	-117.347	9.44897	5.49259	1012.06	0.0836658	0.338874	0.778269	0.0047135	0.05671
17148	-15.8013	-117.121	9.28945	5.50125	1011.95	0.0845219	0.372255	0.788844	0.00528271	0.0663434
17148.1	-15.7824	-116.777	9.48244	5.5236	1011.81	0.0912367	0.354253	0.813161	0.0109223	0.0342447
17148.1	-15.5031	-114.964	9.06144	5.61019	1011.72	0.153517	0.887503	0.815399	0.0268192	0.0468876
17148.1	-15.1702	-112.709	8.65299	5.68888	1011.66	0.108917	0.642666	0.793306	0.0198386	0.0385155
17148.1	-15.1207	-112.383	8.58301	5.6802	1011.72	0.0882088	0.361181	0.780277	0.0139461	0.0530069
17148.1	-15.1376	-112.886	8.21484	5.65301	1011.49	0.0942315	0.344084	0.842725	0.00475028	0.0500492
17148.1	-15.0951	-112.811	7.94971	5.66504	1011.34	0.0878989	0.366467	0.764018	0.0104421	0.0993484
17148.1	-14.9473	-111.919	7.6591	5.71157	1011.49	0.123487	0.664277	0.832315	0.0245922	0.0280436
17148.1	-14.7583	-110.467	7.59952	5.77059	1011.38	0.0946586	0.447594	0.829099	0.0100572	0.0444682
17148.1	-14.751	-110.492	7.51588	5.76773	1011.36	0.0830475	0.336819	0.760326	0.00392734	0.0280219
17148.1	-14.6883	-110.259	7.24705	5.78285	1011.28	0.090602	0.365653	0.811761	0.00684926	0.0807386
17148.1	NaN	NaN	NaN	NaN	1011.24	NaN	NaN	NaN	NaN	0.0318535
17148.1	NaN	NaN	NaN	NaN	1011.17	NaN	NaN	NaN	NaN	0.0395269
17148.1	NaN	NaN	NaN	NaN	1011.16	NaN	NaN	NaN	NaN	0.0411694
17148.1	NaN	NaN	NaN	NaN	1011.18	NaN	NaN	NaN	NaN	0.0478893
17148.2	NaN	NaN	NaN	NaN	1011.13	NaN	NaN	NaN	NaN	0.0312225
17148.2	NaN	NaN	NaN	NaN	1011.1	NaN	NaN	NaN	NaN	0.0338189
17148.2	-13.5537	-102.443	5.98709	6.15937	1011.04	0.0985484	0.590166	0.754158	0.00971081	0.036537
17148.2	-13.6461	-103.29	5.87889	6.12022	1010.97	0.0887893	0.394616	0.77635	0.0123076	0.0289174
17148.2	-13.6088	-103.204	5.66638	6.11655	1010.97	0.101925	0.446319	0.80244	0.00980167	0.041677
17148.2	-13.895	-104.874	6.28571	6.0937	1010.93	0.114509	0.661337	0.773938	0.0231072	0.0325188
17148.2	-14.1347	-106.384	6.69357	6.00313	1010.9	0.0847302	0.502304	0.865043	0.0235164	0.0382547
17148.2	-14.1189	-105.749	7.20223	6.00998	1010.98	0.0898003	0.57724	0.805802	0.0156504	0.049485
17148.2	-14.0235	-105.419	6.76933	6.09518	1010.96	0.103918	0.624777	0.77107	0.020657	0.103443
17148.2	-15.0359	-111.926	8.36073	6.11631	1011.16	0.725585	4.8281	1.31322	0.0164473	0.0607661
17148.2	-16.5889	-122.988	9.72289	6.0118	1011.42	0.380398	2.75545	0.873474	0.0777055	0.082284
17148.2	-17.6437	-131.095	10.0546	5.6725	1011.68	0.176961	1.22832	0.861045	0.0948994	0.0860251
17148.2	-18.0938	-134.241	10.5098	5.36956	1011.88	0.142266	0.915001	0.792031	0.0429433	0.041603
17148.2	-18.3131	-136.433	10.0717	5.3305	1011.88	0.0952944	0.420757	0.851961	0.00745751	0.0244316
17148.2	-18.3027	-136.445	9.97628	5.29143	1011.96	0.0949707	0.409869	0.815306	0.0175035	0.0429464
17148.3	-18.2851	-136.337	9.94354	5.27525	1012.05	0.0926711	0.416288	0.831392	0.0116911	0.0327813
17148.3	-18.3083	-136.709	9.75801	5.25963	1012.1	0.0944423	0.406506	0.823759	0.00972143	0.0353236
17148.3	-18.2582	-136.666	9.39972	5.27274	1012.18	0.0918951	0.420223	0.794561	0.00837565	0.0293167
17148.3	-18.2897	-137.092	9.22532	5.26241	1012.27	0.0846549	0.343778	0.785785	0.00551026	0.0367078
17148.3	-18.2708	-137.095	9.07124	5.25823	1012.35	0.0956282	0.39949	0.818376	0.0122558	0.0291987
17148.3	-18.1711	-136.697	8.67186	5.2719	1012.48	0.105659	0.450856	0.840257	0.010275	0.0716853
17148.3	-18.0126	-135.839	8.26137	5.3053	1012.6	0.117578	0.551468	0.854757	0.0253718	0.0344144
17148.3	-17.8014	-134.463	7.94826	5.40347	1012.73	0.0995575	0.508972	0.824254	0.0199784	0.0562426
17148.3	-17.7651	-133.999	8.12191	5.4107	1012.85	0.0824462	0.366875	0.762883	0.00921868	0.0421313
17148.3	-17.8048	-134.543	7.89489	5.36803	1012.91	0.0955519	0.512705	0.872523	0.0334607	0.0240709
17148.3	-17.851	-135.205	7.60254	5.3329	1012.98	0.14006	0.922309	0.827591	0.0589381	0.0638528
17148.3	-17.861	-134.313	8.57544	5.42607	1013.2	0.106399	0.39512	0.886241	0.0178982	0.0893391
17148.3	-17.6956	-132.385	9.17976	5.48693	1013.3	0.209628	1.45968	0.833592	0.0122953	0.0348767
17148.3	-17.1673	-127.857	9.48167	5.44196	1013.39	0.10894	0.701901	0.843596	0.0490979	0.0601364
17148.4	-17.1807	-127.915	9.53064	5.26165	1013.55	0.103693	0.47659	0.859807	0.0397617	0.0282544
17148.4	-17.1757	-128.279	9.12602	5.17607	1013.61	0.0935588	0.507199	0.835467	0.0206246	0.0334382
17148.4	-17.3336	-130.489	8.18017	5.25368	1013.75	0.107057	0.681047	0.829354	0.037147	0.0563879
17148.4	-17.2834	-130.419	7.84865	5.25714	1013.85	0.101574	0.524134	0.862753	0.0442131	0.0252443
17148.4	-17.4005	-131.582	7.6224	5.14272	1013.9	0.132224	1.1251	0.924685	0.0812704	0.025408
17148.4	-17.6199	-133.686	7.27314	4.9835	1013.82	0.198404	1.47193	1.05728	0.080482	0.0439585
17148.4	-17.4262	-131.491	7.91838	5.11658	1013.86	0.123769	0.715491	0.939766	0.0251394	0.0357531
17148.4	-17.4313	-131.316	8.135	5.05074	1013.93	0.204972	1.5036	0.943359	0.0565358	0.0587257
17148.4	-17.5961	-132.386	8.38333	4.93801	1014.01	0.189704	1.60234	1.05174	0.0821586	0.0327324
17148.4	-17.1067	-127.607	9.24701	5.16296	1014.09	0.167653	1.45406	0.916703	0.0430947	0.0519563
17148.4	-16.901	-126.062	9.14581	5.18886	1014.16	0.12035	0.567353	0.8873	0.0353991	0.0381497
17148.4	-17.0647	-127.741	8.77587	5.12491	1014.3	0.12472	0.642811	0.873127	0.0217889	0.0704083
17148.4	-16.9037	-126.219	9.01098	5.17963	1014.5	0.111988	1.05155	1.01575	0.019593	0.0652542
17148.4	-16.8466	-125.177	9.59652	5.12471	1014.54	0.136368	0.759562	0.864438	0.0293943	0.0377503
17148.5	-16.722	-124.049	9.72689	5.15558	1014.55	0.0948584	0.467568	0.81927	0.0131639	0.0439969
17148.5	-16.653	-123.394	9.83002	5.15636	1014.63	0.0948016	0.384085	0.829815	0.0160181	0.0295952
17148.5	-16.701	-123.724	9.88452	5.11361	1014.57	0.0960134	0.411967	0.810445	0.0227797	0.0298964
17148.5	-16.7825	-124.673	9.58736	5.01071	1014.5	0.121997	0.656989	0.840622	0.0267846	0.0339396
17148.5	-16.6929	-123.607	9.93668	5.06664	1014.38	0.120518	0.892979	0.835867	0.029295	0.0456142
17148.5	-16.5813	-122.48	10.1709	5.0469	1014.41	0.100462	0.390191	0.887446	0.00697253	0.0403425
17148.5	-16.486	-122.006	9.88175	5.02502	1014.48	0.0932772	0.448137	0.814597	0.0233769	0.0349618
17148.5	-16.5188	-123.009	9.14132	4.98642	1014.5	0.1153	0.746611	0.889078	0.0361602	0.034646
17148.5	-16.5483	-123.015	9.37208	4.92823	1014.54	0.122361	0.750286	0.862562	0.033378	0.0317912
17148.5	-16.6048	-123.047	9.79126	4.9081	1014.53	0.111361	0.719598	0.862326	0.0292712	0.0284784
17148.5	-16.7074	-124.389	9.27063	4.83829	1014.54	0.168796	1.59832	0.948498	0.039984	0.0410235
17148.5	-16.7501	-125.64	8.36023	4.87321	1014.61	0.133322	0.845415	0.854088	0.0363518	0.036593
17148.5	-16.6287	-124.318	8.71188	4.85149	1014.74	0.171041	1.24356	0.858063	0.0362223	0.0533645
17148.5	-17.063	-128.168	8.3365	4.61182	1014.82	0.236509	2.10075	0.974206	0.0489605	0.0263797
17148.5	-16.9267	-127.11	8.30351	4.69359	1014.76	0.262269	2.04317	0.933209	0.0962022	0.0454389
17148.6	-17.1941	-129.913	7.63987	4.43833	1014.68	0.182901	1.66803	0.932773	0.0600904	0.0370445
17148.6	-17.2476	-130.691	7.29014	4.43331	1014.71	0.0996256	0.538444	0.836668	0.0283631	0.0284497
17148.6	-17.095	-129.894	6.8661	4.45769	1014.69	0.106329	0.39854	1.01277	0.0131329	0.0262591
17148.6	NaN	NaN	NaN	NaN	1014.64	NaN	NaN	NaN	NaN	0.0327184
17148.6	NaN	NaN	NaN	NaN	1014.66	NaN	NaN	NaN	NaN	0.0282282
17148.6	NaN	NaN	NaN	NaN	1014.69	NaN	NaN	NaN	NaN	0.0276421
17148.6	NaN	NaN	NaN	NaN	1014.81	NaN	NaN	NaN	NaN	0.0451578
17148.6	NaN	NaN	NaN	NaN	1014.9	NaN	NaN	NaN	NaN	0.0265422
17148.6	NaN	NaN	NaN	NaN	1014.97	NaN	NaN	NaN	NaN	0.0315262
17148.6	-17.0577	-129.517	6.94468	4.24301	1014.98	0.139425	0.574866	0.935433	0.0445781	0.0293987
17148.6	-17.1126	-130.612	6.28921	4.10924	1015.03	0.153874	1.04073	0.992383	0.0728496	0.033193
17148.6	-17.4675	-133.918	5.82195	4.05927	1015.14	0.139573	0.685752	0.93514	0.080134	0.0343307
17148.6	-17.3358	-132.374	6.31302	4.34088	1015.24	0.158823	1.08071	0.84012	0.108969	0.0433725
17148.6	-16.7432	-127.41	6.53589	4.45986	1015.27	0.266308	1.85044	0.936466	0.0920275	0.0277511
17148.7	-16.8507	-129.329	5.47686	4.24846	1015.27	0.184033	1.23676	1.04994	0.0750838	0.0224907
17148.7	-17.2694	-131.637	6.51852	4.41067	1015.22	0.167187	0.74565	1.00879	0.0280131	0.0368324
17148.7	-17.3852	-133.578	5.50407	4.20499	1015.24	0.334613	2.88017	1.04588	0.152558	0.0347551
17148.7	-17.6041	-135.453	5.37932	4.43059	1015.31	0.132681	1.17296	0.948422	0.0323322	0.0371847
17148.7	-17.566	-133.908	6.62005	4.44679	1015.34	0.11619	0.60821	0.887575	0.0203902	0.0308059
17148.7	-17.882	-135.124	7.93206	4.48873	1015.37	0.126492	0.54304	0.869353	0.0156024	0.0264316
17148.7	-18.0185	-135.357	8.7906	4.52698	1015.35	0.101212	0.418492	0.89745	0.0225516	0.0269156
17148.7	-18.0681	-135.586	8.95839	4.5072	1015.31	0.109637	0.551826	0.837096	0.0224681	0.0273312
17148.7	-18.012	-135.042	9.05449	4.51296	1015.38	0.107465	0.502201	0.868049	0.0182524	0.0708276
17148.7	-17.9456	-134.411	9.15356	4.49202	1015.49	0.09457	0.464952	0.794685	0.0188536	0.0316205
17148.7	-17.9199	-133.801	9.55796	4.49634	1015.45	0.0987583	0.438801	0.819034	0.0200318	0.0286711
17148.7	-17.9805	-134.109	9.73488	4.45516	1015.5	0.114033	0.548112	0.871373	0.0295251	0.0427261
17148.7	-17.9358	-133.896	9.59048	4.45186	1015.55	0.102676	0.515055	0.826776	0.0248682	0.0215659
17148.7	-17.8942	-133.472	9.6815	4.4566	1015.53	0.104947	0.518424	0.878	0.0302742	0.0366175
17148.8	-17.9629	-133.859	9.84441	4.42864	1015.54	0.12697	0.785009	0.867469	0.0433937	0.0508291
17148.8	-18.0469	-134.313	10.0624	4.39509	1015.68	0.12052	0.632943	0.885496	0.0328095	0.058819
17148.8	-18.152	-134.962	10.2539	4.36236	1015.71	0.121948	0.6879	0.860223	0.0377535	0.0325836
17148.8	-18.1833	-135.277	10.1891	4.35841	1015.68	0.110471	0.539267	0.873782	0.0257408	0.0277053
17148.8	-18.1799	-135.091	10.3488	4.37157	1015.8	0.109169	0.532634	0.827243	0.0265958	0.0646237
17148.8	-18.1516	-134.989	10.2239	4.36412	1015.88	0.110145	0.628214	0.846905	0.0372403	0.0283682
17148.8	-18.112	-134.623	10.2733	4.37639	1015.85	0.097572	0.420324	0.839906	0.0183777	0.0336474
17148.8	-18.0459	-134.356	10.0109	4.336	1015.85	0.0952809	0.392685	0.877613	0.017133	0.024378
17148.8	-18.0109	-134.013	10.074	4.30225	1015.97	0.108179	0.44312	0.87002	0.0358081	0.0513132
17148.8	-18.04	-134.225	10.0955	4.28416	1015.96	0.0971704	0.42112	0.813246	0.0223845	0.0291327
17148.8	-18.0636	-134.115	10.3944	4.28813	1015.88	0.103893	0.55393	0.84851	0.0312274	0.0469573
17148.8	-18.0634	-133.84	10.6679	4.30602	1015.81	0.126577	0.69994	0.894454	0.0408376	0.0279646
17148.8	-17.9961	-133.442	10.5268	4.31661	1015.83	0.0985178	0.400704	0.87676	0.0139788	0.0308309
17148.8	-18.0105	-133.53	10.5538	4.33396	1015.77	0.0989084	0.398552	0.848259	0.0119195	0.0418414
17148.8	-17.9764	-133.319	10.493	4.32489	1015.76	0.0965823	0.426433	0.835548	0.0200375	0.0344517
17148.9	-17.928	-133.008	10.4163	4.33427	1015.74	0.0939555	0.397611	0.848643	0.0190381	0.0290059
17148.9	-17.793	-132.37	9.97414	4.28669	1015.76	0.123444	0.5847	0.896909	0.0309751	0.0321304
17148.9	-17.6579	-131.62	9.64333	4.15471	1015.76	0.139396	0.724822	0.876659	0.0374545	0.0363815
17148.9	-17.6293	-131.368	9.66658	4.1133	1015.71	0.166676	0.980943	0.870081	0.0189039	0.026046
17148.9	-17.432	-130.043	9.41274	4.06898	1015.7	0.125026	0.562725	0.95429	0.0192518	0.028486
17148.9	-17.2717	-128.803	9.3711	3.9582	1015.64	0.170423	1.20764	0.930329	0.0657772	0.032227
17148.9	-17.8795	-133.886	9.14993	3.77931	1015.67	0.153948	1.03242	0.94453	0.0349851	0.0387619
17148.9	-18.2487	-137.169	8.82133	3.68007	1015.71	0.143091	0.907274	0.909724	0.0481733	0.0268407
17148.9	-18.5595	-139.692	8.78332	3.65382	1015.65	0.162593	0.85295	1.02894	0.0495582	0.041993
17148.9	-18.423	-139.2	8.18407	3.71472	1015.66	0.159053	0.716954	0.985858	0.0334222	0.0328986
17148.9	-18.4467	-140.442	7.13147	3.57045	1015.77	0.17635	0.90645	1.00682	0.023828	0.0463143
17148.9	-18.7033	-141.52	8.10649	3.56079	1015.97	0.126194	0.585383	0.934527	0.0355413	0.0705509
17148.9	-18.6906	-142.571	6.95446	3.43449	1016.09	0.13241	0.865604	0.964515	0.0170404	0.0290659
17148.9	-18.8303	-143.341	7.3013	3.4902	1016.21	0.129908	0.570313	1.0321	0.0291911	0.0375708
17149	-18.8207	-143.082	7.48284	3.54666	1016.27	0.133075	0.810185	0.940119	0.0549483	0.0310864
17149	-18.6604	-141.469	7.81374	3.54048	1016.29	0.107272	0.530931	0.914886	0.0413691	0.0244112
17149	-18.6961	-141.176	8.3932	3.51259	1016.31	0.105464	0.503487	0.903343	0.0104036	0.0328414
17149	-18.623	-140.523	8.46166	3.5166	1016.26	0.113553	0.505582	0.989029	0.0192615	0.0339073
17149	-18.625	-140.439	8.56099	3.49503	1016.1	0.110614	0.501958	0.941038	0.0107181	0.0750899
17149	-18.5212	-139.497	8.6725	3.45636	1015.97	0.107546	0.493011	0.941393	0.0297958	0.0259031
17149	-18.5126	-139.081	9.01943	3.36294	1016.04	0.117152	0.502604	0.966552	0.0512985	0.0390568

## Sheet: isotope_precipitation
sample_name	FARLAB_ID	start_time_local	end_time_local	dD	dD_SE	d18O	d18O_SE	dxs	dxs_SE	Quality_flags	note	start_time_UTC	end_time_UTC	dD_eq	dD_eq_SE	d18O_eq	d18O_eq_SE	dxs_eq	dxs_eq_SE	RH_avg_%	Diameter_avg_mm	TPS3100_rain_rate_mm/h	TPS3100_rain_sum_mm
20161207_R1	2016-01-YW-111	2016-12-07 01:00	2016-12-07 02:45	-14.74	0.3	-1.83	0.04	-0.12	0.41	- - - 4 - -	very windy and light rain	736671	736671	-107.154	0.0724426	-12.595	0.019779	-6.39416	0.174026	78.8182	0.880467	0.45	0.791667
20161207_R2	2016-01-YW-112	2016-12-07 02:45	2016-12-07 04:30	-16.19	0.29	-1.66	0.04	-2.91	0.41	- - - 4 - -	very windy and light rain	736671	736671	-108.558	0.0543352	-12.4223	0.019779	-9.17951	0.167302	79	0.75538	0.55	0.9675
20161207_R3	2016-01-YW-113	2016-12-07 04:30	2016-12-07 05:10	-50.12	0.3	-6.48	0.04	1.72	0.43	- - - 4 - -	still windy precip increases	736671	736671	-139.044	0.0815085	-17.2235	0.00988958	-1.25611	0.113592	78.2	0.911061	0.93	0.574833
20161207_R4	2016-01-YW-114	2016-12-07 05:10	2016-12-07 05:40	-60.9	0.31	-8.16	0.04	4.39	0.43	- - - - - -	AR event from southeast	736671	736671	-148.975	0.135847	-18.925	0.0197791	2.42434	0.208547	80.5	1.14614	1.17	0.562667
20161207_R5	2016-01-YW-115	2016-12-07 05:40	2016-12-07 06:10	-75.44	0.3	-10.16	0.04	5.84	0.42	- - - - 5 -	NaN	736671	736671	-162.301	0.0452702	-20.9324	0.0197787	5.15776	0.164579	83.75	0.995586	1.49	0.692
20161207_R6	2016-01-YW-116	2016-12-07 06:10	2016-12-07 06:40	-90.74	0.3	-12.07	0.04	5.85	0.43	- - - - - -	NaN	736671	736671	-175.991	0.0633916	-22.8354	0.0197791	6.69261	0.170458	85.3333	1.43083	1.71	0.842
20161207_R7	2016-01-YW-117	2016-12-07 06:40	2016-12-07 07:00	-95.5	0.3	-12.82	0.04	7.06	0.43	- - - - 5 -	NaN	736671	736671	-180.149	0.05435	-23.5774	0.00988973	8.47035	0.0959872	87	1.05831	2.14	0.686833
20161207_R8	2016-01-YW-118	2016-12-07 07:00	2016-12-07 07:20	-101.43	0.3	-13.61	0.04	7.41	0.42	- - - - - -	NaN	736671	736671	-185.36	0.108724	-24.3425	0.0197798	9.37957	0.19199	88	0.997377	2.2	0.692333
20161207_R9	2016-01-YW-119	2016-12-07 07:20	2016-12-07 07:40	-101.39	0.3	-13.79	0.04	8.92	0.43	- - - - - -	NaN	736671	736671	-185.067	0.0634443	-24.4946	0.00989015	10.8903	0.101417	88.6667	1.05706	2.68	0.840667
20161207_R10	2016-01-YW-120	2016-12-07 07:40	2016-12-07 07:50	-102.56	0.3	-14.06	0.04	9.94	0.43	- - - - - -	NaN	736671	736671	-186.091	0.0997026	-24.7683	0.00989019	12.0549	0.127282	89	1.21541	3.38	0.479333
20161207_R11	2016-01-YW-121	2016-12-07 07:50	2016-12-07 08:05	-95.9	0.31	-13.4	0.04	11.27	0.43	- - - - - -	NaN	736671	736671	-180.074	0.0362579	-24.1107	0.00989024	12.8118	0.0870339	89.5	1.43091	4.22	0.869333
20161207_R12	2016-01-YW-122	2016-12-07 08:05	2016-12-07 08:20	-92.09	0.31	-13.02	0.04	12.04	0.43	- - - - - -	NaN	736671	736671	-176.396	0.0815961	-23.7006	0.0197808	13.2089	0.178044	90.5	1.1769	4.91	1.31133
20161207_R13	2016-01-YW-123	2016-12-07 08:20	2016-12-07 08:30	-87.8	0.29	-12.45	0.04	11.77	0.4	- - - - - -	NaN	736671	736671	-172.426	0.0181348	-23.1271	0.00989048	12.5915	0.0811755	91	1.22964	2.56	0.673167
20161207_R14	2016-01-YW-124	2016-12-07 08:30	2016-12-07 08:48	-83.59	0.3	-11.96	0.04	12.1	0.42	- - - - - -	NaN	736671	736671	-168.563	0.0634761	-22.6377	0.00989053	12.5381	0.101439	91	1.02069	2.94	0.762833
20161207_R15	2016-01-YW-125	2016-12-07 08:48	2016-12-07 09:00	-79.53	0.3	-11.44	0.04	12.01	0.42	- - - - - -	NaN	736671	736671	-164.528	0.0816227	-22.1038	0.0197813	12.3023	0.17806	91.5	1.1855	3.9	0.703167
20161207_R16	2016-01-YW-126	2016-12-07 09:00	2016-12-07 09:30	-76	0.3	-11	0.04	11.97	0.42	- - - - - -	Set up the totalisator at kl 0900	736671	736671	-161.354	0.0544293	-21.6493	0.0197816	11.8404	0.167352	91.75	1.1385	3.58	1.937
20161207_R17	2016-01-YW-127	2016-12-07 09:30	2016-12-07 09:45	-72.16	0.3	-10.47	0.04	11.63	0.42	- - - - - -	NaN	736671	736671	-157.616	0.0816703	-21.101	0.00989107	11.1916	0.113716	91	1.16197	4.1	0.816667
20161207_R18	2016-01-YW-128	2016-12-07 09:45	2016-12-07 10:00	-71.95	0.31	-10.38	0.04	11.13	0.43	- - - - - -	NaN	736671	736671	-157.272	0.0544539	-21.0024	0.0197823	10.7471	0.167365	91.5	1.19853	3.81	1.00283
20161207_R19	2016-01-YW-129	2016-12-07 10:00	2016-12-07 10:10	-71.89	0.29	-10.38	0.04	11.14	0.42	- - - - - -	NaN	736671	736671	-157.136	0.154296	-20.9778	0.0296736	10.6864	0.283127	91	1.21537	5.17	0.686
20161207_R20	2016-01-YW-130	2016-12-07 10:10	2016-12-07 10:20	-71.74	0.3	-10.35	0.04	11.07	0.41	- - - - 5 -	NaN	736671	736671	-156.982	0.0363073	-20.9631	0.00989126	10.723	0.087062	91.5	1.46404	5.23	0.904333
20161207_R21	2016-01-YW-131	2016-12-07 10:20	2016-12-07 10:35	-72.36	0.3	-10.37	0.04	10.59	0.42	- - - - - -	NaN	736671	736671	-157.517	0.0363073	-20.973	0.00989126	10.2666	0.087062	92	1.28749	5	1.3295
20161207_R22	2016-01-YW-132	2016-12-07 10:35	2016-12-07 10:45	-69.18	0.3	-9.95	0.04	10.41	0.42	- - - - - -	NaN	736671	736671	-154.721	0.0544609	-20.5575	0.0197825	9.73877	0.167369	92	1.5371	3.53	0.786667
20161207_R23	2016-01-YW-133	2016-12-07 10:45	2016-12-07 11:00	-66.96	0.29	-9.52	0.04	9.2	0.41	- - - - 5 -	NaN	736671	736671	-152.488	0.1271	-20.1178	0.0197828	8.45394	0.202981	92	1.0827	1.96	0.6565
20161207_R24	2016-01-YW-134	2016-12-07 11:00	2016-12-07 11:10	-68.79	0.29	-9.76	0.04	9.32	0.42	- - - - - -	NaN	736671	736671	-154.077	0.10895	-20.3504	0.0296744	8.72584	0.261202	93	0.921648	2.69	0.3055
20161207_R25	2016-01-YW-135	2016-12-07 11:10	2016-12-07 11:25	-70.02	0.3	-9.91	0.04	9.26	0.42	- - - - - -	NaN	736671	736671	-155.131	0.0817176	-20.4841	0.0296745	8.74191	0.251067	92.5	1.31544	3.06	0.740667
20161207_R26	2016-01-YW-136	2016-12-07 11:25	2016-12-07 11:40	-69.04	0.3	-9.73	0.04	8.82	0.42	- - - - - -	NaN	736671	736671	-154.169	0.0726472	-20.2964	0.0098916	8.20286	0.107423	92	1.35229	2.5	0.7205
20161207_R27	2016-01-YW-137	2016-12-07 11:40	2016-12-07 11:50	-71.34	0.3	-9.98	0.04	8.52	0.42	- - - - - -	NaN	736671	736671	-156.14	0.136231	-20.5441	0.0098917	8.21232	0.157547	92	1.25893	3.31	0.406167
20161207_R28	2016-01-YW-138	2016-12-07 11:50	2016-12-07 12:00	-66.52	0.31	-9.33	0.04	8.15	0.43	- - - - - -	NaN	736671	736671	-151.708	0.118074	-19.8864	0.0197835	7.38306	0.19746	92	1.4752	2.67	0.5885
20161207_R29	2016-01-YW-139	2016-12-07 12:00	2016-12-07 12:15	-63.55	0.3	-8.86	0.04	7.35	0.42	- - - - 5 -	NaN	736671	736671	-148.984	0.136248	-19.4365	0	6.50848	0.136248	91.5	1.12512	2.05	0.552
20161207_R30	2016-01-YW-140	2016-12-07 12:15	2016-12-07 12:30	-61.5	0.3	-8.65	0.04	7.66	0.42	- - - - - -	NaN	736671	736671	-146.858	0.109013	-19.1796	0.00989189	6.57909	0.134708	91	1.1896	2.01	0.464667
20161207_R31	2016-01-YW-141	2016-12-07 12:30	2016-12-07 12:45	-64.05	0.31	-8.97	0.04	7.69	0.44	- - - - - -	NaN	736671	736671	-149.202	0.0363399	-19.4815	0.00989194	6.65009	0.0870805	91	1.28028	2.23	0.597167
20161207_R32	2016-01-YW-142	2016-12-07 12:45	2016-12-07 13:05	-61.47	0.3	-8.56	0.04	7.03	0.43	- - - - - -	NaN	736671	736672	-146.777	0.0454306	-19.0763	0.0197841	5.83374	0.164664	91	1.00061	1.42	0.6265
20161207_R33	2016-01-YW-143	2016-12-07 13:05	2016-12-07 13:30	-68.26	0.29	-9.44	0.04	7.27	0.41	- - - - - -	NaN	736672	736672	-152.73	0.0636137	-19.9341	0.0197843	6.74312	0.17058	90.6667	1.23639	1.61	0.490333
20161207_R34	2016-01-YW-144	2016-12-07 13:30	2016-12-07 13:45	-68.19	0.29	-9.4	0.04	7.03	0.42	- - - - - -	NaN	736672	736672	-152.649	0.145415	-19.8882	0.00989223	6.45672	0.165555	91	1.13755	2.54	0.536333
20161207_R35	2016-01-YW-145	2016-12-07 13:45	2016-12-07 13:55	-68.05	0.29	-9.46	0.04	7.61	0.41	- - - - - -	NaN	736672	736672	-152.494	0.145415	-19.9475	0.0197845	7.08605	0.214934	91	1.06298	3.23	0.5015
20161207_R36	2016-01-YW-146	2016-12-07 13:55	2016-12-07 14:05	-68.64	0.28	-9.51	0.04	7.48	0.41	- - - - - -	NaN	736672	736672	-153.03	0.136327	-20.0168	0.00989223	7.10379	0.157632	92	1.04098	3.21	0.537833
20161207_R37	2016-01-YW-147	2016-12-07 14:05	2016-12-07 14:15	-68.48	0.3	-9.42	0.04	6.91	0.42	- - - - - -	NaN	736672	736672	-152.885	0.0454422	-19.908	0.00989223	6.37869	0.0912567	92	1.05119	2.76	0.5095
20161207_R38	2016-01-YW-148	2016-12-07 14:15	2016-12-07 14:25	-74.12	0.3	-10.05	0.04	6.27	0.42	- - - - - -	NaN	736672	736672	-157.993	0.11815	-20.5411	0.0296767	6.33581	0.265188	92	1.05321	3.14	0.457667
20161207_R39	2016-01-YW-149	2016-12-07 14:25	2016-12-07 14:35	-80.98	0.3	-10.87	0.04	5.98	0.42	- - - - - -	NaN	736672	736672	-164.085	0.118165	-21.3526	0.00989232	6.73613	0.142217	92	1.11198	3.45	0.545
20161207_R40	2016-01-YW-150	2016-12-07 14:35	2016-12-07 14:45	-86.21	0.3	-11.4	0.04	4.96	0.42	- - - - - -	NaN	736672	736672	-168.921	0.172702	-21.8868	0.0197846	6.17395	0.23426	92	1.15817	3.96	0.589833
20161207_R41	2016-01-YW-151	2016-12-07 14:45	2016-12-07 14:55	-83.23	0.29	-11.01	0.04	4.81	0.41	- - - - - -	NaN	736672	736672	-166.028	0.109103	-21.4821	0.00989251	5.8287	0.134783	91	1.25323	3.71	0.666333
20161207_R42	2016-01-YW-152	2016-12-07 14:55	2016-12-07 15:05	-86.54	0.31	-11.35	0.04	4.25	0.44	- - - - - -	NaN	736672	736672	-169.052	0.109089	-21.8279	0.0197848	5.57147	0.19223	91	1.10211	3.29	0.595167
20161207_R43	2016-01-YW-153	2016-12-07 15:05	2016-12-07 15:15	-89.62	0.29	-11.71	0.04	4.03	0.42	- - - - - -	NaN	736672	736672	-171.792	0.0818271	-22.1745	0.0296775	5.60424	0.251126	92	1.12408	3.22	0.536833
20161207_R44	2016-01-YW-154	2016-12-07 15:15	2016-12-07 15:25	-78.97	0.29	-10.35	0.04	3.79	0.41	- 2 - - - -	NaN	736672	736672	-162.076	0.345536	-20.8098	0.049463	4.40241	0.525335	91	1.2452	3.77	0.644833
20161207_R45	2016-01-YW-155	2016-12-07 15:25	2016-12-07 15:50	-65.69	0.3	-8.73	0.04	4.13	0.42	- - - - - -	warm air mass arriving	736672	736672	-149.828	0.200047	-19.1775	0.0395704	3.5925	0.374475	91.6667	0.729593	2.31	0.858667
20161207_R46	2016-01-YW-156	2016-12-07 15:50	2016-12-07 16:00	-60.79	0.28	-8.13	0.03	4.26	0.39	- - - - - -	melt layer disappears	736672	736672	-145.598	0.0181838	-18.6033	0.00989251	3.22841	0.0812023	92	0.859976	2.48	0.6375
20161207_R47	2016-01-YW-157	2016-12-07 16:00	2016-12-07 16:15	-55.72	0.29	-7.48	0.04	4.12	0.41	- - - 4 - -	NaN	736672	736672	-140.953	0.0909247	-17.9457	0.0296777	2.61292	0.254237	92.5	0.64035	1.73	0.459667
20161207_R48	2016-01-YW-158	2016-12-07 16:15	2016-12-07 16:30	-48.71	0.3	-6.74	0.04	5.22	0.42	- - - 4 - -	NaN	736672	736672	-134.451	0.109117	-17.1891	0.0197852	3.06152	0.192249	93	1.00759	3.84	0.790667
20161207_R49	2016-01-YW-159	2016-12-07 16:30	2016-12-07 16:40	-43.52	0.3	-6.09	0.04	5.18	0.43	- 2 - 4 - -	NaN	736672	736672	-129.887	0.181861	-16.5659	0.0296778	2.64036	0.29907	93	0.931152	3.21	0.561167
20161207_R50	2016-01-YW-160	2016-12-07 16:40	2016-12-07 17:00	-38.26	0.3	-5.36	0.04	4.63	0.42	- - - 4 5 -	NaN	736672	736672	-124.728	0.127343	-15.8002	0.00989285	1.67385	0.149933	93	0.796636	2.42	0.780167
20161207_R51	2016-01-YW-161	2016-12-07 17:00	2016-12-07 17:20	-35.39	0.3	-5.13	0.04	5.67	0.42	- - - 4 - -	NaN	736672	736672	-122.053	0.0818632	-15.5726	0.0296785	2.52777	0.251145	93	0.95506	3.14	1.15217
20161207_R52	2016-01-YW-162	2016-12-07 17:20	2016-12-07 17:40	-28.61	0.31	-4.31	0.04	5.84	0.43	- - - 4 5 -	NaN	736672	736672	-115.995	0.100055	-14.7515	0.00989285	2.0168	0.127572	93	0.870944	3.42	1.02267
20161207_R53	2016-01-YW-163	2016-12-07 17:40	2016-12-07 18:00	-26.12	0.3	-4.03	0.04	6.08	0.42	- - - 4 - -	NaN	736672	736672	-113.685	0.245585	-14.4662	0.0494642	2.04427	0.465726	93.6667	0.959558	2.08	0.817167
20161207_R54	2016-01-YW-164	2016-12-07 18:00	2016-12-07 18:20	-24	0.3	-3.74	0.04	5.94	0.42	- - - 4 - -	NaN	736672	736672	-111.627	0.14555	-14.1698	0.00989293	1.73148	0.165676	94	1.02802	2.83	1.03417
20161207_R55	2016-01-YW-165	2016-12-07 18:20	2016-12-07 18:40	-21.92	0.3	-3.49	0.04	5.98	0.42	- - - 4 - -	NaN	736672	736672	-109.55	0.145568	-13.8833	0.019786	1.51644	0.215047	94	1.18205	2.42	0.738333
20161207_R56	2016-01-YW-166	2016-12-07 18:40	2016-12-07 19:00	-21.03	0.3	-3.42	0.04	6.35	0.42	- - - 4 - -	NaN	736672	736672	-108.821	0.118279	-13.8406	0.0296792	1.90334	0.265263	94	0.941885	3.03	1.00567
20161207_R57	2016-01-YW-167	2016-12-07 19:00	2016-12-07 19:20	-18.64	0.28	-3.1	0.04	6.13	0.41	- - - 4 - -	NaN	736672	736672	-106.674	0.145574	-13.5141	0.0197861	1.43879	0.215052	94	0.882553	3.13	0.932167
20161207_R58	2016-01-YW-168	2016-12-07 19:20	2016-12-07 19:40	-21.7	0.29	-3.61	0.04	7.22	0.41	- - - 4 - -	NaN	736672	736672	-109.46	0.136464	-14.0448	0.00989299	2.8981	0.157754	94	1.11308	3.59	1.34483
20161207_R59	2016-01-YW-169	2016-12-07 19:40	2016-12-07 20:00	-20.17	0.31	-3.43	0.04	7.27	0.43	- - - 4 5 -	NaN	736672	736672	-108.039	0.0727856	-13.8521	0	2.77711	0.0727856	94	1.1013	5.05	1.595
20161207_R60	2016-01-YW-170	2016-12-07 20:00	2016-12-07 20:10	-17.96	0.3	-3	0.04	6.07	0.42	- - - 4 - -	NaN	736672	736672	-106.182	0.209272	-13.4615	0.0395723	1.51011	0.379495	94	1.02371	4.99	0.501667
20161207_R61	2016-01-YW-171	2016-12-07 20:10	2016-12-07 20:20	-22.58	0.3	-3.67	0.04	6.8	0.44	- - - 4 - -	NaN	736672	736672	-110.185	0.100087	-14.1046	0.0197862	2.65106	0.187277	94.5	1.05716	5.74	0.832667
20161207_R62	2016-01-YW-172	2016-12-07 20:20	2016-12-07 20:42	-16.8	0.28	-2.81	0.04	5.72	0.41	- - - 4 - -	NaN	736672	736672	-104.625	0.172953	-13.2206	0.0197868	1.14011	0.234456	94.5	1.09501	2.48	1.32517
20161207_R63	2016-01-YW-173	2016-12-07 20:42	2016-12-07 20:51	-19.08	0.29	-3.24	0.04	6.8	0.42	- - - 4 - -	NaN	736672	736672	-106.635	0.02731	-13.6314	0.00989347	2.416	0.0837269	95	0.83006	4.81	0.551667
20161207_R64	2016-01-YW-174	2016-12-07 20:51	2016-12-07 21:00	-17.38	0.29	-3.17	0.04	7.94	0.42	- - - 4 - -	NaN	736672	736672	-105.042	0.10924	-13.5819	0.0197869	3.61334	0.19233	94	1.0081	4.92	0.679167
20161207_R65	2016-01-YW-175	2016-12-07 21:00	2016-12-07 21:10	-14.24	0.29	-2.54	0.04	6.07	0.42	- - - 4 - -	NaN	736672	736672	-102.128	0.200286	-12.9342	0.019787	1.34546	0.255288	94	1.08863	3.17	0.841333
20161207_R66	2016-01-YW-176	2016-12-07 21:10	2016-12-07 21:28	-10.67	0.29	-2.09	0.04	6.01	0.42	- - - 4 - -	NaN	736672	736672	-98.7	0.528125	-12.4748	0.0692556	1.09827	0.765429	94	1.02833	2.44	0.776333
20161207_R67	2016-01-YW-177	2016-12-07 21:28	2016-12-07 21:45	-9.44	0.28	-1.88	0.04	5.63	0.41	- - - 4 - -	NaN	736672	736672	-97.5329	0.282291	-12.2623	0.0395748	0.565486	0.424173	95	0.787678	3.5	0.787
20161207_R68	2016-01-YW-178	2016-12-07 21:45	2016-12-07 21:55	-9.61	0.29	-1.91	0.04	5.67	0.42	- - - 4 5 -	NaN	736672	736672	-97.6589	0.0455337	-12.2972	0.00989375	0.718399	0.0913129	95	0.847618	4.39	0.643167
20161207_R69	2016-01-YW-179	2016-12-07 21:55	2016-12-07 22:10	-9.66	0.32	-1.93	0.04	5.78	0.46	- - - 4 5 -	NaN	736672	736672	-97.8168	0.091056	-12.3264	0.00989365	0.794279	0.120647	95	0.906392	2.79	0.873
20161207_R70	2016-01-YW-180	2016-12-07 22:10	2016-12-07 22:25	-25.19	0.28	-4.1	0.04	7.63	0.42	- - - 4 - -	NaN	736672	736672	-111.802	0.163911	-14.4686	0.0296811	3.94648	0.288529	95	1.02796	6.86	0.850833
20161207_R71	2016-01-YW-181	2016-12-07 22:25	2016-12-07 22:45	-9.2	0.3	-1.86	0.04	5.68	0.42	- - - 4 5 -	NaN	736672	736672	-97.3023	0.10018	-12.2331	0.0098938	0.562462	0.127675	95	1.06782	1.45	1.69867

[truncated: 2 more sheets: Rayleigh_model_JM1984, precipitation_stages]
